# Supplementary material for: Application of electroacupuncture for postoperative pain management after total knee arthroplasty: a study protocol for a single-blinded, randomised placebo-controlled trial
Source: PubMed Central journal article supplement — BMJ Open. 2019 Apr 8;9(4):e026084. doi: 10.1136/bmjopen-2018-026084 (PMC6500353; doi:10.1136/bmjopen-2018-026084), 2019-04-08
Supplement: bmjopen-2018-026084.draft_revisions.pdf [file bmjopen-2018-026084.draft_revisions.pdf]

# BMJ Open

BMJ Open is committed to open peer review. As part of this commitment we make the peer review history of every article we publish publicly available.

When an article is published we post the peer reviewers' comments and the authors' responses online. We also post the versions of the paper that were used during peer review. These are the versions that the peer review comments apply to.

The versions of the paper that follow are the versions that were submitted during the peer review process. They are not the versions of record or the final published versions. They should not be cited or distributed as the published version of this manuscript.

BMJ Open is an open access journal and the full, final, typeset and author-corrected version of record of the manuscript is available on our site with no access controls, subscription charges or pay-per-view fees (<http://bmjopen.bmj.com>).

If you have any questions on BMJ Open's open peer review process please email [info.bmjopen@bmj.com](mailto:info.bmjopen@bmj.com)

# BMJ Open

## Application of electroacupuncture for postoperative pain management after total knee arthroplasty: a study protocol for a single-blinded, randomised placebo-controlled trial

|                               |                                                                                                                                                                                                                                                                                                                                                                                                                                                                                                                                                                                                                                                                                                                                                                                                                                                    |
|-------------------------------|----------------------------------------------------------------------------------------------------------------------------------------------------------------------------------------------------------------------------------------------------------------------------------------------------------------------------------------------------------------------------------------------------------------------------------------------------------------------------------------------------------------------------------------------------------------------------------------------------------------------------------------------------------------------------------------------------------------------------------------------------------------------------------------------------------------------------------------------------|
| Journal:                      | <i>BMJ Open</i>                                                                                                                                                                                                                                                                                                                                                                                                                                                                                                                                                                                                                                                                                                                                                                                                                                    |
| Manuscript ID                 | bmjopen-2018-026084                                                                                                                                                                                                                                                                                                                                                                                                                                                                                                                                                                                                                                                                                                                                                                                                                                |
| Article Type:                 | Protocol                                                                                                                                                                                                                                                                                                                                                                                                                                                                                                                                                                                                                                                                                                                                                                                                                                           |
| Date Submitted by the Author: | 20-Aug-2018                                                                                                                                                                                                                                                                                                                                                                                                                                                                                                                                                                                                                                                                                                                                                                                                                                        |
| Complete List of Authors:     | Zhong, Sheng; Shanghai University of Traditional Chinese Medicine<br>Guanghua Hospital of Integrated Traditional Chinese Medicine and Western Medicine<br>Huang, Hai; Shanghai University of Traditional Chinese Medicine Guanghua<br>Hospital of Integrated Traditional Chinese Medicine and Western Medicine<br>Xie, Jun; Shanghai University of Traditional Chinese Medicine Guanghua<br>Hospital of Integrated Traditional Chinese Medicine and Western Medicine<br>Zhao, Ling; Shanghai University of Traditional Chinese Medicine<br>Song, Xiu-ling; Shanghai University of Traditional Chinese Medicine<br>Chen, Yue-lai; Shanghai University of Traditional Chinese Medicine<br>Xiao, Lian-bo; Shanghai University of Traditional Chinese Medicine<br>Guanghua Hospital of Integrated Traditional Chinese Medicine and Western<br>Medicine |
| Keywords:                     | electroacupuncture, postoperative pain, total knee arthroplasty, the study protocol                                                                                                                                                                                                                                                                                                                                                                                                                                                                                                                                                                                                                                                                                                                                                                |
|                               |                                                                                                                                                                                                                                                                                                                                                                                                                                                                                                                                                                                                                                                                                                                                                                                                                                                    |

SCHOLARONE™  
Manuscripts

1           **Application of electroacupuncture for postoperative pain management after total**  
2  
3  
4  
5  
6           **2 knee arthroplasty: a study protocol for a single-blinded, randomised**  
7  
8           **3 placebo-controlled trial**

10           4 Sheng Zhong, Hai Huang, Jun Xie, Ling Zhao, Xiu-ling Song, Yue-lai Chen, Lian-bo  
11  
12  
13           5 Xiao

15           **6 Author Affiliations:**

17           7 Sheng Zhong, MD, Guanghua Hospital, Shanghai University of Traditional Chinese  
18  
19  
20           8 Medicine, Shanghai, China, drcyan@foxmail.com

22           9 Hai Huang, MD, Guanghua Hospital, Shanghai University of Traditional Chinese  
23  
24  
25           10 Medicine, Shanghai, China, haichuan880@163.com

27           11 Jun Xie, MD, Guanghua Hospital, Shanghai University of Traditional Chinese  
28  
29  
30           12 Medicine, Shanghai, China, leoxie199@126.com

32           13 Ling Zhao, PhD, Shanghai University of Traditional Chinese Medicine, Shanghai,  
33  
34  
35           14 China, zhao099@hotmail.com

37           15 Xiu-ling Song, MD, Shanghai University of Traditional Chinese Medicine, Shanghai,  
38  
39  
40           16 China, songxiuling2007@163.com

42           17 Yue-lai Chen, PhD, Shanghai University of Traditional Chinese Medicine, Shanghai,  
43  
44  
45           18 China, chenylai@163.com

47           19 Lian-bo Xiao, MD, Guanghua Hospital, Shanghai University of Traditional Chinese  
48  
49  
50           20 Medicine, Shanghai, China, 13701888178@163.com

52           **21 Corresponding Author:**

54           22 Lian-bo Xiao, PhD, Guanghua Hospital, Shanghai University of Traditional Chinese  
55  
56  
57  
58  
59  
60

1  
2  
3 23 Medicine, No. 540 Xinhua Road, Changning District, Shanghai (CN 200052), China,  
4  
5

6 24 13701888178@163.com, +8613701888178  
7

8 25 Yue-lai Chen, PhD, Shanghai University of Traditional Chinese Medicine, No. 540  
9

10 26 Cailun Road, Pudong District, Shanghai (CN 201203), China, chenyuelai@163.com,  
11  
12

13 27 +8613020193726  
14

15 28 Lian-bo Xiao and Yue-lai Chen contributed equally to this paper.  
16  
17

18 29  
19

### 20 30 **Author Contributions**

21  
22 31 SZ and LBX conceived the study while HH, JX, LZ, XLS designed the study. The  
23  
24

25 32 study protocol was drafted by SZ and LBX, and was revised by YLC. All authors  
26  
27

28 33 approved the final manuscript of this study protocol.  
29

30 34 **Word Count:**2190  
31

### 32 35 **Funding**

33  
34 36 This work will be supported by Project of Shanghai University of Traditional  
35  
36

37 37 Chinese Medicine Grant (Y201812).  
38  
39

### 40 38 **Conflicts of Interests**

41  
42 39 The authors declared that there are no potential conflicts of interest with respect  
43  
44

45 40 to the research, authorship, and/or publication of this study.  
46  
47

48 41  
49  
50  
51  
52  
53  
54  
55  
56  
57  
58  
59  
60

1  
2  
3 **42 Abstract:**

4 **43 Introduction:** The purpose of this study is to assess the efficacy of electroacupuncture  
5  
6  
7 **44** to relief pain and promote functional rehabilitation after total knee surgery.

8  
9 **45** Methods and analysis: We propose a single-blinded, randomised placebo-controlled  
10  
11  
12 **46** trial to evaluate the efficacy of electroacupuncture. Osteoarthritis patients (aged 55 to  
13  
14  
15 **47** 80 years) undergoing unilateral total knee arthroplasty will be included in the trial.

16  
17 They will be randomised to receive either electroacupuncture or  
18  
19 **49** sham-electroacupuncture. A total of 110 patients will receive electroacupuncture and  
20  
21  
22 **50** sham-electroacupuncture for three days after TKA. Postoperative pain will be  
23  
24  
25 **51** measured using VAS score, and the need for an additional dose of opioid and  
26  
27 **52** analgesics will be recorded as the primary outcome. Secondary outcomes include  
28  
29 **53** knee function and swelling, postoperative anxiety, postoperative nausea and vomiting  
30  
31  
32 **54** among other complications.

33  
34 **55** Ethics and dissemination: This study has been approved by the ethics committee, and  
35  
36  
37 **56** subsequent modifications of the protocol will be reported and approved by it. Written  
38  
39 **57** inform content will be obtained from all of the participants or their authorized agents.

40  
41 **58** Trial registration number: ChiCTR1800016200

42  
43  
44 **59** Keywords: electroacupuncture, postoperative pain, total knee arthroplasty, the study  
45  
46  
47 **60** protocol

48  
49  
50  
51 **62 Article Summary**

52  
53 **63** *Strengths and limitations of this study*

54  
55  
56 **64** The study is the first single-blinded, randomised placebo-controlled trial in China  
57  
58

1  
2  
3  
4 65 to assess the efficacy of electroacupuncture to relief pain and promote functional  
5  
6 66 rehabilitation after total knee surgery.  
7

8 67 The study will use an efficient sham-electroacupuncture method that makes it  
9  
10 68 hard for patients with acupuncture treatment experience to distinguish between both  
11  
12  
13 69 treatments.  
14

15 70 The study is rigorously designed, which includes adequate sample size, proper  
16  
17  
18 71 randomization and allocation concealment, and prospective trial registration to reduce  
19  
20  
21 72 selection and confounding bias.  
22

23 73 Yet, the placebo effect cannot be eliminated due to the unblinded surgeons and  
24  
25 74 acupuncturists.  
26  
27

28 75

## 30 76 **Introduction**

31  
32 77 Total knee arthroplasty (TKA) is the most frequently performed surgical  
33  
34  
35 78 procedure for end-stage osteoarthritis and rheumatoid arthritis. Moderate to severe  
36  
37  
38 79 postoperative pain is a major complaint in most patients. Acute and subacute  
39  
40  
41 80 postoperative pain is highly associated with persistent post-surgical pain (PPSP),  
42  
43 81 especially when the acute pain is not treated with effective analgesia.<sup>1</sup> A recent study  
44  
45 82 showed that 10%-34% and 7%-23% of patients reported severe pain after TKA and  
46  
47  
48 83 total hip arthroplasty (THA), respectively, which indicates that TKA patients are more  
49  
50 84 likely to develop PPSP.<sup>2</sup> Multimodal analgesia has been used for 20 years and it is  
51  
52  
53 85 considered to be the most effective strategy for PPSP. Abuse of analgesic drugs has  
54  
55 86 increased exposure of the public to the side effects of non-steroidal anti-inflammatory  
56  
57  
58  
59  
60

1  
2  
3 87 drugs (NSAIDs) and opioids.<sup>3,4</sup> Drug-free interventions to reduce pain or opioid  
4  
5  
6 88 consumption are more consistent with the principles of enhanced recovery after  
7  
8  
9 89 surgery (ERAS).

10  
11 90 According to the theories of Traditional Chinese Medicine (TCM), acupuncture  
12  
13 91 can help dredge the meridians and correct imbalance of flow of energy. Clinical trials  
14  
15  
16 92 and systematic reviews have shown that acupuncture is effective against many  
17  
18 93 different types of acute and chronic pain.<sup>5-7</sup> Electroacupuncture (EA) has been proved  
19  
20 94 to be beneficial for postoperative pain after TKA.<sup>8</sup> Studies on the mechanism of  
21  
22  
23 95 electroacupuncture analgesia indicated that it activates many bioactive chemicals  
24  
25  
26 96 through peripheral, spinal, and supraspinal mechanisms.<sup>9</sup> We hypothesize that EA  
27  
28 97 may active the descending pain regulation of the periaqueductal grey (PAG) and the  
29  
30 98 rostral ventromedial medulla (RVM).<sup>10-12</sup> Besides, the placebo effect is highly  
31  
32  
33 99 associated with both areas of the brain.<sup>13</sup> Strict blinding is required to rule out the  
34  
35 100 effects of the placebo effect on outcomes.

36  
37  
38 101 The purpose of this study is to assess the efficacy of electroacupuncture on pain  
39  
40 102 relief and promoting functional rehabilitation after total knee surgery. We will use a  
41  
42  
43 103 large sample size and an effective electroacupuncture blind method to ensure a  
44  
45 104 credible conclusion.

46  
47 105

## 48 49 50 106 **Methods and analysis**

### 51 52 107 *Study Context*

53  
54  
55 108 This study will be a parallel randomised controlled trial performed at the inpatient  
56  
57  
58  
59  
60

1  
2  
3  
4 109 ward of Shanghai University of Traditional Chinese Medicine Guanghua Hospital,  
5  
6 110 Shanghai, China. The annual surgical number of total knee arthroplasty for  
7  
8 111 osteoarthritis was about 600 in 2017. In this study, there will be 7 investigators,  
9  
10 112 including a chief orthopaedic surgeon (LBX) with 20 years of clinical experience, two  
11  
12 113 orthopaedic physicians (JX and SZ), two Chinese medicine acupuncturists (HH and  
13  
14 114 YLC), and two outcome assessors (LZ, and XLS). ERAS programme will be  
15  
16 115 performed by trained nurses and physiotherapists at the inpatient ward. The schedule  
17  
18 116 and the study flow diagram is shown in Table1 and Figure 1.  
19  
20  
21  
22

### 23 117 *Sample size calculation*

24  
25 118 In a previous meta-analysis study in which pain relief was compared between EA  
26  
27 119 groups and controls, the minimal mean difference of the two groups based on the VAS  
28  
29 120 score was -1.14 (95% CI, -1.90 to -0.38), and the standard deviation was estimated to  
30  
31 121 be 2.<sup>8</sup> Considering a dropout rate of 10%, 110 patients are required to yield a power  
32  
33 122 of 80% with a significance level of 0.05.<sup>14</sup>  
34  
35  
36  
37

### 38 123 *Randomisation and allocation concealment*

39  
40 124 One hundred and ten patients will be divided into EA and Sham-EA groups with a  
41  
42 125 ratio of 1:1. An independent biostatistician will generate a random sequence using the  
43  
44 126 R (version 3.4.4). A sequence of numbers will be prepared and sealed in an opaque  
45  
46 127 envelope. Only the acupuncturist will be allowed to open the envelope to obtain the  
47  
48 128 grouping code.  
49  
50

### 51 129 *Single-blinding*

52  
53  
54  
55 130 The acupuncturist will be blinded to the grouping information in advance, and the  
56  
57  
58  
59  
60



1  
2  
3 131 treatment method according to the grouping information contained in envelopes. All  
4  
5  
6 132 participants, orthopaedic surgeons, and relevant healthcare staff will be blinded to the  
7  
8 133 study. The outcome assessor will not be aware of the treatment that patients received  
9  
10  
11 134 and will only instruct the patient to fill in the scales. The independent biostatistician  
12  
13 135 will also be blinded when performing the statistical analyses. To maximize the  
14  
15 136 blinding of patients, an effective sham electroacupuncture method will be applied  
16  
17 137 with adhesive pads, a dull-tipped placebo needle, and a sham electrical stimulation  
18  
19  
20 138 device. Details of the sham operation design are described in the following part.

21  
22  
23 139 *Eligibility criteria*

24  
25 140 *Eligible*

26  
27  
28 141 (1) Aged 55 to 80 years; (2) Meet the 1995 American College of Rheumatology  
29  
30 142 (ACR) diagnostic criteria for osteoarthritis; (3) Undergoing unilateral total knee  
31  
32 143 arthroplasty under general anaesthesia without surgical contraindications; (4)  
33  
34  
35 144 American Society of Anesthesiologists (ASA) Grade I or II.

36  
37 145 *Ineligible*

38  
39  
40 146 (1) The area of acupuncture points has skin damage and cannot perform  
41  
42 147 acupuncture; (2) Preoperative deep venous thrombosis or swelling of the lower  
43  
44 148 extremities; (3) Severe arrhythmia, heart failure, chronic obstructive pulmonary  
45  
46  
47 149 disease, epilepsy, mental disease; (4) Received treatment of acupuncture in past 1  
48  
49  
50 150 month.

51  
52 151 *Study interventions*

53  
54  
55 152 *EA group*

1  
2  
3  
4 153 Patients will receive early acupuncture analgesia once a day from 24 to 72 hours  
5  
6 154 after surgery. The first session of acupuncture treatment will be performed at 24 hours  
7  
8 155 postoperatively. Firstly, the adhesive pads will be put on the acupoints of bilateral  
9  
10 156 *Futu* (Stomach 32, ST32), *Zusanli* (Stomach 36, ST36), *Yanglingquan* (Gall Bladder  
11  
12 157 34, GB34), and *Yinlingquan* (Spleen 9, SP9). 1.5 *cun* acupuncture needles  
13  
14 158 (0.25×40mm, Huatuo Inc.) will be manually inserted into the skin through the  
15  
16 159 adhesive pads (Figure. 2). When *De-qi* sensation is achieved, subsequent electrical  
17  
18 160 stimulation with a frequency of 2Hz, a continuous wave and tolerable intensity by the  
19  
20 161 patient will be applied to the four acupoints (GB 34 to ST32 and ST36 to SP9).  
21  
22 162 Needles with electrical stimulation will be retained for 20 minutes in each session.  
23  
24 163 The patients will receive a total of 3 treatments which were given once a day.  
25  
26  
27  
28  
29

#### 30 164 *Sham-EA group*

31  
32  
33 165 Similar to the EA group, three sessions of acupuncture will be provided at the  
34  
35 166 same time. An adhesive pad will be put on the sham-acupoint which is 20 mm distal  
36  
37 167 to the real acupoint (Figure. 3). The placebo needle has a blunt-tip and it will be  
38  
39 168 manually inserted into the adhesive pads but without skin penetration to provide  
40  
41 169 participant-blinding effects (Figure. 2). The sham electrical stimulation device will  
42  
43 170 have a connecting cord with a broken inner wire with no actual current output.  
44  
45 171 Needles will also be retained for 20 minutes in each session. The patients will receive  
46  
47 172 a total of 3 sham treatments which were given once a day. This Sham-EA method was  
48  
49 173 proved to be effective in a previous study.<sup>15</sup>  
50  
51  
52  
53

#### 54 174 *Postoperative analgesia*

1  
2  
3  
4 175 All patients will receive the same analgesic procedure. Fentanyl  
5  
6 176 patient-controlled analgesia (PCA) will be used at a continuous infusion rate of 0.25  
7  
8 177  $\mu\text{g}/(\text{kg}\cdot\text{h})$  and a bolus of 0.15  $\mu\text{g}/\text{kg}$  with a 10-minute lockout time. Patients will be  
9  
10 178 allowed to use Celebrex 200 mg per day. Besides, additional rescue doses of  
11  
12 179 analgesics will be provided upon demand for patients with a VAS score above 60.

13  
14  
15  
16 180 *Discontinuing criteria*

17  
18 181 (1) Acupuncture cannot be tolerated after surgery or patients that cannot be  
19  
20 182 implemented according to the protocol; (2) Severe physiological and pathological  
21  
22 183 changes were found during surgery and it is not appropriate to receive acupuncture  
23  
24 184 treatment; (3) Patients in which the trial arrangement cannot be completed or the  
25  
26 185 safety judgment is affected due to surgical factors after the test; (4) Severe adverse  
27  
28 186 reactions, severe complications, and patients with rapid deterioration.

29  
30  
31  
32  
33 187

34  
35 188 *Outcome*

36  
37 189 *Primary outcome*

38  
39 190 *Pain*

40  
41  
42 191 When the patients are discharged from the operating room, this will be recorded  
43  
44 192 as 0 hours. Outcome assessors will record VAS at 6, 24, 48, and 72 hours after surgery.  
45  
46 193 Patients can use a 100 mm visual analogue scale to assess the pain of their knee (from  
47  
48 194 no symptoms to very severe). Additional PCA dose requirement will be evaluated in  
49  
50 195 this study to reflect the degree of pain. Patients will be trained to adjust the PCA to  
51  
52 196 obtain an additional dose of analgesia depending on the degree of pain. This will be  
53  
54  
55  
56  
57  
58  
59  
60

1  
2  
3 197 recorded 48 hours after surgery. Patients will be given an additional dose of analgesia  
4  
5  
6 198 upon demand if the VAS score is above 60. The additional use of analgesics within 2  
7  
8  
9 199 weeks after surgery will be recorded in the case report forms.

10 200 *Secondary outcome*

11  
12  
13 201 *Knee function and swelling*

14  
15 202 Knee function will be measured based on Hospital for Special Surgery Knee  
16  
17  
18 203 Score (HSS score) at one day before surgery and three days after surgery. All patients  
19  
20  
21 204 will first educated about the HSS score by a trained researcher until they fully  
22  
23  
24 205 understand the questionnaire, then asked to complete the form according to their  
25  
26 206 actual conditions. At 24 hours after surgery, the outcome assessor will remove the  
27  
28 207 elastic bandage and measure the circumference of the knee at the superior patellar  
29  
30 208 pole. A second measurement will be performed 72 hours after surgery. According to  
31  
32  
33 209 previous reports, electroacupuncture has the potential to promote functional  
34  
35 210 rehabilitation.

36  
37  
38 211 *Perioperative anxiety*

39  
40 212 Perioperative anxiety will be measured by the Hamilton Anxiety Scale (HAMA)  
41  
42  
43 213 at one day before surgery and three days after surgery. HAMA has 14 levels to assess  
44  
45 214 the severity of a patient's anxiety, and it divides anxiety into physical (7~13) and  
46  
47 215 spiritual (1~6 and 14).

48  
49  
50 216 *Postoperative nausea and vomiting (PONV)*

51  
52 217 PONV will be measured according to vomiting symptoms scores in 4-time points,  
53  
54  
55 218 including on the day of surgery and 1, 2, 3 days after surgery.<sup>16</sup> Functional Living  
56  
57  
58  
59  
60

1  
2  
3  
4 219 Index-Emesis is used to evaluate the effect of PONV on the quality of life, and it will  
5  
6 220 be measured 3 days after surgery.<sup>17</sup>  
7

8 221 *Postoperative complications and adverse events*  
9

10 222 All expected and unexpected adverse events will be measured during the  
11  
12  
13 223 allocated intervention process and during the entire study period. Common adverse  
14  
15  
16 224 events are fainting, needle sticking or breaking during acupuncture and acupuncture  
17  
18 225 hematomas. Other postoperative complications including incision infection, urinary  
19  
20  
21 226 retention, deep vein thrombosis, and postoperative persistent pain will be recorded 6  
22  
23 227 weeks after surgery. All serious adverse events (SAEs) will be reported immediately  
24  
25  
26 228 to the sponsor to allow further investigations into their causes.  
27

28 229 *Data management*  
29

30 230 Data entry will be conducted by two independent trained research assistants using  
31  
32  
33 231 paper CRFs to record the research data after completion of final data collection. As  
34  
35  
36 232 acupuncture has known minimal risks, a formal data monitoring committee will not  
37  
38 233 be required.<sup>6,18</sup> Independent investigators of the hospital staff will monitor and audit  
39  
40  
41 234 the data periodically.  
42

43 235 *Statistical analysis*  
44

45 236 According to the intention to treat (ITT) principle, full analysis set (FAS) and  
46  
47  
48 237 per-protocol set (PPS) will be used for primary analysis. Safety set (SS) will not be  
49  
50  
51 238 required since acupuncture has minimal risks.<sup>6,18</sup> Sensitivity analysis will be  
52  
53 239 performed to determine the impact of incomplete records on results. Missing data will  
54  
55 240 not be imputed. Statistical analysis will be performed using R (version 3.4.4). The  
56  
57  
58  
59  
60

1  
2  
3  
4 241 difference between the two groups will be calculated and compared using the t-test if  
5  
6 242 the Shapiro-Wilk test showed that the data is normally distributed, otherwise the  
7  
8 243 Mann-Whitney U test will be used. A Pearson  $\chi^2$  or Fisher's exact test will be used to  
9  
10  
11 244 calculate the differences in the enumeration data. Mixed effects models will be used  
12  
13 245 to analyze the trend of changes in VAS scores with two factors of groups and time.<sup>19</sup>

#### 15 246 *Ethics and dissemination*

17  
18 247 This study has been approved by the ethics committee of Shanghai Guanghua  
19  
20 248 Hospital of Integrated Chinese and Western Medicine (approval number AF13v2-2),  
21  
22  
23 249 and any modification of the protocol will be reported and approved by it. Written  
24  
25 250 inform consent will be obtained from all participants or their authorized agents. All  
26  
27  
28 251 electroacupuncture treatments will be free and the research data will be strictly  
29  
30 252 confidential. The result of the trial will be presented on the website of the Chinese  
31  
32  
33 253 Clinical Trial Registry and published in peer-reviewed journals.

#### 34 254 *Patient and Public Involvement*

35  
36  
37 255 Patient and public were not involved in the design of this study. The participants  
38  
39  
40 256 will be informed of the result of this study during the follow-up visit. Besides, we will  
41  
42  
43 257 enlist their help in disseminating the research findings.

#### 44 258 **Discussion**

45  
46  
47 259 Multiple evidence-based ERAS strategies for TKA have been shown to reduce  
48  
49  
50 260 postoperative complications and improve the prognosis and patient satisfaction.  
51  
52 261 Postoperative pain after TKA is mostly caused by postoperative functional exercise.  
53  
54  
55 262 Drug-free interventions, especially EA, are highly effective in pain relief and  
56  
57  
58  
59  
60

1  
2  
3 263 promoting functional rehabilitation. The minimal clinically important difference  
4  
5  
6 264 (MCID) is a measure that is used to evaluate the clinical significance of an  
7  
8  
9 265 intervention. In the case of standardized multimodal analgesia, the MCID for VAS of  
10  
11 266 postoperative pain after TKA is -2.26, and the MCID can be used to evaluate the  
12  
13 267 effect of Sham-EA.<sup>20</sup> Further research is required to determine whether a single EA  
14  
15  
16 268 without multimodal analgesia may provide enough analgesia for the patients after  
17  
18 269 TKA. We suggest incorporation of EA as a routine treatment in ERAS strategies for  
19  
20  
21 270 TKA. EA may also be used as a new analgesia to replace opioids usage.  
22  
23  
24  
25  
26  
27

271

272

273 **Reference**

- 274 1 Veal FC, Bereznicki LRE, Thompson AJ, *et al.* Subacute Pain as a Predictor of  
275 Long-Term Pain Following Orthopedic Surgery: An Australian Prospective 12  
276 Month Observational Cohort Study. *Medicine (Baltimore)* 2015;**94**:e1498.  
277 doi:10.1097/MD.0000000000001498  
278 2 Beswick AD, Wylde V, Goberman-Hill R, *et al.* What proportion of patients  
279 report long-term pain after total hip or knee replacement for osteoarthritis? A  
280 systematic review of prospective studies in unselected patients. *BMJ Open*  
281 2012;**2**:e000435. doi:10.1136/bmjopen-2011-000435  
282 3 Han C, Li X, Jiang H, *et al.* The use of gabapentin in the management of  
283 postoperative pain after total knee arthroplasty. *Medicine (Baltimore)*  
284 2016;**95**:e3883. doi:10.1097/MD.0000000000003883

- 1  
2  
3  
4 285 4 Katz J, Buis T, Cohen L. Locked out and still knocking: predictors of excessive  
5  
6 286 demands for postoperative intravenous patient-controlled analgesia. *Can J*  
7  
8 287 *Anesth Can d'anesthésie* 2008;**55**:88–99. doi:10.1007/BF03016320  
9  
10  
11 288 5 Ntritsou V, Mavrommatis C, Kostoglou C, *et al.* Effect of perioperative  
12  
13 289 electroacupuncture as an adjunctive therapy on postoperative analgesia with  
14  
15 290 tramadol and ketamine in prostatectomy: a randomised sham-controlled  
16  
17 291 single-blind trial. *Acupunct Med* 2014;**32**:215–22.  
18  
19 292 doi:10.1136/acupmed-2013-010498  
20  
21  
22  
23 293 6 Manheimer E, Cheng K, Linde K, *et al.* Acupuncture for peripheral joint  
24  
25 294 osteoarthritis. *Cochrane Database Syst Rev* Published Online First: 20 January  
26  
27 295 2010. doi:10.1002/14651858.CD001977.pub2  
28  
29  
30 296 7 Ju ZY, Wang K, Cui HS, *et al.* Acupuncture for neuropathic pain in adults.  
31  
32 297 *Cochrane Database Syst Rev* Published Online First: 2 December 2017.  
33  
34 298 doi:10.1002/14651858.CD012057.pub2  
35  
36  
37  
38 299 8 Tedesco D, Gori D, Desai KR, *et al.* Drug-Free Interventions to Reduce Pain or  
39  
40 300 Opioid Consumption After Total Knee Arthroplasty. *JAMA Surg*  
41  
42 301 2017;**152**:e172872. doi:10.1001/jamasurg.2017.2872  
43  
44  
45 302 9 Zhang R, Lao L, Ren K, *et al.* Mechanisms of acupuncture-electroacupuncture  
46  
47 303 on persistent pain. 2014. doi:10.1097/ALN.000000000000101  
48  
49  
50 304 10 Tinnermann A, Geuter S, Sprenger C, *et al.* Interactions between brain and  
51  
52 305 spinal cord mediate value effects in placebo hyperalgesia. *Science (80-*  
53  
54 306 *)* 2017;**358**:105–8. doi:10.1126/science.aan1221  
55  
56  
57  
58  
59  
60



- 1  
2  
3  
4 307 11 Bliss TVP, Collingridge GL, Kaang B-K, *et al.* Synaptic plasticity in the  
5  
6 308 anterior cingulate cortex in acute and chronic pain. *Nat Rev Neurosci*  
7  
8 309 2016;**17**:485–96. doi:10.1038/nrn.2016.68  
9  
10  
11 310 12 Pogatzki-zahn EM, Segelcke D, Schug SA. Postoperative pain — from  
12  
13 311 mechanisms to treatment. *PAIN Reports* 2017;**2**:e588.  
14  
15 312 doi:10.1097/PR9.0000000000000588  
16  
17  
18 313 13 Grahl A, Onat S, Büchel C. The periaqueductal gray and Bayesian integration  
19  
20 314 in placebo analgesia. *Elife* 2018;**7**. doi:10.7554/eLife.32930  
21  
22  
23 315 14 Chow SC, Wang H, Shao J. *Sample Size Calculations in Clinical Research,*  
24  
25 316 *Second Edition.* Taylor & Francis 2007.  
26  
27  
28 317 15 Liu Z, Liu Y, Xu H, *et al.* Effect of Electroacupuncture on Urinary Leakage  
29  
30 318 Among Women With Stress Urinary Incontinence. *Jama* 2017;**317**:2493.  
31  
32 319 doi:10.1001/jama.2017.7220  
33  
34  
35 320 16 Hesketh PJ, Kris MG, Grunberg SM, *et al.* Proposal for classifying the acute  
36  
37 321 emetogenicity of cancer chemotherapy. *J Clin Oncol* 1997;**15**:103–9.  
38  
39 322 doi:10.1200/JCO.1997.15.1.103  
40  
41  
42 323 17 Lindley CM, Hirsch JD, O’Neill C V., *et al.* Quality of life consequences of  
43  
44 324 emesis. *Qual Life Res* 1992;**1**:331–40.  
45  
46  
47 325 18 Witt CM, Pach D, Brinkhaus B, *et al.* Safety of Acupuncture: Results of a  
48  
49 326 Prospective Observational Study with 229,230 Patients and Introduction of a  
50  
51 327 Medical Information and Consent Form. *Complement Med Res* 2009;**16**:91–7.  
52  
53 328 doi:10.1159/000209315  
54  
55  
56  
57  
58  
59  
60

- 1  
2  
3 329 19 Detry M, Ma Y. Analyzing repeated measurements using mixed models. *Jama*  
4  
5  
6 330 2016;**315**:407–8. doi:10.1001/jama.2015  
7  
8 331 20 Danoff JR, Goel R, Sutton R, *et al.* How Much Pain Is Significant? Defining  
9  
10 332 the Minimal Clinically Important Difference for the Visual Analog Scale for  
11  
12  
13 333 Pain After Total Joint Arthroplasty. *J Arthroplasty* 2018;**33**:S71–S75.e2.  
14  
15  
16 334 doi:10.1016/j.arth.2018.02.029  
17  
18 335  
19  
20 336  
21  
22  
23  
24  
25  
26  
27  
28  
29  
30  
31  
32  
33  
34  
35  
36  
37  
38  
39  
40  
41  
42  
43  
44  
45  
46  
47  
48  
49  
50  
51  
52  
53  
54  
55  
56  
57  
58  
59  
60

337

Table 1. The schedule of trial enrolment, interventions and assessments

|                                                | Enrolment | Intervention period |          |          |          |
|------------------------------------------------|-----------|---------------------|----------|----------|----------|
|                                                | Pre-OP    | 6 hours             | 24 hours | 48 hours | 72 hours |
| Enrolment                                      |           |                     |          |          |          |
| Informed consent                               | •         |                     |          |          |          |
| Assessment of eligibility                      | •         |                     |          |          |          |
| Randomisation                                  | •         |                     |          |          |          |
| Interventions                                  |           |                     |          |          |          |
| EA                                             | •         | •                   | •        | •        | •        |
| Sham-EA                                        | •         |                     |          |          |          |
| Assessments                                    |           |                     |          |          |          |
| VAS                                            | •         | •                   | •        | •        | •        |
| Additional dose released by PCA                |           |                     |          | •        |          |
| HSS score                                      | •         |                     |          |          | •        |
| HAMA score                                     | •         |                     |          |          | •        |
| PONV                                           |           | •                   | •        | •        | •        |
| COK                                            |           |                     | •        |          | •        |
| Additional use of analgesics                   | •         |                     |          |          | •        |
| Postoperative complications and adverse events |           | •                   | •        | •        | •        |

OP, operation; EA, electroacupuncture; VAS, Visual Analogue Score; PCA, patient controlled analgesia; HSS, hospital for special surgery; HAMA, Hamilton Anxiety Scale; PONV, post-operative nausea and vomiting; COK, circumference of knee

338

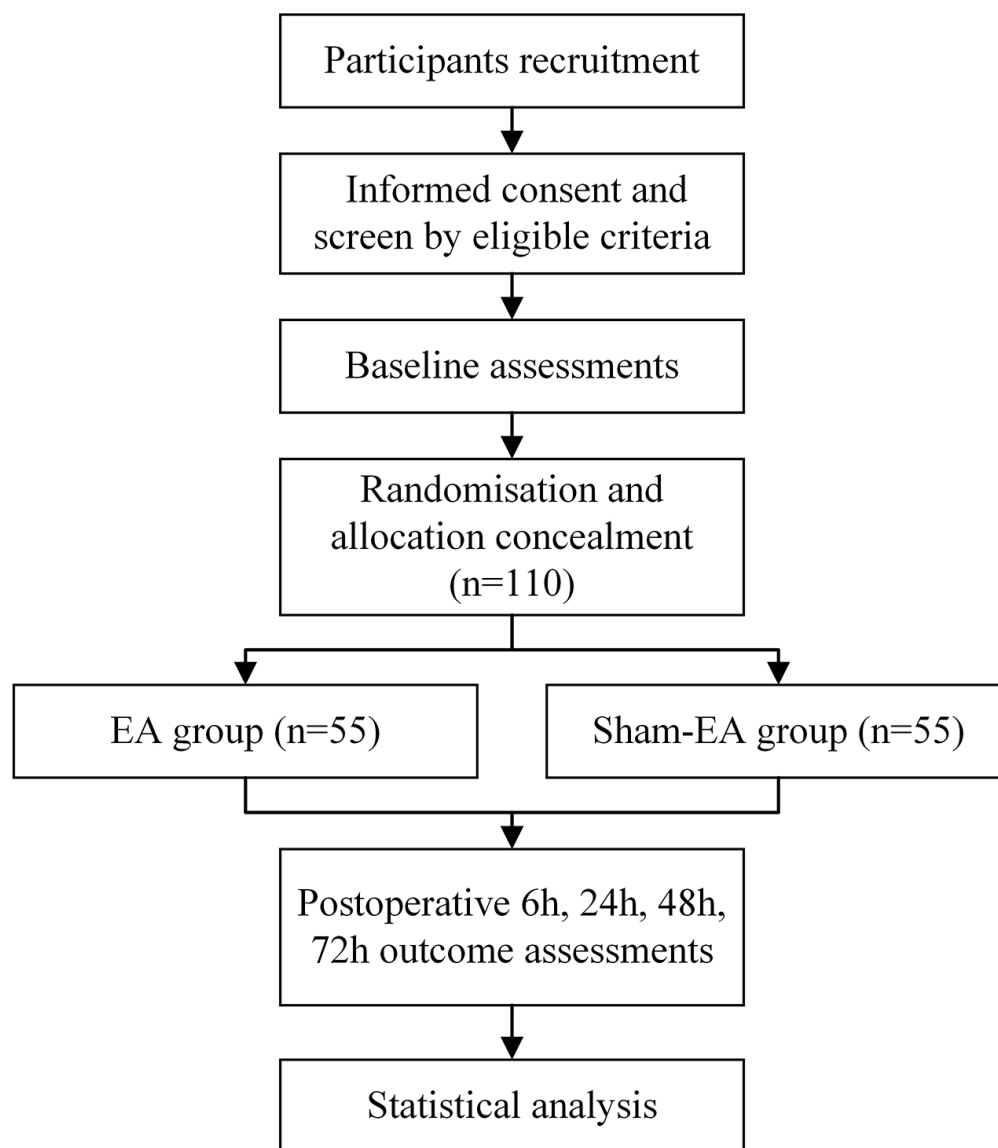

43 Figure 1. Study flow diagram, including participants recruitment, eligibility, screening, randomization,  
44 allocation concealment, and outcome assessments. EA, electroacupuncture.

45 107x122mm (300 x 300 DPI)

1  
2  
3  
4  
5  
6  
7  
8  
9  
10  
11  
12  
13  
14  
15  
16  
17  
18  
19  
20  
21  
22  
23  
24  
25  
26  
27  
28  
29  
30  
31  
32  
33  
34  
35  
36  
37  
38  
39  
40  
41  
42  
43  
44  
45  
46  
47  
48  
49  
50  
51  
52  
53  
54  
55  
56  
57  
58  
59  
60

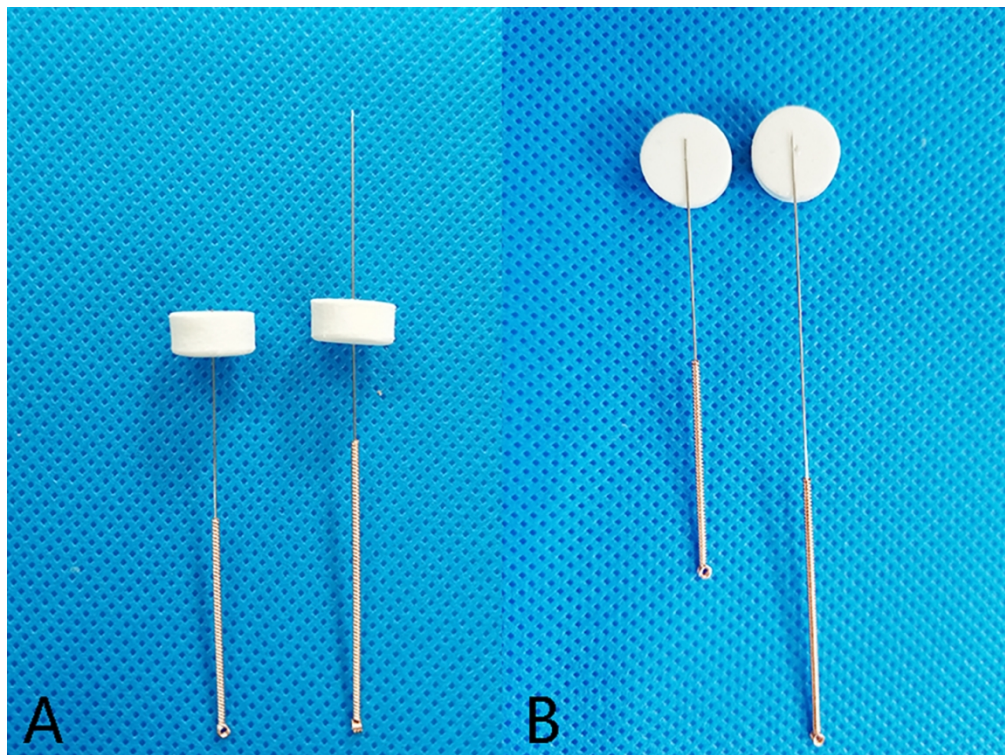

Figure 2. The difference between acupuncture needle and placebo. (A) The placebo needle (left) to be inserted into the adhesive pads and the tip can irritate the skin. The acupuncture needle (right) to be inserted into the skin through the adhesive pads. (B) The tip of the placebo needle (left) is blunt.

119x90mm (300 x 300 DPI)

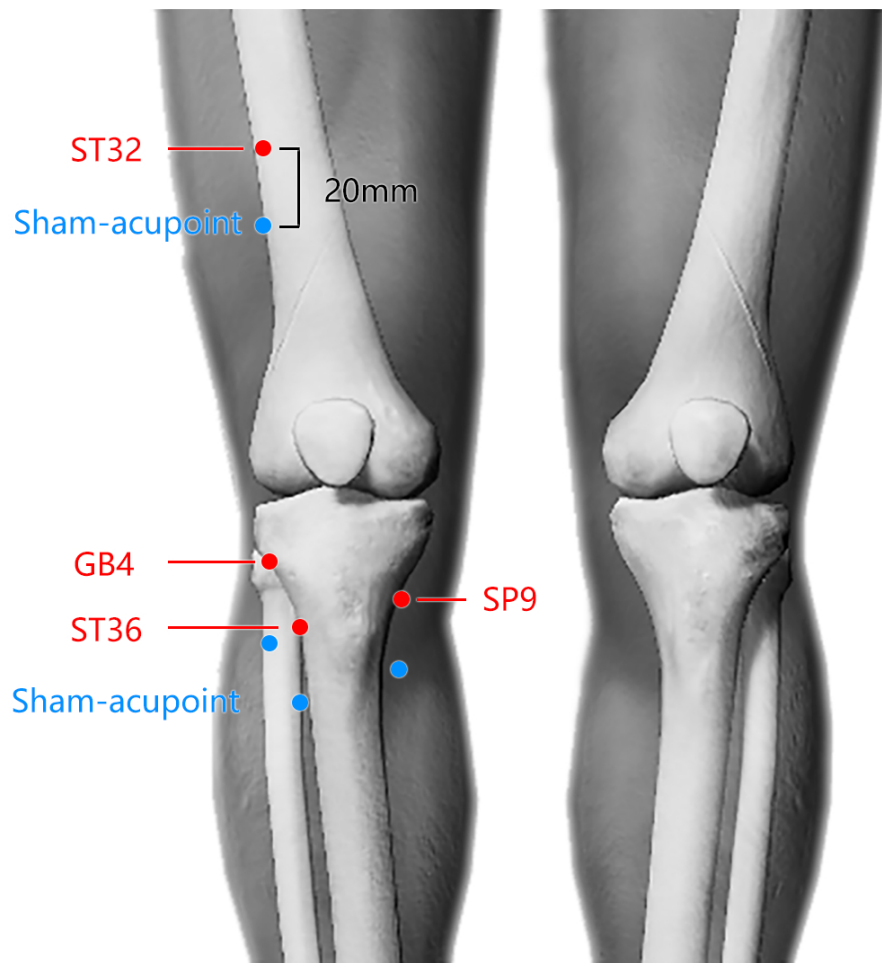

Figure 3. Location of acupoints for the electroacupuncture and sham electroacupuncture groups. ST32, Stomach 32; GB4, Gall Bladder 34; ST36, Stomach 36; SP9, Spleen 9.

94x90mm (300 x 300 DPI)

# Reporting checklist for protocol of a clinical trial.

Based on the SPIRIT guidelines.

## Instructions to authors

Complete this checklist by entering the page numbers from your manuscript where readers will find each of the items listed below.

Your article may not currently address all the items on the checklist. Please modify your text to include the missing information. If you are certain that an item does not apply, please write "n/a" and provide a short explanation.

Upload your completed checklist as an extra file when you submit to a journal.

In your methods section, say that you used the SPIRIT reporting guidelines, and cite them as:

Chan A-W, Tetzlaff JM, Altman DG, Laupacis A, Gøtzsche PC, Krleža-Jerić K, Hróbjartsson A, Mann H, Dickersin K, Berlin J, Doré C, Parulekar W, Summerskill W, Groves T, Schulz K, Sox H, Rockhold FW, Rennie D, Moher D. SPIRIT 2013 Statement: Defining standard protocol items for clinical trials. *Ann Intern Med.* 2013;158(3):200-207

|                                             |     | Reporting Item                                                                                               | Page Number |
|---------------------------------------------|-----|--------------------------------------------------------------------------------------------------------------|-------------|
| Title                                       | #1  | Descriptive title identifying the study design, population, interventions, and, if applicable, trial acronym | 1           |
| Trial registration                          | #2a | Trial identifier and registry name. If not yet registered, name of intended registry                         | 1           |
| Trial registration: data set                | #2b | All items from the World Health Organization Trial Registration Data Set                                     | 1           |
| Protocol version                            | #3  | Date and version identifier                                                                                  | 1           |
| Funding                                     | #4  | Sources and types of financial, material, and other support                                                  | 13          |
| Roles and responsibilities: contributorship | #5a | Names, affiliations, and roles of protocol contributors                                                      | 1-2         |
| Roles and responsibilities:                 | #5b | Name and contact information for the trial sponsor                                                           | n/a         |

|    |                      |      |                                                                   |     |
|----|----------------------|------|-------------------------------------------------------------------|-----|
| 1  | sponsor contact      |      |                                                                   |     |
| 2  | information          |      |                                                                   |     |
| 3  |                      |      |                                                                   |     |
| 4  | Roles and            | #5c  | Role of study sponsor and funders, if any, in study design;       | 13  |
| 5  | responsibilities:    |      | collection, management, analysis, and interpretation of           |     |
| 6  | sponsor and funder   |      | data; writing of the report; and the decision to submit the       |     |
| 7  |                      |      | report for publication, including whether they will have          |     |
| 8  |                      |      | ultimate authority over any of these activities                   |     |
| 9  |                      |      |                                                                   |     |
| 10 |                      |      |                                                                   |     |
| 11 |                      |      |                                                                   |     |
| 12 | Roles and            | #5d  | Composition, roles, and responsibilities of the coordinating      | n/a |
| 13 | responsibilities:    |      | centre, steering committee, endpoint adjudication                 |     |
| 14 | committees           |      | committee, data management team, and other individuals or         |     |
| 15 |                      |      | groups overseeing the trial, if applicable (see Item 21a for      |     |
| 16 |                      |      | data monitoring committee)                                        |     |
| 17 |                      |      |                                                                   |     |
| 18 |                      |      |                                                                   |     |
| 19 |                      |      |                                                                   |     |
| 20 | Background and       | #6a  | Description of research question and justification for            | 4   |
| 21 | rationale            |      | undertaking the trial, including summary of relevant studies      |     |
| 22 |                      |      | (published and unpublished) examining benefits and harms          |     |
| 23 |                      |      | for each intervention                                             |     |
| 24 |                      |      |                                                                   |     |
| 25 |                      |      |                                                                   |     |
| 26 |                      |      |                                                                   |     |
| 27 | Background and       | #6b  | Explanation for choice of comparators                             | 4   |
| 28 | rationale: choice of |      |                                                                   |     |
| 29 | comparators          |      |                                                                   |     |
| 30 |                      |      |                                                                   |     |
| 31 |                      |      |                                                                   |     |
| 32 | Objectives           | #7   | Specific objectives or hypotheses                                 | 3   |
| 33 |                      |      |                                                                   |     |
| 34 |                      |      |                                                                   |     |
| 35 | Trial design         | #8   | Description of trial design including type of trial (eg, parallel | 3   |
| 36 |                      |      | group, crossover, factorial, single group), allocation ratio,     |     |
| 37 |                      |      | and framework (eg, superiority, equivalence, non-inferiority,     |     |
| 38 |                      |      | exploratory)                                                      |     |
| 39 |                      |      |                                                                   |     |
| 40 |                      |      |                                                                   |     |
| 41 |                      |      |                                                                   |     |
| 42 | Study setting        | #9   | Description of study settings (eg, community clinic,              | 5-6 |
| 43 |                      |      | academic hospital) and list of countries where data will be       |     |
| 44 |                      |      | collected. Reference to where list of study sites can be          |     |
| 45 |                      |      | obtained                                                          |     |
| 46 |                      |      |                                                                   |     |
| 47 |                      |      |                                                                   |     |
| 48 | Eligibility criteria | #10  | Inclusion and exclusion criteria for participants. If applicable, | 7   |
| 49 |                      |      | eligibility criteria for study centres and individuals who will   |     |
| 50 |                      |      | perform the interventions (eg, surgeons, psychotherapists)        |     |
| 51 |                      |      |                                                                   |     |
| 52 |                      |      |                                                                   |     |
| 53 |                      |      |                                                                   |     |
| 54 | Interventions:       | #11a | Interventions for each group with sufficient detail to allow      | 7-8 |
| 55 | description          |      | replication, including how and when they will be                  |     |
| 56 |                      |      | administered                                                      |     |
| 57 |                      |      |                                                                   |     |
| 58 |                      |      |                                                                   |     |
| 59 |                      |      |                                                                   |     |
| 60 |                      |      |                                                                   |     |



|    |                      |      |                                                                  |    |
|----|----------------------|------|------------------------------------------------------------------|----|
| 1  | Interventions:       | #11b | Criteria for discontinuing or modifying allocated                | 9  |
| 2  | modifications        |      | interventions for a given trial participant (eg, drug dose       |    |
| 3  |                      |      | change in response to harms, participant request, or             |    |
| 4  |                      |      | improving / worsening disease)                                   |    |
| 5  |                      |      |                                                                  |    |
| 6  |                      |      |                                                                  |    |
| 7  |                      |      |                                                                  |    |
| 8  | Interventions:       | #11c | Strategies to improve adherence to intervention protocols,       | 9  |
| 9  | adherence            |      | and any procedures for monitoring adherence (eg, drug            |    |
| 10 |                      |      | tablet return; laboratory tests)                                 |    |
| 11 |                      |      |                                                                  |    |
| 12 |                      |      |                                                                  |    |
| 13 | Interventions:       | #11d | Relevant concomitant care and interventions that are             | 9  |
| 14 | concomitant care     |      | permitted or prohibited during the trial                         |    |
| 15 |                      |      |                                                                  |    |
| 16 |                      |      |                                                                  |    |
| 17 | Outcomes             | #12  | Primary, secondary, and other outcomes, including the            | 9  |
| 18 |                      |      | specific measurement variable (eg, systolic blood pressure),     |    |
| 19 |                      |      | analysis metric (eg, change from baseline, final value, time     |    |
| 20 |                      |      | to event), method of aggregation (eg, median, proportion),       |    |
| 21 |                      |      | and time point for each outcome. Explanation of the clinical     |    |
| 22 |                      |      | relevance of chosen efficacy and harm outcomes is strongly       |    |
| 23 |                      |      | recommended                                                      |    |
| 24 |                      |      |                                                                  |    |
| 25 |                      |      |                                                                  |    |
| 26 |                      |      |                                                                  |    |
| 27 |                      |      |                                                                  |    |
| 28 | Participant timeline | #13  | Time schedule of enrolment, interventions (including any         | 17 |
| 29 |                      |      | run-ins and washouts), assessments, and visits for               |    |
| 30 |                      |      | participants. A schematic diagram is highly recommended          |    |
| 31 |                      |      | (see Figure)                                                     |    |
| 32 |                      |      |                                                                  |    |
| 33 |                      |      |                                                                  |    |
| 34 |                      |      |                                                                  |    |
| 35 | Sample size          | #14  | Estimated number of participants needed to achieve study         | 6  |
| 36 |                      |      | objectives and how it was determined, including clinical and     |    |
| 37 |                      |      | statistical assumptions supporting any sample size               |    |
| 38 |                      |      | calculations                                                     |    |
| 39 |                      |      |                                                                  |    |
| 40 |                      |      |                                                                  |    |
| 41 |                      |      |                                                                  |    |
| 42 | Recruitment          | #15  | Strategies for achieving adequate participant enrolment to       | 6  |
| 43 |                      |      | reach target sample size                                         |    |
| 44 |                      |      |                                                                  |    |
| 45 |                      |      |                                                                  |    |
| 46 | Allocation: sequence | #16a | Method of generating the allocation sequence (eg,                | 6  |
| 47 | generation           |      | computer-generated random numbers), and list of any              |    |
| 48 |                      |      | factors for stratification. To reduce predictability of a random |    |
| 49 |                      |      | sequence, details of any planned restriction (eg, blocking)      |    |
| 50 |                      |      | should be provided in a separate document that is                |    |
| 51 |                      |      | unavailable to those who enrol participants or assign            |    |
| 52 |                      |      | interventions                                                    |    |
| 53 |                      |      |                                                                  |    |
| 54 |                      |      |                                                                  |    |
| 55 |                      |      |                                                                  |    |
| 56 |                      |      |                                                                  |    |
| 57 | Allocation           | #16b | Mechanism of implementing the allocation sequence (eg,           | 6  |
| 58 | concealment          |      | central telephone; sequentially numbered, opaque, sealed         |    |
| 59 |                      |      |                                                                  |    |
| 60 |                      |      |                                                                  |    |

|    |                        |      |                                                                |     |
|----|------------------------|------|----------------------------------------------------------------|-----|
| 1  | mechanism              |      | envelopes), describing any steps to conceal the sequence       |     |
| 2  |                        |      | until interventions are assigned                               |     |
| 3  |                        |      |                                                                |     |
| 4  | Allocation:            | #16c | Who will generate the allocation sequence, who will enrol      | 6   |
| 5  | implementation         |      | participants, and who will assign participants to              |     |
| 6  |                        |      | interventions                                                  |     |
| 7  |                        |      |                                                                |     |
| 8  |                        |      |                                                                |     |
| 9  | Blinding (masking)     | #17a | Who will be blinded after assignment to interventions (eg,     | 6-7 |
| 10 |                        |      | trial participants, care providers, outcome assessors, data    |     |
| 11 |                        |      | analysts), and how                                             |     |
| 12 |                        |      |                                                                |     |
| 13 |                        |      |                                                                |     |
| 14 | Blinding (masking):    | #17b | If blinded, circumstances under which unblinding is            | 6-7 |
| 15 | emergency              |      | permissible, and procedure for revealing a participant's       |     |
| 16 | unblinding             |      | allocated intervention during the trial                        |     |
| 17 |                        |      |                                                                |     |
| 18 |                        |      |                                                                |     |
| 19 |                        |      |                                                                |     |
| 20 | Data collection plan   | #18a | Plans for assessment and collection of outcome, baseline,      | 11  |
| 21 |                        |      | and other trial data, including any related processes to       |     |
| 22 |                        |      | promote data quality (eg, duplicate measurements, training     |     |
| 23 |                        |      | of assessors) and a description of study instruments (eg,      |     |
| 24 |                        |      | questionnaires, laboratory tests) along with their reliability |     |
| 25 |                        |      | and validity, if known. Reference to where data collection     |     |
| 26 |                        |      | forms can be found, if not in the protocol                     |     |
| 27 |                        |      |                                                                |     |
| 28 |                        |      |                                                                |     |
| 29 |                        |      |                                                                |     |
| 30 |                        |      |                                                                |     |
| 31 | Data collection plan:  | #18b | Plans to promote participant retention and complete follow-    | 11  |
| 32 | retention              |      | up, including list of any outcome data to be collected for     |     |
| 33 |                        |      | participants who discontinue or deviate from intervention      |     |
| 34 |                        |      | protocols                                                      |     |
| 35 |                        |      |                                                                |     |
| 36 |                        |      |                                                                |     |
| 37 |                        |      |                                                                |     |
| 38 | Data management        | #19  | Plans for data entry, coding, security, and storage, including | 11  |
| 39 |                        |      | any related processes to promote data quality (eg, double      |     |
| 40 |                        |      | data entry; range checks for data values). Reference to        |     |
| 41 |                        |      | where details of data management procedures can be             |     |
| 42 |                        |      | found, if not in the protocol                                  |     |
| 43 |                        |      |                                                                |     |
| 44 |                        |      |                                                                |     |
| 45 |                        |      |                                                                |     |
| 46 | Statistics: outcomes   | #20a | Statistical methods for analysing primary and secondary        | 11  |
| 47 |                        |      | outcomes. Reference to where other details of the statistical  |     |
| 48 |                        |      | analysis plan can be found, if not in the protocol             |     |
| 49 |                        |      |                                                                |     |
| 50 |                        |      |                                                                |     |
| 51 | Statistics: additional | #20b | Methods for any additional analyses (eg, subgroup and          | 11  |
| 52 | analyses               |      | adjusted analyses)                                             |     |
| 53 |                        |      |                                                                |     |
| 54 |                        |      |                                                                |     |
| 55 | Statistics: analysis   | #20c | Definition of analysis population relating to protocol non-    | 11  |
| 56 | population and         |      | adherence (eg, as randomised analysis), and any statistical    |     |
| 57 | missing data           |      | methods to handle missing data (eg, multiple imputation)       |     |
| 58 |                        |      |                                                                |     |
| 59 |                        |      |                                                                |     |
| 60 |                        |      |                                                                |     |

|    |                    |      |                                                                  |     |
|----|--------------------|------|------------------------------------------------------------------|-----|
| 1  | Data monitoring:   | #21a | Composition of data monitoring committee (DMC); summary          | n/a |
| 2  | formal committee   |      | of its role and reporting structure; statement of whether it is  |     |
| 3  |                    |      | independent from the sponsor and competing interests; and        |     |
| 4  |                    |      | reference to where further details about its charter can be      |     |
| 5  |                    |      | found, if not in the protocol. Alternatively, an explanation of  |     |
| 6  |                    |      | why a DMC is not needed                                          |     |
| 7  |                    |      |                                                                  |     |
| 8  |                    |      |                                                                  |     |
| 9  |                    |      |                                                                  |     |
| 10 |                    |      |                                                                  |     |
| 11 | Data monitoring:   | #21b | Description of any interim analyses and stopping guidelines,     | n/a |
| 12 | interim analysis   |      | including who will have access to these interim results and      |     |
| 13 |                    |      | make the final decision to terminate the trial                   |     |
| 14 |                    |      |                                                                  |     |
| 15 |                    |      |                                                                  |     |
| 16 | Harms              | #22  | Plans for collecting, assessing, reporting, and managing         | 11  |
| 17 |                    |      | solicited and spontaneously reported adverse events and          |     |
| 18 |                    |      | other unintended effects of trial interventions or trial conduct |     |
| 19 |                    |      |                                                                  |     |
| 20 |                    |      |                                                                  |     |
| 21 | Auditing           | #23  | Frequency and procedures for auditing trial conduct, if any,     | 11  |
| 22 |                    |      | and whether the process will be independent from                 |     |
| 23 |                    |      | investigators and the sponsor                                    |     |
| 24 |                    |      |                                                                  |     |
| 25 |                    |      |                                                                  |     |
| 26 |                    |      |                                                                  |     |
| 27 | Research ethics    | #24  | Plans for seeking research ethics committee / institutional      | 12  |
| 28 | approval           |      | review board (REC / IRB) approval                                |     |
| 29 |                    |      |                                                                  |     |
| 30 |                    |      |                                                                  |     |
| 31 | Protocol           | #25  | Plans for communicating important protocol modifications         | 12  |
| 32 | amendments         |      | (eg, changes to eligibility criteria, outcomes, analyses) to     |     |
| 33 |                    |      | relevant parties (eg, investigators, REC / IRBs, trial           |     |
| 34 |                    |      | participants, trial registries, journals, regulators)            |     |
| 35 |                    |      |                                                                  |     |
| 36 |                    |      |                                                                  |     |
| 37 | Consent or assent  | #26a | Who will obtain informed consent or assent from potential        | 12  |
| 38 |                    |      | trial participants or authorised surrogates, and how (see        |     |
| 39 |                    |      | Item 32)                                                         |     |
| 40 |                    |      |                                                                  |     |
| 41 |                    |      |                                                                  |     |
| 42 |                    |      |                                                                  |     |
| 43 | Consent or assent: | #26b | Additional consent provisions for collection and use of          | 12  |
| 44 | ancillary studies  |      | participant data and biological specimens in ancillary           |     |
| 45 |                    |      | studies, if applicable                                           |     |
| 46 |                    |      |                                                                  |     |
| 47 |                    |      |                                                                  |     |
| 48 | Confidentiality    | #27  | How personal information about potential and enrolled            | 12  |
| 49 |                    |      | participants will be collected, shared, and maintained in        |     |
| 50 |                    |      | order to protect confidentiality before, during, and after the   |     |
| 51 |                    |      | trial                                                            |     |
| 52 |                    |      |                                                                  |     |
| 53 |                    |      |                                                                  |     |
| 54 |                    |      |                                                                  |     |
| 55 | Declaration of     | #28  | Financial and other competing interests for principal            | 2   |
| 56 | interests          |      | investigators for the overall trial and each study site          |     |
| 57 |                    |      |                                                                  |     |
| 58 |                    |      |                                                                  |     |
| 59 | Data access        | #29  | Statement of who will have access to the final trial dataset,    | 12  |
| 60 |                    |      |                                                                  |     |

|    |                       |                                                                                   |     |
|----|-----------------------|-----------------------------------------------------------------------------------|-----|
|    |                       | and disclosure of contractual agreements that limit such access for investigators |     |
| 1  |                       |                                                                                   |     |
| 2  |                       |                                                                                   |     |
| 3  |                       |                                                                                   |     |
| 4  | Ancillary and post    | #30 Provisions, if any, for ancillary and post-trial care, and for                | 12  |
| 5  | trial care            | compensation to those who suffer harm from trial                                  |     |
| 6  |                       | participation                                                                     |     |
| 7  |                       |                                                                                   |     |
| 8  |                       |                                                                                   |     |
| 9  | Dissemination policy: | #31a Plans for investigators and sponsor to communicate trial                     | 12  |
| 10 | trial results         | results to participants, healthcare professionals, the public,                    |     |
| 11 |                       | and other relevant groups (eg, via publication, reporting in                      |     |
| 12 |                       | results databases, or other data sharing arrangements),                           |     |
| 13 |                       | including any publication restrictions                                            |     |
| 14 |                       |                                                                                   |     |
| 15 |                       |                                                                                   |     |
| 16 |                       |                                                                                   |     |
| 17 | Dissemination policy: | #31b Authorship eligibility guidelines and any intended use of                    | 12  |
| 18 | authorship            | professional writers                                                              |     |
| 19 |                       |                                                                                   |     |
| 20 |                       |                                                                                   |     |
| 21 | Dissemination policy: | #31c Plans, if any, for granting public access to the full protocol,              | 12  |
| 22 | reproducible          | participant-level dataset, and statistical code                                   |     |
| 23 | research              |                                                                                   |     |
| 24 |                       |                                                                                   |     |
| 25 |                       |                                                                                   |     |
| 26 |                       |                                                                                   |     |
| 27 | Informed consent      | #32 Model consent form and other related documentation given                      | n/a |
| 28 | materials             | to participants and authorised surrogates                                         |     |
| 29 |                       |                                                                                   |     |
| 30 |                       |                                                                                   |     |
| 31 | Biological specimens  | #33 Plans for collection, laboratory evaluation, and storage of                   | n/a |
| 32 |                       | biological specimens for genetic or molecular analysis in the                     |     |
| 33 |                       | current trial and for future use in ancillary studies, if                         |     |
| 34 |                       | applicable                                                                        |     |
| 35 |                       |                                                                                   |     |
| 36 |                       |                                                                                   |     |

The SPIRIT checklist is distributed under the terms of the Creative Commons Attribution License CC-BY-ND 3.0. This checklist was completed on 06. July 2018 using <http://www.goodreports.org/>, a tool made by the [EQUATOR Network](#) in collaboration with [Penelope.ai](#)

# BMJ Open

## Application of electroacupuncture for postoperative pain management after total knee arthroplasty: a study protocol for a single-blinded, randomised placebo-controlled trial

|                                 |                                                                                                                                                                                                                                                                                                                                                                                                                                                                                                                                                                                                                                                                                                                                                                                                                                                 |
|---------------------------------|-------------------------------------------------------------------------------------------------------------------------------------------------------------------------------------------------------------------------------------------------------------------------------------------------------------------------------------------------------------------------------------------------------------------------------------------------------------------------------------------------------------------------------------------------------------------------------------------------------------------------------------------------------------------------------------------------------------------------------------------------------------------------------------------------------------------------------------------------|
| Journal:                        | <i>BMJ Open</i>                                                                                                                                                                                                                                                                                                                                                                                                                                                                                                                                                                                                                                                                                                                                                                                                                                 |
| Manuscript ID                   | bmjopen-2018-026084.R1                                                                                                                                                                                                                                                                                                                                                                                                                                                                                                                                                                                                                                                                                                                                                                                                                          |
| Article Type:                   | Protocol                                                                                                                                                                                                                                                                                                                                                                                                                                                                                                                                                                                                                                                                                                                                                                                                                                        |
| Date Submitted by the Author:   | 05-Dec-2018                                                                                                                                                                                                                                                                                                                                                                                                                                                                                                                                                                                                                                                                                                                                                                                                                                     |
| Complete List of Authors:       | Zhong, Sheng; Shanghai University of Traditional Chinese Medicine<br>Guanghua Hospital of Integrated Traditional Chinese Medicine and Western Medicine<br>Huang, Hai; Shanghai University of Traditional Chinese Medicine<br>Guanghua Hospital of Integrated Traditional Chinese Medicine and Western Medicine<br>Xie, Jun; Shanghai University of Traditional Chinese Medicine<br>Guanghua Hospital of Integrated Traditional Chinese Medicine and Western Medicine<br>Zhao, Ling; Shanghai University of Traditional Chinese Medicine<br>Song, Xiu-ling; Shanghai University of Traditional Chinese Medicine<br>Chen, Yue-lai; Shanghai University of Traditional Chinese Medicine<br>Xiao, Lian-bo; Shanghai University of Traditional Chinese Medicine<br>Guanghua Hospital of Integrated Traditional Chinese Medicine and Western Medicine |
| <b>Primary Subject Heading</b>: | Medical management                                                                                                                                                                                                                                                                                                                                                                                                                                                                                                                                                                                                                                                                                                                                                                                                                              |
| Secondary Subject Heading:      | Research methods                                                                                                                                                                                                                                                                                                                                                                                                                                                                                                                                                                                                                                                                                                                                                                                                                                |
| Keywords:                       | electroacupuncture, postoperative pain, total knee arthroplasty, the study protocol                                                                                                                                                                                                                                                                                                                                                                                                                                                                                                                                                                                                                                                                                                                                                             |
|                                 |                                                                                                                                                                                                                                                                                                                                                                                                                                                                                                                                                                                                                                                                                                                                                                                                                                                 |

SCHOLARONE™  
Manuscripts

1  
2  
3  
4 1 **Application of electroacupuncture for postoperative pain management after total**  
5  
6 2 **knee arthroplasty: a study protocol for a single-blinded, randomised**  
7  
8 3 **placebo-controlled trial**  
9  
10

11 4 Sheng Zhong, Hai Huang, Jun Xie, Ling Zhao, Xiu-ling Song, Yue-lai Chen, Lian-bo  
12  
13  
14 5 Xiao

16  
17 6 **Author Affiliations:**

18  
19 7 Sheng Zhong, MD, Guanghua Hospital, Shanghai University of Traditional Chinese  
20  
21  
22 8 Medicine, Shanghai, China, drcyan@foxmail.com

23  
24 9 Hai Huang, MD, Guanghua Hospital, Shanghai University of Traditional Chinese  
25  
26  
27 10 Medicine, Shanghai, China, haichuan880@163.com

28  
29  
30 11 Jun Xie, MD, Guanghua Hospital, Shanghai University of Traditional Chinese  
31  
32  
33 12 Medicine, Shanghai, China, leoxie199@126.com

34  
35 13 Ling Zhao, PhD, Shanghai University of Traditional Chinese Medicine, Shanghai,  
36  
37  
38 14 China, zhao099@hotmail.com

39  
40 15 Xiu-ling Song, MD, Shanghai University of Traditional Chinese Medicine, Shanghai,  
41  
42  
43 16 China, songxiuling2007@163.com

44  
45 17 Yue-lai Chen, PhD, Shanghai University of Traditional Chinese Medicine, Shanghai,  
46  
47  
48 18 China, chenyuelai@163.com

49  
50 19 Lian-bo Xiao, MD, Guanghua Hospital, Shanghai University of Traditional Chinese  
51  
52  
53 20 Medicine, Shanghai, China, 13701888178@163.com

54  
55  
56 21 **Corresponding Author:**

57  
58 22 Lian-bo Xiao, PhD, Guanghua Hospital, Shanghai University of Traditional Chinese  
59  
60

1  
2  
3  
4 23 Medicine, No. 540 Xinhua Road, Changning District, Shanghai (CN 200052), China,  
5  
6  
7

8  
9  
10  
11  
12  
13  
14  
15  
16  
17 24 13701888178@163.com, +8613701888178  
18

19  
20  
21  
22  
23  
24  
25  
26  
27  
28 25 Lian-bo Xiao and Yue-lai Chen contributed equally to this paper.  
29

### 30 31 32 33 34 35 36 37 38 39 40 41 42 43 44 45 46 47 48 49 50 51 52 53 54 55 56 57 58 59 60

## 27 **Author Contributions**

28 SZ and LBX conceived the study while HH, JX, LZ, XLS designed the study.

29 The study protocol was drafted by SZ and LBX, and was revised by YLC. All authors

30 approved the final manuscript of this study protocol.

31 **Word Count:**2190

## 32 **Funding**

33 This work will be supported by Project of Shanghai University of Traditional

34 Chinese Medicine Grant (Y201812).

## 35 **Conflicts of Interests**

36 The authors declared that there are no potential conflicts of interest with respect

37 to the research, authorship, and/or publication of this study.

1  
2  
3 **Abstract:**  
4

5 40 Introduction: The purpose of this study is to assess the efficacy of electroacupuncture  
6  
7  
8 41 to relieve pain and promote functional rehabilitation after total knee surgery.  
9

10 42 Methods and analysis: We propose a single-blinded, randomised placebo-controlled  
11  
12  
13 43 trial to evaluate the efficacy of electroacupuncture. Patients with osteoarthritis (aged  
14  
15  
16 44 55 to 80 years) undergoing unilateral total knee arthroplasty will be included in the  
17  
18 45 trial. They will be randomised to receive either electroacupuncture or  
19  
20  
21 46 sham-electroacupuncture. A total of 110 patients will receive electroacupuncture and  
22  
23 47 sham-electroacupuncture for three days after TKA. Postoperative pain will be  
24  
25  
26 48 measured using VAS score, and the need for an additional dose of opioid and  
27  
28  
29 49 analgesics will be recorded as the primary outcome. Secondary outcomes include  
30  
31 50 knee function and swelling, postoperative anxiety, postoperative nausea and vomiting  
32  
33  
34 51 among other complications.  
35

36 52 Ethics and dissemination: This study has been approved by the ethics committee, and  
37  
38  
39 53 subsequent modifications of the protocol will be reported and approved by it. Written  
40  
41  
42 54 inform content will be obtained from all of the participants or their authorized agents.  
43

44 55 Trial registration number: ChiCTR1800016200  
45

46 56 Keywords: electroacupuncture, postoperative pain, total knee arthroplasty, study  
47  
48  
49 57 protocol  
50

51  
52  
53  
54 **Article Summary**  
55

56  
57 60 *Strengths and limitations of this study*  
58

59  
60 61 1. The study is the first single-blinded, randomised placebo-controlled trial in China  
61



1  
2  
3  
4 62 to assess the efficacy of electroacupuncture to relieve pain and promote functional  
5  
6  
7 63 rehabilitation after total knee surgery.

8  
9 64 2. The study will use an efficient sham-electroacupuncture method that makes it hard  
10  
11  
12 65 for patients with electroacupuncture treatment experience to distinguish between both  
13  
14  
15 66 treatments.

16  
17 67 3. The study is rigorously designed, which includes adequate sample size, proper  
18  
19  
20 68 randomization and allocation concealment, and prospective trial registration to reduce  
21  
22  
23 69 selection and confounding bias.

24  
25 70 4. There is still bias in the implementation of blind method due to the unblinded  
26  
27  
28 71 acupuncturists.

29  
30 72

### 31 32 73 **Introduction**

33  
34  
35 74 Total knee arthroplasty (TKA) is the most frequently performed surgical  
36  
37  
38 75 procedure for end-stage osteoarthritis and rheumatoid arthritis. Moderate to severe  
39  
40  
41 76 postoperative pain is a major complaint in most patients. Acute and subacute  
42  
43  
44 77 postoperative pain is highly associated with persistent post-surgical pain (PPSP),  
45  
46  
47 78 especially when the acute pain is not treated with effective analgesia.<sup>1</sup> A recent study  
48  
49  
50 79 showed that 10%-34% and 7%-23% of patients reported severe pain after TKA and  
51  
52  
53 80 total hip arthroplasty (THA), respectively, which indicates that TKA patients are more  
54  
55  
56 81 likely to develop PPSP.<sup>2</sup> Multimodal analgesia has been used for 20 years and it is  
57  
58  
59 82 considered to be the most effective strategy for PPSP. Abuse of analgesic drugs has  
60  
61  
62 83 increased exposure of the public to the side effects of non-steroidal anti-inflammatory

1  
2  
3  
4 84 drugs (NSAIDs) and opioids.<sup>3,4</sup> Drug-free interventions to reduce pain or opioid  
5  
6 85 consumption are more consistent with the principles of Enhanced Recovery After  
7  
8  
9 86 Surgery (ERAS).

10  
11 Clinical trials and systematic reviews have shown that the efficacy of  
12  
13  
14 88 electroacupuncture or acupuncture analgesia is controversial.<sup>5-8</sup> Electrotherapy and  
15  
16  
17 89 acupuncture have been proved to be potentially beneficial for postoperative pain after  
18  
19  
20 90 TKA.<sup>9</sup> Studies on the mechanism of electroacupuncture analgesia indicated that it  
21  
22  
23 91 activates many bioactive chemicals through peripheral, spinal, and supraspinal  
24  
25  
26 92 mechanisms.<sup>10</sup> The supraspinal mechanisms showed EA analgesia is highly associated  
27  
28  
29 93 with descending pain regulation of the periaqueductal grey (PAG) and the rostral  
30  
31  
32 94 ventromedial medulla (RVM).<sup>10,11</sup> The PAG-RVM system is recognized as the central  
33  
34  
35 95 site of action of analgesic agents including opioids, cyclooxygenase inhibitors, and  
36  
37  
38 96 cannabinoids.<sup>12-14</sup> We hypothesize that EA may exert an analgesic effect by activating  
39  
40  
41 97 the PAG-RVM system. Besides, the placebo effect is highly associated with both  
42  
43  
44 98 areas of the brain.<sup>15,16</sup> Strict blinding is required to rule out the effects of the placebo  
45  
46  
47 99 effect on outcomes.

48  
49  
50  
51 100 The purpose of this study is to assess the efficacy of electroacupuncture on pain  
52  
53  
54 101 relief and promoting functional rehabilitation after total knee surgery. We will use a  
55  
56  
57 102 large sample size and a reliable blind method of electroacupuncture to ensure a  
58  
59  
60 103 credible conclusion.

## 104 105 **Methods and analysis**

1  
2  
3  
4 106 *Study Context*  
5

6 107 This study will be a single-blinded, randomised placebo-controlled trial  
7  
8  
9 108 performed at the inpatient ward of Shanghai University of Traditional Chinese  
10  
11  
12 109 Medicine Guanghua Hospital, Shanghai, China. The annual surgical number of total  
13  
14 110 knee arthroplasty for osteoarthritis was about 600 in 2017. We planned to begin  
15  
16  
17 111 recruiting patients from June 2018 and patients preparing for unilateral TKA will be  
18  
19  
20 112 recruited. In this study, there will be 7 investigators, including a chief orthopaedic  
21  
22 113 surgeon (LBX) with 20 years of clinical experience, two orthopaedic physicians (JX  
23  
24 114 and SZ), two Chinese medicine acupuncturists (HH and YLC), and two outcome  
25  
26  
27 115 assessors (LZ, and XLS). ERAS programme (Table 1) will be performed by trained  
28  
29  
30 116 nurses and physiotherapists at the inpatient ward. The ERAS programme is routinely  
31  
32  
33 117 applied, but electroacupuncture has been added to analgesia. The schedule and the  
34  
35 118 study flow diagram is shown in Table 2 and Figure 1.  
36

37  
38 119 *Sample size calculation*  
39

40 120 In a previous meta-analysis study in which pain relief was compared between EA  
41  
42  
43 121 groups and controls, the minimal mean difference of the two groups based on the  
44  
45 122 VAS score (on a scale of 0-10) was -1.14 (95% CI, -1.90 to -0.38), and the standard  
46  
47  
48 123 deviation was estimated to be 2.<sup>9</sup> Considering a dropout rate of 10%, 110 patients  
49  
50  
51 124 are required to yield a power of 80% with a significance level of 0.05.<sup>17</sup>  
52

53 125 *Randomisation and allocation concealment*  
54

55  
56 126 One hundred and ten patients will be divided into EA and Sham-EA groups with  
57  
58  
59 127 a ratio of 1:1. An independent biostatistician will generate a random sequence using  
60

1  
2  
3  
4 128 the R (version 3.4.4). A sequence of numbers will be prepared and sealed in an  
5  
6  
7 129 opaque envelope. Only the acupuncturist will be allowed to open the envelope to  
8  
9 130 obtain the grouping code.

### 11 131 *Single-blinding*

12  
13  
14 132 The acupuncturist will be blinded to the grouping information in advance, and the  
15  
16  
17 133 treatment method according to the grouping information contained in envelopes. All  
18  
19  
20 134 participants, orthopaedic surgeons, and relevant healthcare staff will be blinded to the  
21  
22  
23 135 study. The outcome assessor will not be aware of the treatment that patients received  
24  
25  
26 136 and will only instruct the patient to fill in the scales. The independent biostatistician  
27  
28  
29 137 will also be blinded when performing the statistical analyses. To maximize the  
30  
31  
32 138 blinding of patients, an effective sham electroacupuncture method will be applied  
33  
34  
35 139 with adhesive pads, a dull-tipped placebo needle, and a sham electrical stimulation  
36  
37  
38 140 device. Details of the sham operation design are described in the following part.

### 39 141 *Eligibility criteria*

#### 40 142 *Eligible*

41  
42  
43 143 (1) Aged 55 to 80 years; (2) Meet the 1995 American College of Rheumatology  
44  
45  
46 144 (ACR) diagnostic criteria for osteoarthritis; (3) Undergoing unilateral total knee  
47  
48  
49 145 arthroplasty under general anaesthesia without surgical contraindications; (4)  
50  
51  
52 146 American Society of Anesthesiologists (ASA) Grade I or II.

#### 53 147 *Ineligible*

54  
55  
56 148 (1) The area of acupuncture points has skin damage and cannot perform  
57  
58  
59 149 acupuncture; (2) Preoperative deep venous thrombosis or swelling of the lower  
60

1  
2  
3  
4 150 extremities; (3) Severe arrhythmia, heart failure, chronic obstructive pulmonary  
5  
6  
7 151 disease, epilepsy, mental disease; (4) Received treatment of acupuncture in past 1  
8  
9 152 month.

10  
11  
12 153 *Study interventions*

13  
14 154 *EA group*

15  
16  
17 155 Patients will receive early acupuncture analgesia once a day from 24 to 72 hours  
18  
19 156 after surgery. The first session of acupuncture treatment will be performed at 24 hours  
20  
21 157 postoperatively. Firstly, the adhesive pads will be put on the acupoints of bilateral  
22  
23 158 *Futu* (Stomach 32, ST32), *Zusanli* (Stomach 36, ST36), *Yanglingquan* (Gall Bladder  
24  
25 159 34, GB34), and *Yinlingquan* (Spleen 9, SP9). 1.5 *cun* acupuncture needles  
26  
27 160 (0.25×40mm, Huatuo Inc.) will be manually inserted into the skin through the  
28  
29 161 adhesive pads (Figure. 2). When *De-qi* sensation is achieved, subsequent electrical  
30  
31 162 stimulation with a frequency of 2Hz, a continuous wave and tolerable intensity by the  
32  
33 163 patient will be applied to the four acupoints (GB 34 to ST32 and ST36 to SP9) using a  
34  
35 164 Hwato SDZ-V electrical stimulation device (Suzhou Medical Appliance Factory,  
36  
37 165 Suzhou, China). Needles with electrical stimulation will be retained for 20 minutes in  
38  
39 166 each session. The patients will receive a total of 3 treatments which were given once a  
40  
41 167 day.

42  
43  
44 168 *Sham-EA group*

45  
46  
47 169 Similar to the EA group, three sessions of acupuncture will be provided at the  
48  
49 170 same time. An adhesive pad will be put on the sham-acupoint which is 20 mm distal  
50  
51 171 to the real acupoint (Figure. 3). The placebo needle has a blunt-tip and it will be  
52  
53  
54  
55  
56  
57  
58  
59  
60

1  
2  
3  
4 172 manually inserted into the adhesive pads but without skin penetration to provide  
5  
6 173 participant-blinding effects (Figure. 2). The sham electrical stimulation device will  
7  
8  
9 174 have a connecting cord with a broken inner wire with no actual current output.  
10  
11  
12 175 Needles will also be retained for 20 minutes in each session. The patients will receive  
13  
14 176 a total of 3 sham treatments which were given once a day. This Sham-EA method was  
15  
16  
17 177 proved to be effective in a previous study.<sup>18</sup>

### 178 *Postoperative analgesia*

179 All patients will receive the same analgesic procedure. Fentanyl  
180 patient-controlled analgesia (PCA) will be used at a continuous infusion rate of 0.25  
181  $\mu\text{g}/(\text{kg}\cdot\text{h})$  and a bolus of 0.15  $\mu\text{g}/\text{kg}$  with a 10-minute lockout time. Patients will be  
182 allowed to use Celebrex 200 mg per day. Besides, additional rescue doses of  
183 analgesics will be provided upon demand for patients with a VAS score above 60.

### 184 *Discontinuing criteria*

185 (1) Acupuncture cannot be tolerated after surgery or patients that cannot be  
186 implemented according to the protocol; (2) Severe physiological and pathological  
187 changes were found during surgery and it is not appropriate to receive acupuncture  
188 treatment, such as anaesthesia accidents, cardiac-cerebrovascular accidents, nerve or  
189 vascular injury during surgery; (3) Patients in which the trial arrangement cannot be  
190 completed or the safety judgment is affected due to surgical factors after the test; (4)  
191 Severe adverse reactions, severe complications, such as deep vein thrombosis,  
192 pulmonary embolism and severe allergic reactions.

193

1  
2  
3  
4 194 *Outcome*

5  
6 195 *Primary outcome*

7  
8  
9 196 *Pain*

10  
11 197 When the patients are discharged from the operating room, this will be recorded  
12  
13  
14 198 as 0 hours. Patients will put a mark on a 100 mm visual analogue scale to assess the  
15  
16  
17 199 pain of their knee (from no pain to very severe) at 6, 24, 48, and 72 hours after  
18  
19  
20 200 surgery, then assessors record it. Additional PCA dose requirement will be evaluated  
21  
22 201 in this study to reflect the degree of pain. Patients will be trained to adjust the PCA to  
23  
24 202 obtain an additional dose of analgesia depending on the degree of pain. This will be  
25  
26  
27 203 recorded 48 hours after surgery. Patients will be given an additional dose of analgesia  
28  
29  
30 204 upon demand if the VAS score is above 60. The additional use of analgesics within 2  
31  
32  
33 205 weeks after surgery will be recorded in the case report forms.

34  
35 206 *Secondary outcome*

36  
37 207 *Knee function and swelling*

38  
39  
40 208 Knee function will be measured based on Hospital for Special Surgery  
41  
42 209 Knee-Rating Scale <sup>19</sup> (HSS scale) (Supplemental file) at one day before surgery and  
43  
44  
45 210 three days after surgery. All patients will first be educated about the HSS scale by a  
46  
47  
48 211 trained researcher until they fully understand the questionnaire, then asked to  
49  
50  
51 212 complete the form according to their actual conditions. At 24 hours after surgery, the  
52  
53  
54 213 outcome assessor will remove the elastic bandage and measure the circumference of  
55  
56  
57 214 the knee at the superior patellar pole. A second measurement will be performed 72  
58  
59  
60 215 hours after surgery.

1  
2  
3  
4 216 *Perioperative anxiety*

5  
6 217 Perioperative anxiety will be measured by the Hamilton Anxiety Scale  
7  
8  
9 218 (HAMA)<sup>20</sup> (Supplemental file) at one day before surgery and three days after surgery.  
10  
11  
12 219 HAMA has 14 levels to assess the severity of a patient's anxiety, and it divides  
13  
14 220 anxiety into physical (7~13) and spiritual (1~6 and 14).

15  
16  
17 221 *Postoperative nausea and vomiting (PONV)*

18  
19 222 PONV will be measured according to vomiting symptoms scores in 4-time points,  
20  
21  
22 223 including on the day of surgery and 1, 2, 3 days after surgery.<sup>21</sup> Functional Living  
23  
24 224 Index-Emesis (FLIE)<sup>22</sup> (Supplemental file) is used to evaluate the effect of PONV on  
25  
26  
27 225 the quality of life, and it will be measured 3 days after surgery.

28  
29  
30 226 *Postoperative complications and adverse events*

31  
32 227 All expected and unexpected adverse events will be measured during the  
33  
34  
35 228 allocated intervention process and during the entire study period. Acupuncture-related  
36  
37  
38 229 adverse events are hematoma and syncope during acupuncture. Other postoperative  
39  
40  
41 230 complications including incision infection, urinary retention, deep vein thrombosis,  
42  
43 231 and postoperative persistent pain will be recorded 6 weeks after surgery. All serious  
44  
45  
46 232 adverse events (SAEs) will be reported immediately to the sponsor to allow further  
47  
48  
49 233 investigations into their causes.

50  
51 234 *Data management*

52  
53 235 Data entry will be conducted by two independent trained research assistants using  
54  
55  
56 236 paper CRFs to record the research data after completion of final data collection. As  
57  
58  
59 237 acupuncture has known minimal risks, a formal data monitoring committee will not  
60



1  
2  
3  
4 238 be required.<sup>8,23</sup> Independent investigators of the hospital staff will monitor and audit  
5  
6 239 the data periodically.  
7

#### 8 9 240 *Statistical analysis*

10  
11 241 According to the intention to treat (ITT) principle, full analysis set (FAS) and  
12  
13 242 per-protocol set (PPS) will be used for primary analysis. Safety set (SS) will not be  
14  
15 243 required since acupuncture has minimal risks.<sup>8,23</sup> Sensitivity analysis will be  
16  
17 244 performed to determine the impact of incomplete records on results. Missing data will  
18  
19 245 not be imputed. Statistical analysis will be performed using R (version 3.4.4). The  
20  
21 246 difference between the two groups will be calculated and compared using the t-test if  
22  
23 247 the Shapiro-Wilk test showed that the data is normally distributed, otherwise the  
24  
25 248 Mann-Whitney U test will be used. A Pearson  $\chi^2$  or Fisher's exact test will be used to  
26  
27 249 calculate the differences in the count data. Mixed effects models will be used to  
28  
29 250 analyze the trend of changes in VAS scores with two factors of groups and time.<sup>24</sup>  
30  
31  
32  
33  
34  
35  
36

#### 37 251 *Ethics and dissemination*

38  
39  
40 252 This study has been approved by the ethics committee of Shanghai Guanghua  
41  
42 253 Hospital of Integrated Chinese and Western Medicine (approval number AF13v2-2),  
43  
44 254 and any modification of the protocol will be reported and approved by it. Written  
45  
46 255 informed consent will be obtained from all participants or their authorized agents. All  
47  
48 256 electroacupuncture treatments will be free and the research data will be strictly  
49  
50 257 confidential. The result of the trial will be presented on the website of the Chinese  
51  
52 258 Clinical Trial Registry and published in peer-reviewed journals.  
53  
54  
55  
56  
57

#### 58 259 *Patient and Public Involvement*

1  
2  
3  
4  
5  
6  
7  
8  
9  
10  
11  
12  
13  
14  
15  
16  
17  
18  
19  
20  
21  
22  
23  
24  
25  
26  
27  
28  
29  
30  
31  
32  
33  
34  
35  
36  
37  
38  
39  
40  
41  
42  
43  
44  
45  
46  
47  
48  
49  
50  
51  
52  
53  
54  
55  
56  
57  
58  
59  
60

260 Patient and public were not involved in the design of this study. The participants  
261 will be informed of the result of this study during the follow-up visit. Besides, we will  
262 enlist their help in disseminating the research findings.

## 263 Discussion

264 Drug-free interventions, especially EA, have been proven effective in pain relief  
265 and promoting functional rehabilitation,<sup>25,26</sup> and they will have good prospects for  
266 relieving opioid abuse or overuse of NSAIDs. However, the effect and mechanism of  
267 acupuncture analgesia are not clear, and the placebo effect is considered to play an  
268 important role.<sup>8</sup> This study has enough samples to obtain reliable results and we have  
269 improved the implementation of blinding to reduce the placebo effect. We hope that  
270 the results of the study will provide new evidence for electroacupuncture treatment of  
271 postoperative pain in TKA. Another question is to determine if the statistical  
272 difference between the two groups is clinically conscious. The minimal clinically  
273 important difference (MCID) is a measure that is used to evaluate the clinical  
274 significance of an intervention. In the case of standardized multimodal analgesia, the  
275 MCID for VAS of postoperative pain after TKA is -22.6 (on a scale of 0-100), and the  
276 MCID can be also used to evaluate the difference of EA and sham.<sup>27</sup>

277 Multiple evidence-based ERAS strategies for TKA have been shown to reduce  
278 postoperative complications and improve prognosis and patient satisfaction.  
279 Postoperative analgesia is an important part of ERAS. This study is based on add-on  
280 design, electroacupuncture and sham are applied to two groups of patients who used  
281 standard multimodal analgesia to evaluate the benefits of electroacupuncture on

1  
2  
3  
4 282 postoperative pain in TKA. We recommend EA and more non-drug therapies as a  
5  
6 283 routine treatment in ERAS programme of TKA if results of the study prove that it  
7  
8  
9 284 really works.  
10

11 285

12  
13  
14 286 **Reference**

- 15  
16  
17 287 1 Veal FC, Bereznicki LRE, Thompson AJ, *et al.* Subacute Pain as a Predictor of  
18  
19 288 Long-Term Pain Following Orthopedic Surgery: An Australian Prospective 12  
20  
21 289 Month Observational Cohort Study. *Medicine (Baltimore)* 2015;**94**:e1498.  
22  
23  
24 290 doi:10.1097/MD.0000000000001498  
25  
26  
27 291 2 Beswick AD, Wylde V, Gooberman-Hill R, *et al.* What proportion of patients  
28  
29 292 report long-term pain after total hip or knee replacement for osteoarthritis? A  
30  
31 293 systematic review of prospective studies in unselected patients. *BMJ Open*  
32  
33 294 2012;**2**:e000435. doi:10.1136/bmjopen-2011-000435  
34  
35  
36 295 3 Han C, Li X, Jiang H, *et al.* The use of gabapentin in the management of  
37  
38 296 postoperative pain after total knee arthroplasty. *Medicine (Baltimore)*  
39  
40 297 2016;**95**:e3883. doi:10.1097/MD.0000000000003883  
41  
42  
43 298 4 Katz J, Buis T, Cohen L. Locked out and still knocking: predictors of excessive  
44  
45 299 demands for postoperative intravenous patient-controlled analgesia. *Can J*  
46  
47 300 *Anesth Can d'anesthésie* 2008;**55**:88–99. doi:10.1007/BF03016320  
48  
49  
50  
51 301 5 Li X, Wang R, Xing X, *et al.* Acupuncture for Myofascial Pain Syndrome: A  
52  
53 302 Network Meta-Analysis of 33 Randomized Controlled Trials. *Pain Physician*  
54  
55 303 2017;**20**:E883–902.  
56  
57  
58  
59  
60

1  
2  
3  
4  
5  
6  
7  
8  
9  
10  
11  
12  
13  
14  
15  
16  
17  
18  
19  
20  
21  
22  
23  
24  
25  
26  
27  
28  
29  
30  
31  
32  
33  
34  
35  
36  
37  
38  
39  
40  
41  
42  
43  
44  
45  
46  
47  
48  
49  
50  
51  
52  
53  
54  
55  
56  
57  
58  
59  
60

- 304 6 Peng L, Zhang C, Zhou L, *et al.* Traditional manual acupuncture combined  
305 with rehabilitation therapy for shoulder hand syndrome after stroke within the  
306 Chinese healthcare system: a systematic review and meta-analysis. *Clin*  
307 *Rehabil* 2018;**32**:429–39. doi:10.1177/0269215517729528
- 308 7 Ju ZY, Wang K, Cui HS, *et al.* Acupuncture for neuropathic pain in adults.  
309 *Cochrane Database Syst Rev* Published Online First: 2 December 2017.  
310 doi:10.1002/14651858.CD012057.pub2
- 311 8 Manheimer E, Cheng K, Linde K, *et al.* Acupuncture for peripheral joint  
312 osteoarthritis. *Cochrane Database Syst Rev* Published Online First: 20 January  
313 2010. doi:10.1002/14651858.CD001977.pub2
- 314 9 Tedesco D, Gori D, Desai KR, *et al.* Drug-Free Interventions to Reduce Pain or  
315 Opioid Consumption After Total Knee Arthroplasty. *JAMA Surg*  
316 2017;**152**:e172872. doi:10.1001/jamasurg.2017.2872
- 317 10 Zhang R, Lao L, Ren K, *et al.* Mechanisms of acupuncture-electroacupuncture  
318 on persistent pain. 2014. doi:10.1097/ALN.000000000000101
- 319 11 Zhao Z-Q. Neural mechanism underlying acupuncture analgesia. *Prog*  
320 *Neurobiol* 2008;**85**:355–75. doi:10.1016/j.pneurobio.2008.05.004
- 321 12 Pogatzki-zahn EM, Segelcke D, Schug SA. Postoperative pain — from  
322 mechanisms to treatment. *PAIN Reports* 2017;**2**:e588.  
323 doi:10.1097/PR9.0000000000000588
- 324 13 Heinricher MM, Tavares I, Leith JL, *et al.* Descending control of nociception:  
325 Specificity, recruitment and plasticity. *Brain Res Rev* 2009;**60**:214–25.

- 1  
2  
3  
4 326 doi:10.1016/j.brainresrev.2008.12.009  
5  
6 327 14 Leith JL, Wilson AW, Donaldson LF, *et al.* Cyclooxygenase-1-derived  
7  
8  
9 328 prostaglandins in the periaqueductal gray differentially control C- versus  
10  
11 329 A-fiber-evoked spinal nociception. *J Neurosci* 2007;**27**:11296–305.  
12  
13  
14 330 doi:10.1523/JNEUROSCI.2586-07.2007  
15  
16  
17 331 15 Tinnermann A, Geuter S, Sprenger C, *et al.* Interactions between brain and  
18  
19  
20 332 spinal cord mediate value effects in placebo hyperalgesia. *Science*  
21  
22 333 2017;**358**:105–8. doi:10.1126/science.aan1221  
23  
24  
25 334 16 Grahl A, Onat S, Büchel C. The periaqueductal gray and Bayesian integration  
26  
27 335 in placebo analgesia. *Elife* 2018;**7**. doi:10.7554/eLife.32930  
28  
29  
30 336 17 Chow SC, Wang H, Shao J. *Sample Size Calculations in Clinical Research,*  
31  
32 337 *Second Edition.* Taylor & Francis 2007.  
33  
34  
35 338 18 Liu Z, Liu Y, Xu H, *et al.* Effect of Electroacupuncture on Urinary Leakage  
36  
37 339 Among Women With Stress Urinary Incontinence. *Jama* 2017;**317**:2493.  
38  
39  
40 340 doi:10.1001/jama.2017.7220  
41  
42  
43 341 19 Bach CM, Nogler M, Steingruber IE, *et al.* Scoring Systems in Total Knee  
44  
45 342 Arthroplasty. 2002;:184–96.  
46  
47  
48 343 20 HAMILTON M. The assessment of anxiety states by rating. *Br J Med Psychol*  
49  
50 344 1959;**32**:50–5. doi:10.1145/363332.363339  
51  
52  
53 345 21 Hesketh PJ, Kris MG, Grunberg SM, *et al.* Proposal for classifying the acute  
54  
55 346 emetogenicity of cancer chemotherapy. *J Clin Oncol* 1997;**15**:103–9.  
56  
57  
58 347 doi:10.1200/JCO.1997.15.1.103  
59  
60

- 1  
2  
3  
4 348 22 Lindley CM, Hirsch JD, O'Neill C V., *et al.* Quality of life consequences of  
5  
6 349 emesis. *Qual Life Res* 1992;**1**:331–40.  
7  
8  
9 350 23 Witt CM, Pach D, Brinkhaus B, *et al.* Safety of Acupuncture: Results of a  
10  
11 351 Prospective Observational Study with 229,230 Patients and Introduction of a  
12  
13 352 Medical Information and Consent Form. *Complement Med Res* 2009;**16**:91–7.  
14  
15 353 doi:10.1159/000209315  
16  
17  
18  
19 354 24 Detry M, Ma Y. Analyzing repeated measurements using mixed models. *Jama*  
20  
21 355 2016;**315**:407–8. doi:10.1001/jama.2015  
22  
23  
24 356 25 Chen G, Gu R-X, Xu D-D. [The application of electroacupuncture to  
25  
26 357 postoperative rehabilitation of total knee replacement]. *Zhongguo Zhen Jiu*  
27  
28 358 2012;**32**:309–12.  
29  
30  
31  
32 359 26 Yue C, Zhang X, Zhu Y, *et al.* Systematic Review of Three Electrical  
33  
34 360 Stimulation Techniques for Rehabilitation After Total Knee Arthroplasty. *J*  
35  
36 361 *Arthroplasty* 2018;**33**:2330–7. doi:10.1016/j.arth.2018.01.070  
37  
38  
39  
40 362 27 Danoff JR, Goel R, Sutton R, *et al.* How Much Pain Is Significant? Defining  
41  
42 363 the Minimal Clinically Important Difference for the Visual Analog Scale for  
43  
44 364 Pain After Total Joint Arthroplasty. *J Arthroplasty* 2018;**33**:S71–S75.e2.  
45  
46 365 doi:10.1016/j.arth.2018.02.029  
47  
48  
49  
50  
51 366

Table 1. Enhanced Recovery After Surgery Programme

---

Preoperative

---

- 1 Preoperative education
  - 2 Carbohydrate loading preoperatively and avoidance of prolonged starving
  - 3 Use of preoperative probiotics
  - 4 No mechanical bowel preparation
  - 5 No premedication
  - 6 Preemptive analgesia
- 

Intraoperative

---

- 7 Maintenance of normothermia
  - 8 Goal-directed perioperative fluid administration
  - 9 Minimally invasive incision
  - 10 Avoidance of nasogastric tubes and deep vein catheterization
  - 11 Avoidance of bladder catheter, if necessary early removal of bladder catheter
  - 12 Use of tranexamic acid
  - 13 Periarticular local injection analgesia
- 

Postoperative

---

- 14 Multimodal analgesia: PCA analgesia, NSAIDs; Avoidance of opioid analgesia
  - 15 Use of postoperative antiemetic and laxatives
  - 16 Enforced early mobilisation
  - 17 Enforced early postoperative oral feeding
- 

PCA, patient controlled analgesia; NSAIDs, non-steroidal antiinflammatory drugs

370

Table 2. The schedule of trial enrolment, interventions and assessments

|                                                | Enrolment |         | Intervention period |          |          |
|------------------------------------------------|-----------|---------|---------------------|----------|----------|
|                                                | Pre-OP    | 6 hours | 24 hours            | 48 hours | 72 hours |
| <b>Enrolment</b>                               |           |         |                     |          |          |
| Informed consent                               | •         |         |                     |          |          |
| Assessment of eligibility                      | •         |         |                     |          |          |
| Randomisation                                  | •         |         |                     |          |          |
| <b>Interventions</b>                           |           |         |                     |          |          |
| EA                                             |           | •       | •                   | •        | •        |
| Sham-EA                                        |           | •       | •                   | •        | •        |
| <b>Assessments</b>                             |           |         |                     |          |          |
| VAS                                            | •         | •       | •                   | •        | •        |
| Additional dose released by PCA                |           |         |                     | •        |          |
| HSS scale                                      | •         |         |                     |          | •        |
| HAMA score                                     | •         |         |                     |          | •        |
| PONV                                           |           | •       | •                   | •        | •        |
| COK                                            |           |         | •                   |          | •        |
| Additional use of analgesics                   | •         |         |                     |          | •        |
| Postoperative complications and adverse events |           | •       | •                   | •        | •        |

OP, operation; EA, electroacupuncture; VAS, Visual Analogue Score; PCA, patient-controlled analgesia; HSS, hospital for special surgery; HAMA, Hamilton Anxiety Scale; PONV, post-operative nausea and vomiting; COK, circumference of knee

371



1  
2  
3  
4 **373 Figure Legend**

5  
6 374 Figure 1. The study flow diagram, including participants recruitment, eligibility,  
7  
8  
9 375 screening, randomization, allocation concealment, and outcome assessments. EA,  
10  
11  
12 376 electroacupuncture.

13  
14 377 Figure 2. The difference between the acupuncture needle and placebo. (A) The  
15  
16  
17 378 placebo needle (left) to be inserted into the adhesive pads and the tip can irritate the  
18  
19  
20 379 skin. The acupuncture needle (right) to be inserted into the skin through the adhesive  
21  
22  
23 380 pads. (B) The tip of the placebo needle (left) is blunt.

24  
25 381 Figure 3. Location of acupoints for the electroacupuncture and sham  
26  
27  
28 382 electroacupuncture groups. ST32, Stomach 32; GB4, Gall Bladder 34; ST36, Stomach  
29  
30 383 36; SP9, Spleen 9.

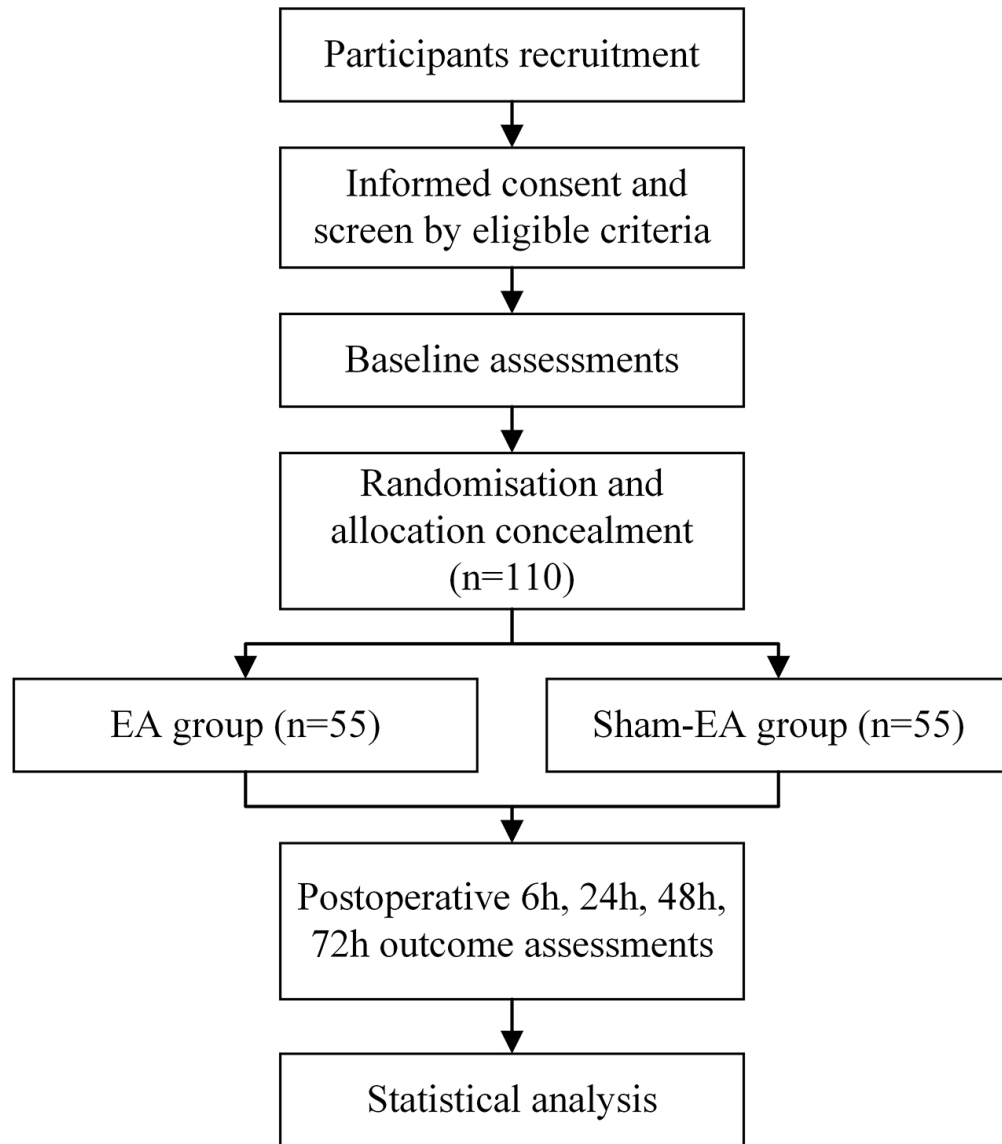

43 Figure 1. Study flow diagram, including participants recruitment, eligibility, screening, randomization,  
44 allocation concealment, and outcome assessments. EA, electroacupuncture.

45 107x122mm (300 x 300 DPI)

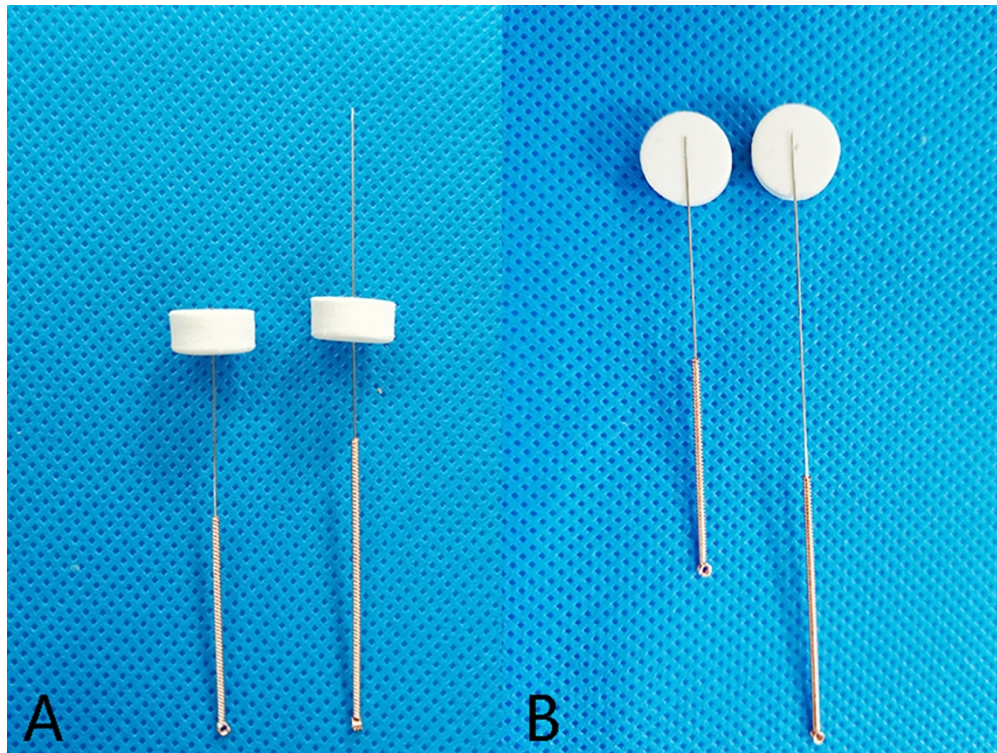

Figure 2. The difference between acupuncture needle and placebo. (A) The placebo needle (left) to be inserted into the adhesive pads and the tip can irritate the skin. The acupuncture needle (right) to be inserted into the skin through the adhesive pads. (B) The tip of the placebo needle (left) is blunt.

119x90mm (300 x 300 DPI)

1  
2  
3  
4  
5  
6  
7  
8  
9  
10  
11  
12  
13  
14  
15  
16  
17  
18  
19  
20  
21  
22  
23  
24  
25  
26  
27  
28  
29  
30  
31  
32  
33  
34  
35  
36  
37  
38  
39  
40  
41  
42  
43  
44  
45  
46  
47  
48  
49  
50  
51  
52  
53  
54  
55  
56  
57  
58  
59  
60

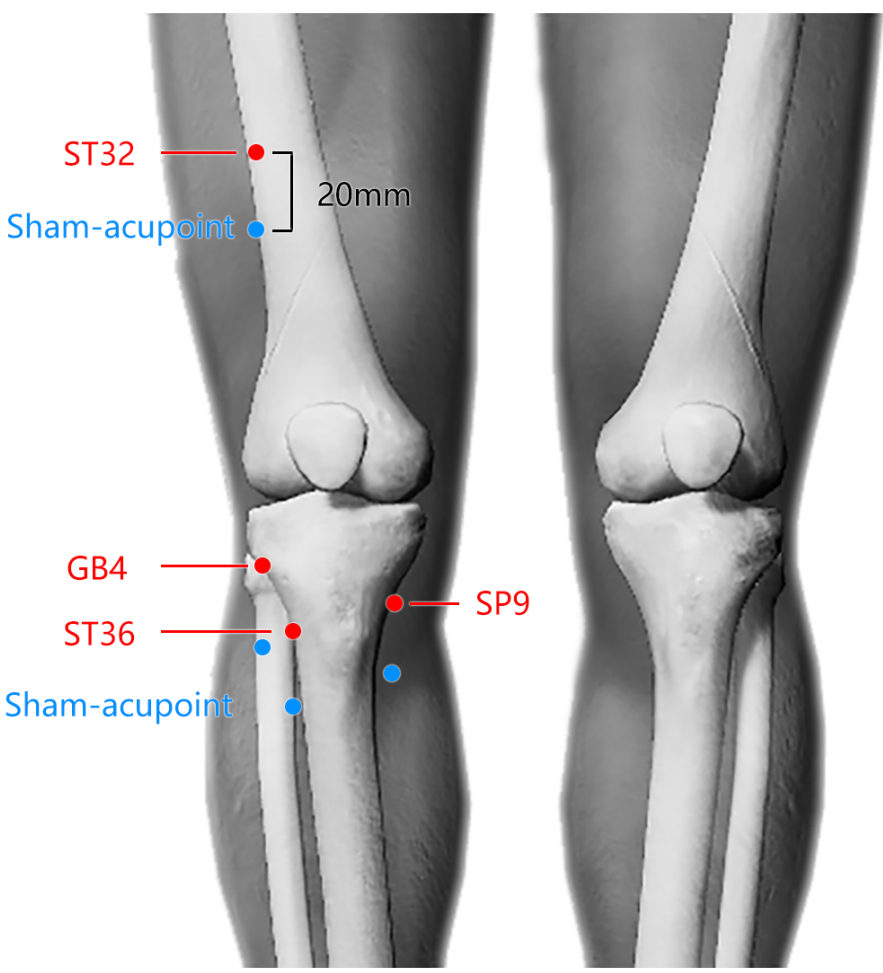

Figure 3. Location of acupoints for the electroacupuncture and sham electroacupuncture groups. ST32, Stomach 32; GB4, Gall Bladder 34; ST36, Stomach 36; SP9, Spleen 9.

94x90mm (300 x 300 DPI)

## Supplemental file

### 1. Hospital for Special Surgery Knee-Rating Scale<sup>1</sup>

#### **Hospital for Special Surgery Knee-Rating Scale (HSS)**

| <b>Criteria</b>                                                             | <b>Points</b> |
|-----------------------------------------------------------------------------|---------------|
| <b>Pain (30 points)</b>                                                     |               |
| No pain at any time                                                         | 30            |
| No pain on walking                                                          | 15            |
| Mild pain on walking                                                        | 10            |
| Moderate pain on waling                                                     | 5             |
| Severe pain on walking                                                      | 0             |
| No pain at rest                                                             | 15            |
| Mild pain at rest                                                           | 10            |
| Moderate pain at rest                                                       | 5             |
| Severe pain at rest                                                         | 0             |
| <b>Function (22 points)</b>                                                 |               |
| Walking and standing unlimited                                              | 12            |
| Walking distance of 5-10 blocks and standing ability<br>intermittent >1/2hr | 10            |
| Walking 1-5 blocks and standing up < 1/2hr                                  | 8             |
| Walking less than 1 block                                                   | 4             |
| Cannot walk                                                                 | 0             |
| Climbing stairs                                                             | 5             |
| Climbing stairs with support                                                | 2             |
| Transfer activity                                                           | 5             |
| Transfer activity with support                                              | 2             |
| <b>Range of Motion (18 points)</b>                                          |               |
| 1 point for each 8 degrees (max 18 points)                                  | 18            |
| <b>Muscle Strength (10 points)</b>                                          |               |
| Excellent: cannot break quadriceps power                                    | 10            |
| Good: can break the quadriceps power                                        | 8             |
| Fair: move through the arc of motion                                        | 4             |
| Poor: cannot move through arc of motion                                     | 0             |
| <b>Flexion Deformity (10 points)</b>                                        |               |
| No deformity                                                                | 10            |
| Less than 5 degrees                                                         | 8             |
| 5-10 degrees                                                                | 5             |
| > 10 degrees                                                                | 0             |
| <b>Instability (10 points)</b>                                              |               |
| None                                                                        | 10            |

|    |                             |    |
|----|-----------------------------|----|
| 1  |                             |    |
| 2  |                             |    |
| 3  | Mild: 0-5 degrees           | 8  |
| 4  | Moderate: 5-15 degrees      | 5  |
| 5  | Severe: > 15degrees         | 0  |
| 6  |                             |    |
| 7  | Subtraction                 |    |
| 8  | One cane                    | -1 |
| 9  | One crutch                  | -2 |
| 10 | Two crutches                | -3 |
| 11 | Extension lag of 5 degrees  | -2 |
| 12 | Extension lag of 10 degrees | -3 |
| 13 | Extension lag of 15 degrees | -5 |
| 14 | Each 5 degrees of varus     | -1 |
| 15 | Each 5 degrees of valgus    | -1 |
| 16 |                             |    |
| 17 |                             |    |
| 18 |                             |    |
| 19 |                             |    |

20 Excellent  $\geq 85$

21 Good = 70-84

22 Fair = 60-69

23 Poor  $\leq 60$

## 26 2. Hamilton Anxiety Rating Scale (HAMA)<sup>2</sup>

### 30 **Hamilton Anxiety Rating Scale (HAMA)**

31 Below is a list of phrases that describe certain feeling that people have. Rate the  
 32 patients by finding the answer which best describes the extent to which he/she has these  
 33 conditions. Select one of the five responses for each of the fourteen questions.  
 34  
 35

36 0 = Not present, 1 = Mild, 2 = Moderate, 3 = Severe, 4 = Very severe.

#### 39 **1 Anxious mood**

40 Worries, anticipation of the worst, fearful anticipation,  
 41 irritability.

42  0  1  2  3  4

#### 43 **2 Tension**

44 Feelings of tension, fatigability, startle response, moved to  
 45 tears easily, trembling, feelings of restlessness, inability to  
 46 relax.

47  0  1  2  3  4

#### 48 **3 Fears**

49 Of dark, of strangers, of being left alone, of animals, of  
 50 traffic, of crowds.

51  0  1  2  3  4

#### 52 **4 Insomnia**

53 Difficulty in falling asleep, broken sleep, unsatisfying sleep  
 54 and fatigue on waking, dreams, nightmares, night terrors

55  0  1  2  3  4

#### 56 **5 Intellectual**

57 Difficulty in concentration, poor memory.

58  0  1  2  3  4

**6 Depressed mood**

Loss of interest, lack of pleasure in hobbies, depression, early waking, diurnal swing.

0  1  2  3  4

**7 Somatic (muscular)**

Pains and aches, twitching, stiffness, myoclonic jerks, grinding of teeth, unsteady voice, increased muscular tone.

0  1  2  3  4

**8 Somatic (sensory)**

Tinnitus, blurring of vision, hot and cold flushes, feelings of weakness, pricking sensation.

0  1  2  3  4

**9 Cardiovascular symptoms**

Tachycardia, palpitations, pain in chest, throbbing of vessels, fainting feelings, missing beat

0  1  2  3  4

**10 Respiratory symptoms**

Pressure or constriction in chest, choking feelings, sighing, dyspnea.

0  1  2  3  4

**11 Gastrointestinal symptoms**

Difficulty in swallowing, wind abdominal pain, burning sensations, abdominal fullness, nausea, vomiting, borborygmi, looseness of bowels, loss of weight, constipation.

0  1  2  3  4

**12 Genitourinary symptoms**

Frequency of micturition, urgency of micturition, amenorrhea, menorrhagia, development of frigidity, premature ejaculation, loss of libido, impotence

0  1  2  3  4

**13 Autonomic symptoms**

Dry mouth, flushing, pallor, tendency to sweat, giddiness, tension headache, raising of hair.

0  1  2  3  4

**14 Behavior at interview**

Fidgeting, restlessness or pacing, tremor of hands, furrowed brow, strained face, sighing or rapid respiration, facial pallor, swallowing, etc.

0  1  2  3  4

0 ~ 7: No anxiety

8~14: Possible anxiety

15~21: Mild anxiety

22~29: Obvious anxiety

>29: Severe anxiety

3. Functional Living Index Emesis (FLIE)<sup>3</sup>

## Functional Living Index Emesis (FLIE)

1. How much nausea have you had in the past 3 days?

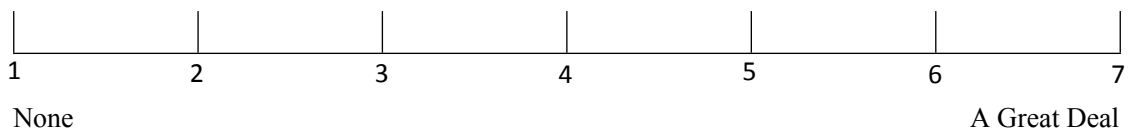

8  
9  
10  
11  
12  
13  
14  
15

2. Has nausea affected your ability to maintain usual recreation or leisure activities in the past 3 days?

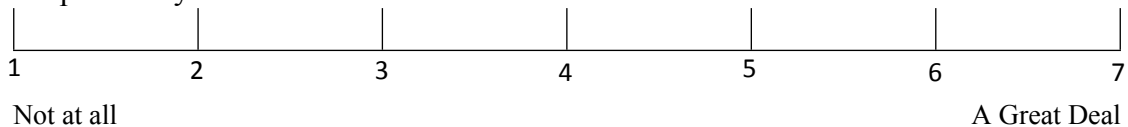

16  
17  
18  
19  
20  
21  
22  
23

3. Has nausea affected your ability to make a meal or do minor household repairs during the past 3 days?

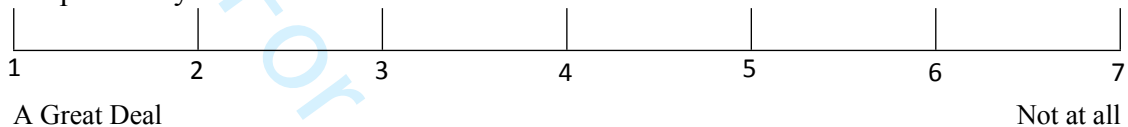

24  
25  
26  
27  
28  
29  
30  
31  
32  
33  
34  
35  
36  
37  
38  
39  
40  
41  
42  
43  
44  
45

4. How much has nausea affected your ability to enjoy a meal in the past 3 days?

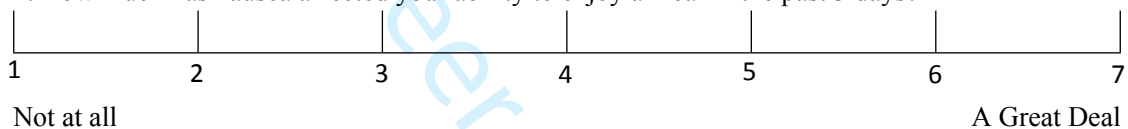

32  
33  
34  
35  
36  
37  
38  
39  
40  
41  
42  
43  
44  
45  
46  
47  
48  
49  
50  
51  
52

5. How much has nausea affected your ability to enjoy liquid refreshment in the past 3 days?

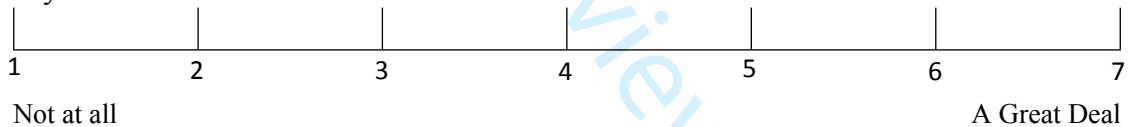

38  
39  
40  
41  
42  
43  
44  
45  
46  
47  
48  
49  
50  
51  
52  
53  
54  
55  
56  
57  
58  
59  
60

6. How much has nausea affected your willingness to see and spend time with family and friends, in the past 3 days?

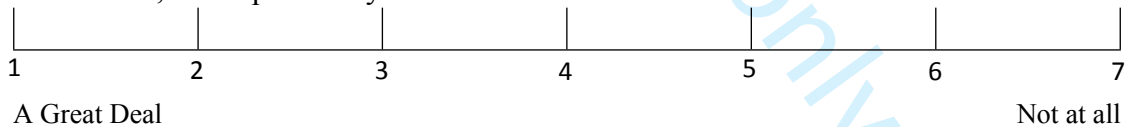

46  
47  
48  
49  
50  
51  
52  
53  
54  
55  
56  
57  
58  
59  
60

7. Has nausea affected your daily functioning in the past 3 days?

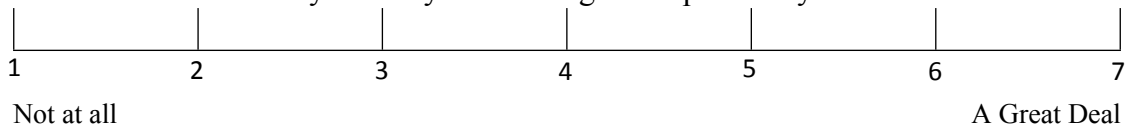

53  
54  
55  
56  
57  
58  
59  
60

8. Rate the degree to which your nausea has imposed a hardship on you (personally) in the past 3 days.

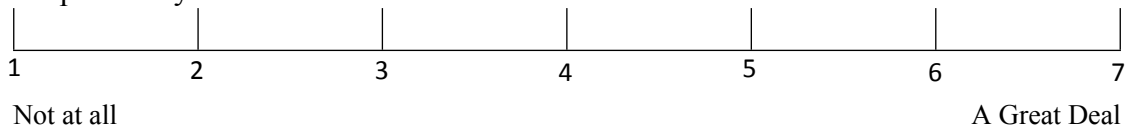



1  
2  
3  
4  
5  
6  
7  
8  
9  
10  
11  
12  
13  
14  
15  
16  
17  
18  
19  
20  
21  
22  
23  
24  
25  
26  
27  
28  
29  
30  
31  
32  
33  
34  
35  
36  
37  
38  
39  
40  
41  
42  
43  
44  
45  
46  
47  
48  
49  
50  
51  
52  
53  
54  
55  
56  
57  
58  
59  
60

9. Rate the degree to which your nausea has imposed a hardship on those closest to you in the past 3 days.

1 2 3 4 5 6 7

Not at all A Great Deal

10. How much vomiting have you had in the past 3 days?

1 2 3 4 5 6 7

None A Great Deal

11. Has vomiting affected your ability to maintain usual recreation or leisure activities during the past 3 days?

1 2 3 4 5 6 7

A Great Deal Not at all

12. Has vomiting affected your ability to complete your usual household tasks during the past 3 days?

1 2 3 4 5 6 7

Not at all A Great Deal

13. How much has vomiting affected your ability to enjoy a meal in the past 3 days?

1 2 3 4 5 6 7

Not at all A Great Deal

14. How much has vomiting affected your ability to enjoy liquid refreshment in the past 3 days?

1 2 3 4 5 6 7

Not at all A Great Deal

15. How much has vomiting affected your willingness to see and spend time with friends, in the past 3 days?

1 2 3 4 5 6 7

A Great Deal Not at all

16. Has vomiting affected your daily functioning during the past 3 days?

1 2 3 4 5 6 7

Not at all A Great Deal

1  
2  
3  
4  
5  
6  
7  
8  
9  
10  
11  
12  
13  
14  
15  
16  
17  
18  
19  
20  
21  
22  
23  
24  
25  
26  
27  
28  
29  
30  
31  
32  
33  
34  
35  
36  
37  
38  
39  
40  
41  
42  
43  
44  
45  
46  
47  
48  
49  
50  
51  
52  
53  
54  
55  
56  
57  
58  
59  
60

17. Rate the degree to which your vomiting has imposed a hardship on you (personally) in the past 3 days.

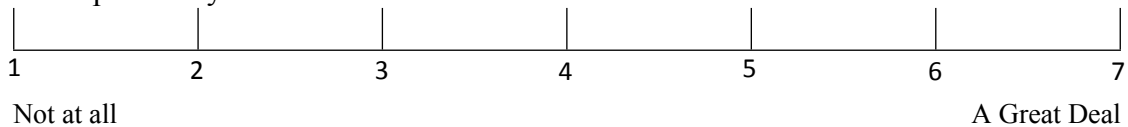

18. Rate the degree to which your vomiting has imposed a hardship on those closest to you in the past 3 days.

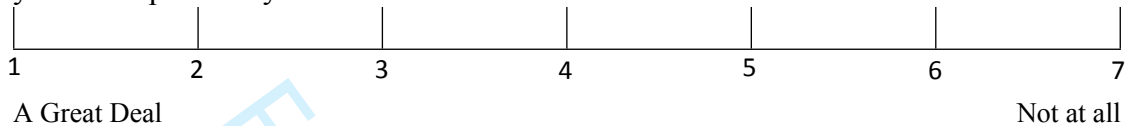

### References:

- 1 Bach CM, Nogler M, Steingruber IE, *et al.* Scoring Systems in Total Knee Arthroplasty. 2002;:184–96.
- 2 HAMILTON M. The assessment of anxiety states by rating. *Br J Med Psychol* 1959;**32**:50–5.<http://www.ncbi.nlm.nih.gov/pubmed/13638508>
- 3 Lindley CM, Hirsch JD, O’Neill C V., *et al.* Quality of life consequences of emesis. *Qual Life Res* 1992;**1**:331–40.

# Reporting checklist for protocol of a clinical trial.

Based on the SPIRIT guidelines.

## Instructions to authors

Complete this checklist by entering the page numbers from your manuscript where readers will find each of the items listed below.

Your article may not currently address all the items on the checklist. Please modify your text to include the missing information. If you are certain that an item does not apply, please write "n/a" and provide a short explanation.

Upload your completed checklist as an extra file when you submit to a journal.

In your methods section, say that you used the SPIRIT reporting guidelines, and cite them as:

Chan A-W, Tetzlaff JM, Altman DG, Laupacis A, Gøtzsche PC, Krleža-Jerić K, Hróbjartsson A, Mann H, Dickersin K, Berlin J, Doré C, Parulekar W, Summerskill W, Groves T, Schulz K, Sox H, Rockhold FW, Rennie D, Moher D. SPIRIT 2013 Statement: Defining standard protocol items for clinical trials. *Ann Intern Med.* 2013;158(3):200-207

|                                             |     | Reporting Item                                                                                               | Page Number |
|---------------------------------------------|-----|--------------------------------------------------------------------------------------------------------------|-------------|
| Title                                       | #1  | Descriptive title identifying the study design, population, interventions, and, if applicable, trial acronym | 1           |
| Trial registration                          | #2a | Trial identifier and registry name. If not yet registered, name of intended registry                         | 1           |
| Trial registration: data set                | #2b | All items from the World Health Organization Trial Registration Data Set                                     | 1           |
| Protocol version                            | #3  | Date and version identifier                                                                                  | 1           |
| Funding                                     | #4  | Sources and types of financial, material, and other support                                                  | 13          |
| Roles and responsibilities: contributorship | #5a | Names, affiliations, and roles of protocol contributors                                                      | 1-2         |
| Roles and responsibilities:                 | #5b | Name and contact information for the trial sponsor                                                           | n/a         |

|    |                      |      |                                                                   |     |
|----|----------------------|------|-------------------------------------------------------------------|-----|
| 1  | sponsor contact      |      |                                                                   |     |
| 2  | information          |      |                                                                   |     |
| 3  |                      |      |                                                                   |     |
| 4  | Roles and            | #5c  | Role of study sponsor and funders, if any, in study design;       | 13  |
| 5  | responsibilities:    |      | collection, management, analysis, and interpretation of           |     |
| 6  | sponsor and funder   |      | data; writing of the report; and the decision to submit the       |     |
| 7  |                      |      | report for publication, including whether they will have          |     |
| 8  |                      |      | ultimate authority over any of these activities                   |     |
| 9  |                      |      |                                                                   |     |
| 10 |                      |      |                                                                   |     |
| 11 |                      |      |                                                                   |     |
| 12 | Roles and            | #5d  | Composition, roles, and responsibilities of the coordinating      | n/a |
| 13 | responsibilities:    |      | centre, steering committee, endpoint adjudication                 |     |
| 14 | committees           |      | committee, data management team, and other individuals or         |     |
| 15 |                      |      | groups overseeing the trial, if applicable (see Item 21a for      |     |
| 16 |                      |      | data monitoring committee)                                        |     |
| 17 |                      |      |                                                                   |     |
| 18 |                      |      |                                                                   |     |
| 19 |                      |      |                                                                   |     |
| 20 | Background and       | #6a  | Description of research question and justification for            | 4   |
| 21 | rationale            |      | undertaking the trial, including summary of relevant studies      |     |
| 22 |                      |      | (published and unpublished) examining benefits and harms          |     |
| 23 |                      |      | for each intervention                                             |     |
| 24 |                      |      |                                                                   |     |
| 25 |                      |      |                                                                   |     |
| 26 |                      |      |                                                                   |     |
| 27 | Background and       | #6b  | Explanation for choice of comparators                             | 4   |
| 28 | rationale: choice of |      |                                                                   |     |
| 29 | comparators          |      |                                                                   |     |
| 30 |                      |      |                                                                   |     |
| 31 |                      |      |                                                                   |     |
| 32 | Objectives           | #7   | Specific objectives or hypotheses                                 | 3   |
| 33 |                      |      |                                                                   |     |
| 34 |                      |      |                                                                   |     |
| 35 | Trial design         | #8   | Description of trial design including type of trial (eg, parallel | 3   |
| 36 |                      |      | group, crossover, factorial, single group), allocation ratio,     |     |
| 37 |                      |      | and framework (eg, superiority, equivalence, non-inferiority,     |     |
| 38 |                      |      | exploratory)                                                      |     |
| 39 |                      |      |                                                                   |     |
| 40 |                      |      |                                                                   |     |
| 41 |                      |      |                                                                   |     |
| 42 | Study setting        | #9   | Description of study settings (eg, community clinic,              | 5-6 |
| 43 |                      |      | academic hospital) and list of countries where data will be       |     |
| 44 |                      |      | collected. Reference to where list of study sites can be          |     |
| 45 |                      |      | obtained                                                          |     |
| 46 |                      |      |                                                                   |     |
| 47 |                      |      |                                                                   |     |
| 48 | Eligibility criteria | #10  | Inclusion and exclusion criteria for participants. If applicable, | 7   |
| 49 |                      |      | eligibility criteria for study centres and individuals who will   |     |
| 50 |                      |      | perform the interventions (eg, surgeons, psychotherapists)        |     |
| 51 |                      |      |                                                                   |     |
| 52 |                      |      |                                                                   |     |
| 53 |                      |      |                                                                   |     |
| 54 | Interventions:       | #11a | Interventions for each group with sufficient detail to allow      | 7-8 |
| 55 | description          |      | replication, including how and when they will be                  |     |
| 56 |                      |      | administered                                                      |     |
| 57 |                      |      |                                                                   |     |
| 58 |                      |      |                                                                   |     |
| 59 |                      |      |                                                                   |     |
| 60 |                      |      |                                                                   |     |

|    |                      |      |                                                                  |    |
|----|----------------------|------|------------------------------------------------------------------|----|
| 1  | Interventions:       | #11b | Criteria for discontinuing or modifying allocated                | 9  |
| 2  | modifications        |      | interventions for a given trial participant (eg, drug dose       |    |
| 3  |                      |      | change in response to harms, participant request, or             |    |
| 4  |                      |      | improving / worsening disease)                                   |    |
| 5  |                      |      |                                                                  |    |
| 6  |                      |      |                                                                  |    |
| 7  |                      |      |                                                                  |    |
| 8  | Interventions:       | #11c | Strategies to improve adherence to intervention protocols,       | 9  |
| 9  | adherence            |      | and any procedures for monitoring adherence (eg, drug            |    |
| 10 |                      |      | tablet return; laboratory tests)                                 |    |
| 11 |                      |      |                                                                  |    |
| 12 |                      |      |                                                                  |    |
| 13 | Interventions:       | #11d | Relevant concomitant care and interventions that are             | 9  |
| 14 | concomitant care     |      | permitted or prohibited during the trial                         |    |
| 15 |                      |      |                                                                  |    |
| 16 |                      |      |                                                                  |    |
| 17 | Outcomes             | #12  | Primary, secondary, and other outcomes, including the            | 9  |
| 18 |                      |      | specific measurement variable (eg, systolic blood pressure),     |    |
| 19 |                      |      | analysis metric (eg, change from baseline, final value, time     |    |
| 20 |                      |      | to event), method of aggregation (eg, median, proportion),       |    |
| 21 |                      |      | and time point for each outcome. Explanation of the clinical     |    |
| 22 |                      |      | relevance of chosen efficacy and harm outcomes is strongly       |    |
| 23 |                      |      | recommended                                                      |    |
| 24 |                      |      |                                                                  |    |
| 25 |                      |      |                                                                  |    |
| 26 |                      |      |                                                                  |    |
| 27 |                      |      |                                                                  |    |
| 28 | Participant timeline | #13  | Time schedule of enrolment, interventions (including any         | 17 |
| 29 |                      |      | run-ins and washouts), assessments, and visits for               |    |
| 30 |                      |      | participants. A schematic diagram is highly recommended          |    |
| 31 |                      |      | (see Figure)                                                     |    |
| 32 |                      |      |                                                                  |    |
| 33 |                      |      |                                                                  |    |
| 34 |                      |      |                                                                  |    |
| 35 | Sample size          | #14  | Estimated number of participants needed to achieve study         | 6  |
| 36 |                      |      | objectives and how it was determined, including clinical and     |    |
| 37 |                      |      | statistical assumptions supporting any sample size               |    |
| 38 |                      |      | calculations                                                     |    |
| 39 |                      |      |                                                                  |    |
| 40 |                      |      |                                                                  |    |
| 41 |                      |      |                                                                  |    |
| 42 | Recruitment          | #15  | Strategies for achieving adequate participant enrolment to       | 6  |
| 43 |                      |      | reach target sample size                                         |    |
| 44 |                      |      |                                                                  |    |
| 45 |                      |      |                                                                  |    |
| 46 | Allocation: sequence | #16a | Method of generating the allocation sequence (eg,                | 6  |
| 47 | generation           |      | computer-generated random numbers), and list of any              |    |
| 48 |                      |      | factors for stratification. To reduce predictability of a random |    |
| 49 |                      |      | sequence, details of any planned restriction (eg, blocking)      |    |
| 50 |                      |      | should be provided in a separate document that is                |    |
| 51 |                      |      | unavailable to those who enrol participants or assign            |    |
| 52 |                      |      | interventions                                                    |    |
| 53 |                      |      |                                                                  |    |
| 54 |                      |      |                                                                  |    |
| 55 |                      |      |                                                                  |    |
| 56 |                      |      |                                                                  |    |
| 57 | Allocation           | #16b | Mechanism of implementing the allocation sequence (eg,           | 6  |
| 58 | concealment          |      | central telephone; sequentially numbered, opaque, sealed         |    |
| 59 |                      |      |                                                                  |    |
| 60 |                      |      |                                                                  |    |

|    |                        |      |                                                                |     |
|----|------------------------|------|----------------------------------------------------------------|-----|
| 1  | mechanism              |      | envelopes), describing any steps to conceal the sequence       |     |
| 2  |                        |      | until interventions are assigned                               |     |
| 3  |                        |      |                                                                |     |
| 4  | Allocation:            | #16c | Who will generate the allocation sequence, who will enrol      | 6   |
| 5  | implementation         |      | participants, and who will assign participants to              |     |
| 6  |                        |      | interventions                                                  |     |
| 7  |                        |      |                                                                |     |
| 8  |                        |      |                                                                |     |
| 9  | Blinding (masking)     | #17a | Who will be blinded after assignment to interventions (eg,     | 6-7 |
| 10 |                        |      | trial participants, care providers, outcome assessors, data    |     |
| 11 |                        |      | analysts), and how                                             |     |
| 12 |                        |      |                                                                |     |
| 13 |                        |      |                                                                |     |
| 14 | Blinding (masking):    | #17b | If blinded, circumstances under which unblinding is            | 6-7 |
| 15 | emergency              |      | permissible, and procedure for revealing a participant's       |     |
| 16 | unblinding             |      | allocated intervention during the trial                        |     |
| 17 |                        |      |                                                                |     |
| 18 |                        |      |                                                                |     |
| 19 |                        |      |                                                                |     |
| 20 | Data collection plan   | #18a | Plans for assessment and collection of outcome, baseline,      | 11  |
| 21 |                        |      | and other trial data, including any related processes to       |     |
| 22 |                        |      | promote data quality (eg, duplicate measurements, training     |     |
| 23 |                        |      | of assessors) and a description of study instruments (eg,      |     |
| 24 |                        |      | questionnaires, laboratory tests) along with their reliability |     |
| 25 |                        |      | and validity, if known. Reference to where data collection     |     |
| 26 |                        |      | forms can be found, if not in the protocol                     |     |
| 27 |                        |      |                                                                |     |
| 28 |                        |      |                                                                |     |
| 29 |                        |      |                                                                |     |
| 30 |                        |      |                                                                |     |
| 31 | Data collection plan:  | #18b | Plans to promote participant retention and complete follow-    | 11  |
| 32 | retention              |      | up, including list of any outcome data to be collected for     |     |
| 33 |                        |      | participants who discontinue or deviate from intervention      |     |
| 34 |                        |      | protocols                                                      |     |
| 35 |                        |      |                                                                |     |
| 36 |                        |      |                                                                |     |
| 37 |                        |      |                                                                |     |
| 38 | Data management        | #19  | Plans for data entry, coding, security, and storage, including | 11  |
| 39 |                        |      | any related processes to promote data quality (eg, double      |     |
| 40 |                        |      | data entry; range checks for data values). Reference to        |     |
| 41 |                        |      | where details of data management procedures can be             |     |
| 42 |                        |      | found, if not in the protocol                                  |     |
| 43 |                        |      |                                                                |     |
| 44 |                        |      |                                                                |     |
| 45 |                        |      |                                                                |     |
| 46 | Statistics: outcomes   | #20a | Statistical methods for analysing primary and secondary        | 11  |
| 47 |                        |      | outcomes. Reference to where other details of the statistical  |     |
| 48 |                        |      | analysis plan can be found, if not in the protocol             |     |
| 49 |                        |      |                                                                |     |
| 50 |                        |      |                                                                |     |
| 51 | Statistics: additional | #20b | Methods for any additional analyses (eg, subgroup and          | 11  |
| 52 | analyses               |      | adjusted analyses)                                             |     |
| 53 |                        |      |                                                                |     |
| 54 |                        |      |                                                                |     |
| 55 | Statistics: analysis   | #20c | Definition of analysis population relating to protocol non-    | 11  |
| 56 | population and         |      | adherence (eg, as randomised analysis), and any statistical    |     |
| 57 | missing data           |      | methods to handle missing data (eg, multiple imputation)       |     |
| 58 |                        |      |                                                                |     |
| 59 |                        |      |                                                                |     |
| 60 |                        |      |                                                                |     |

|    |                    |      |                                                                  |     |
|----|--------------------|------|------------------------------------------------------------------|-----|
| 1  | Data monitoring:   | #21a | Composition of data monitoring committee (DMC); summary          | n/a |
| 2  | formal committee   |      | of its role and reporting structure; statement of whether it is  |     |
| 3  |                    |      | independent from the sponsor and competing interests; and        |     |
| 4  |                    |      | reference to where further details about its charter can be      |     |
| 5  |                    |      | found, if not in the protocol. Alternatively, an explanation of  |     |
| 6  |                    |      | why a DMC is not needed                                          |     |
| 7  |                    |      |                                                                  |     |
| 8  |                    |      |                                                                  |     |
| 9  |                    |      |                                                                  |     |
| 10 |                    |      |                                                                  |     |
| 11 | Data monitoring:   | #21b | Description of any interim analyses and stopping guidelines,     | n/a |
| 12 | interim analysis   |      | including who will have access to these interim results and      |     |
| 13 |                    |      | make the final decision to terminate the trial                   |     |
| 14 |                    |      |                                                                  |     |
| 15 |                    |      |                                                                  |     |
| 16 | Harms              | #22  | Plans for collecting, assessing, reporting, and managing         | 11  |
| 17 |                    |      | solicited and spontaneously reported adverse events and          |     |
| 18 |                    |      | other unintended effects of trial interventions or trial conduct |     |
| 19 |                    |      |                                                                  |     |
| 20 |                    |      |                                                                  |     |
| 21 | Auditing           | #23  | Frequency and procedures for auditing trial conduct, if any,     | 11  |
| 22 |                    |      | and whether the process will be independent from                 |     |
| 23 |                    |      | investigators and the sponsor                                    |     |
| 24 |                    |      |                                                                  |     |
| 25 |                    |      |                                                                  |     |
| 26 |                    |      |                                                                  |     |
| 27 | Research ethics    | #24  | Plans for seeking research ethics committee / institutional      | 12  |
| 28 | approval           |      | review board (REC / IRB) approval                                |     |
| 29 |                    |      |                                                                  |     |
| 30 |                    |      |                                                                  |     |
| 31 | Protocol           | #25  | Plans for communicating important protocol modifications         | 12  |
| 32 | amendments         |      | (eg, changes to eligibility criteria, outcomes, analyses) to     |     |
| 33 |                    |      | relevant parties (eg, investigators, REC / IRBs, trial           |     |
| 34 |                    |      | participants, trial registries, journals, regulators)            |     |
| 35 |                    |      |                                                                  |     |
| 36 |                    |      |                                                                  |     |
| 37 | Consent or assent  | #26a | Who will obtain informed consent or assent from potential        | 12  |
| 38 |                    |      | trial participants or authorised surrogates, and how (see        |     |
| 39 |                    |      | Item 32)                                                         |     |
| 40 |                    |      |                                                                  |     |
| 41 |                    |      |                                                                  |     |
| 42 |                    |      |                                                                  |     |
| 43 | Consent or assent: | #26b | Additional consent provisions for collection and use of          | 12  |
| 44 | ancillary studies  |      | participant data and biological specimens in ancillary           |     |
| 45 |                    |      | studies, if applicable                                           |     |
| 46 |                    |      |                                                                  |     |
| 47 |                    |      |                                                                  |     |
| 48 | Confidentiality    | #27  | How personal information about potential and enrolled            | 12  |
| 49 |                    |      | participants will be collected, shared, and maintained in        |     |
| 50 |                    |      | order to protect confidentiality before, during, and after the   |     |
| 51 |                    |      | trial                                                            |     |
| 52 |                    |      |                                                                  |     |
| 53 |                    |      |                                                                  |     |
| 54 |                    |      |                                                                  |     |
| 55 | Declaration of     | #28  | Financial and other competing interests for principal            | 2   |
| 56 | interests          |      | investigators for the overall trial and each study site          |     |
| 57 |                    |      |                                                                  |     |
| 58 |                    |      |                                                                  |     |
| 59 | Data access        | #29  | Statement of who will have access to the final trial dataset,    | 12  |
| 60 |                    |      |                                                                  |     |

|    |                       |      |                                                                 |     |
|----|-----------------------|------|-----------------------------------------------------------------|-----|
| 1  |                       |      | and disclosure of contractual agreements that limit such        |     |
| 2  |                       |      | access for investigators                                        |     |
| 3  |                       |      |                                                                 |     |
| 4  | Ancillary and post    | #30  | Provisions, if any, for ancillary and post-trial care, and for  | 12  |
| 5  | trial care            |      | compensation to those who suffer harm from trial                |     |
| 6  |                       |      | participation                                                   |     |
| 7  |                       |      |                                                                 |     |
| 8  |                       |      |                                                                 |     |
| 9  | Dissemination policy: | #31a | Plans for investigators and sponsor to communicate trial        | 12  |
| 10 | trial results         |      | results to participants, healthcare professionals, the public,  |     |
| 11 |                       |      | and other relevant groups (eg, via publication, reporting in    |     |
| 12 |                       |      | results databases, or other data sharing arrangements),         |     |
| 13 |                       |      | including any publication restrictions                          |     |
| 14 |                       |      |                                                                 |     |
| 15 |                       |      |                                                                 |     |
| 16 |                       |      |                                                                 |     |
| 17 | Dissemination policy: | #31b | Authorship eligibility guidelines and any intended use of       | 12  |
| 18 | authorship            |      | professional writers                                            |     |
| 19 |                       |      |                                                                 |     |
| 20 |                       |      |                                                                 |     |
| 21 | Dissemination policy: | #31c | Plans, if any, for granting public access to the full protocol, | 12  |
| 22 | reproducible          |      | participant-level dataset, and statistical code                 |     |
| 23 | research              |      |                                                                 |     |
| 24 |                       |      |                                                                 |     |
| 25 |                       |      |                                                                 |     |
| 26 |                       |      |                                                                 |     |
| 27 | Informed consent      | #32  | Model consent form and other related documentation given        | n/a |
| 28 | materials             |      | to participants and authorised surrogates                       |     |
| 29 |                       |      |                                                                 |     |
| 30 |                       |      |                                                                 |     |
| 31 | Biological specimens  | #33  | Plans for collection, laboratory evaluation, and storage of     | n/a |
| 32 |                       |      | biological specimens for genetic or molecular analysis in the   |     |
| 33 |                       |      | current trial and for future use in ancillary studies, if       |     |
| 34 |                       |      | applicable                                                      |     |
| 35 |                       |      |                                                                 |     |
| 36 |                       |      |                                                                 |     |

37 The SPIRIT checklist is distributed under the terms of the Creative Commons Attribution License CC-  
 38 BY-ND 3.0. This checklist was completed on 06. July 2018 using <http://www.goodreports.org/>, a tool  
 39 made by the [EQUATOR Network](#) in collaboration with [Penelope.ai](#)  
 40  
 41  
 42  
 43  
 44  
 45  
 46  
 47  
 48  
 49  
 50  
 51  
 52  
 53  
 54  
 55  
 56  
 57  
 58  
 59  
 60



# BMJ Open

## Application of electroacupuncture for postoperative pain management after total knee arthroplasty: a study protocol for a single-blinded, randomised placebo-controlled trial

|                                 |                                                                                                                                                                                                                                                                                                                                                                                                                                                                                                                                                                                                                                                                                                                                                                                                                                                 |
|---------------------------------|-------------------------------------------------------------------------------------------------------------------------------------------------------------------------------------------------------------------------------------------------------------------------------------------------------------------------------------------------------------------------------------------------------------------------------------------------------------------------------------------------------------------------------------------------------------------------------------------------------------------------------------------------------------------------------------------------------------------------------------------------------------------------------------------------------------------------------------------------|
| Journal:                        | <i>BMJ Open</i>                                                                                                                                                                                                                                                                                                                                                                                                                                                                                                                                                                                                                                                                                                                                                                                                                                 |
| Manuscript ID                   | bmjopen-2018-026084.R2                                                                                                                                                                                                                                                                                                                                                                                                                                                                                                                                                                                                                                                                                                                                                                                                                          |
| Article Type:                   | Protocol                                                                                                                                                                                                                                                                                                                                                                                                                                                                                                                                                                                                                                                                                                                                                                                                                                        |
| Date Submitted by the Author:   | 02-Mar-2019                                                                                                                                                                                                                                                                                                                                                                                                                                                                                                                                                                                                                                                                                                                                                                                                                                     |
| Complete List of Authors:       | Zhong, Sheng; Shanghai University of Traditional Chinese Medicine<br>Guanghua Hospital of Integrated Traditional Chinese Medicine and Western Medicine<br>Huang, Hai; Shanghai University of Traditional Chinese Medicine<br>Guanghua Hospital of Integrated Traditional Chinese Medicine and Western Medicine<br>Xie, Jun; Shanghai University of Traditional Chinese Medicine<br>Guanghua Hospital of Integrated Traditional Chinese Medicine and Western Medicine<br>Zhao, Ling; Shanghai University of Traditional Chinese Medicine<br>Song, Xiu-ling; Shanghai University of Traditional Chinese Medicine<br>Chen, Yue-lai; Shanghai University of Traditional Chinese Medicine<br>Xiao, Lian-bo; Shanghai University of Traditional Chinese Medicine<br>Guanghua Hospital of Integrated Traditional Chinese Medicine and Western Medicine |
| <b>Primary Subject Heading</b>: | Medical management                                                                                                                                                                                                                                                                                                                                                                                                                                                                                                                                                                                                                                                                                                                                                                                                                              |
| Secondary Subject Heading:      | Research methods                                                                                                                                                                                                                                                                                                                                                                                                                                                                                                                                                                                                                                                                                                                                                                                                                                |
| Keywords:                       | electroacupuncture, postoperative pain, total knee arthroplasty, the study protocol                                                                                                                                                                                                                                                                                                                                                                                                                                                                                                                                                                                                                                                                                                                                                             |
|                                 |                                                                                                                                                                                                                                                                                                                                                                                                                                                                                                                                                                                                                                                                                                                                                                                                                                                 |

SCHOLARONE™  
Manuscripts

1  
2  
3  
4 1 **Application of electroacupuncture for postoperative pain management after total**  
5  
6 2 **knee arthroplasty: a study protocol for a single-blinded, randomised**  
7  
8 3 **placebo-controlled trial**

9  
10  
11 4 Sheng Zhong, Hai Huang, Jun Xie, Ling Zhao, Xiu-ling Song, Yue-lai Chen, Lian-bo  
12  
13  
14 5 Xiao

15  
16  
17 6 **Author Affiliations:**

18  
19  
20 7 Sheng Zhong, MD, Guanghua Hospital, Shanghai University of Traditional Chinese  
21  
22 8 Medicine, Shanghai, China, drcyan@foxmail.com

23  
24  
25 9 Hai Huang, MD, Guanghua Hospital, Shanghai University of Traditional Chinese  
26  
27 10 Medicine, Shanghai, China, haichuan880@163.com

28  
29  
30 11 Jun Xie, MD, Guanghua Hospital, Shanghai University of Traditional Chinese  
31  
32 12 Medicine, Shanghai, China, leoxie199@126.com

33  
34  
35 13 Ling Zhao, PhD, Shanghai University of Traditional Chinese Medicine, Shanghai,  
36  
37 14 China, zhao099@hotmail.com

38  
39  
40 15 Xiu-ling Song, MD, Shanghai University of Traditional Chinese Medicine, Shanghai,  
41  
42 16 China, songxiuling2007@163.com

43  
44  
45 17 Yue-lai Chen, PhD, Shanghai University of Traditional Chinese Medicine, Shanghai,  
46  
47 18 China, chenyuelai@163.com

48  
49  
50 19 Lian-bo Xiao, MD, Guanghua Hospital, Shanghai University of Traditional Chinese  
51  
52 20 Medicine, Shanghai, China, 13701888178@163.com

53  
54  
55  
56 21 **Corresponding Author:**

57  
58  
59 22 Lian-bo Xiao, PhD, Guanghua Hospital, Shanghai University of Traditional Chinese  
60

1  
2  
3  
4 23 Medicine, No. 540 Xinhua Road, Changning District, Shanghai (CN 200052), China,  
5

6  
7 24 13701888178@163.com, +8613701888178  
8

9 25 Lian-bo Xiao and Yue-lai Chen contributed equally to this paper.  
10  
11

12 26

### 13 14 27 **Author Contributions**

15  
16  
17 28 SZ and LBX conceived the study while HH, JX, LZ, XLS designed the study.  
18

19 29 The study protocol was drafted by SZ and LBX, and was revised by YLC. All authors  
20

21 30 approved the final manuscript of this study protocol.  
22  
23

24 31 **Word Count:**2190  
25

### 26 27 32 **Funding**

28  
29 33 This work will be supported by Project of Shanghai University of Traditional  
30

31 34 Chinese Medicine Grant (Y201812).  
32  
33

### 34 35 **Conflicts of Interests**

35  
36 36 The authors declared that there are no potential conflicts of interest with respect  
37

38 37 to the research, authorship, and/or publication of this study.  
39  
40  
41  
42  
43  
44  
45  
46  
47  
48  
49  
50  
51  
52  
53  
54  
55  
56  
57  
58  
59  
60

1  
2  
3 **Abstract:**  
4

5 40 Introduction: The purpose of this study is to assess the efficacy of electroacupuncture  
6  
7  
8 41 to relieve pain and promote functional rehabilitation after total knee surgery.  
9

10 42 Methods and analysis: We propose a single-blinded, randomised placebo-controlled  
11  
12  
13 43 trial to evaluate the efficacy of electroacupuncture. Patients with osteoarthritis (aged  
14  
15  
16 44 55 to 80 years) undergoing unilateral total knee arthroplasty will be included in the  
17  
18 45 trial. They will be randomised to receive either electroacupuncture or  
19  
20  
21 46 sham-electroacupuncture. A total of 110 patients will receive electroacupuncture and  
22  
23 47 sham-electroacupuncture for three days after TKA. Postoperative pain will be  
24  
25  
26 48 measured using VAS score, and the need for an additional dose of opioid and  
27  
28  
29 49 analgesics will be recorded as the primary outcome. Secondary outcomes include  
30  
31 50 knee function and swelling, postoperative anxiety, postoperative nausea and vomiting  
32  
33  
34 51 among other complications.  
35

36 52 Ethics and dissemination: This study has been approved by the ethics committee, and  
37  
38  
39 53 subsequent modifications of the protocol will be reported and approved by it. Written  
40  
41  
42 54 inform content will be obtained from all of the participants or their authorized agents.  
43

44 55 Trial registration number: ChiCTR1800016200  
45

46 56 Keywords: electroacupuncture, postoperative pain, total knee arthroplasty, study  
47  
48  
49 57 protocol  
50

51  
52  
53  
54 **Article Summary**  
55

56  
57 60 *Strengths and limitations of this study*  
58

59  
60 61 1. The study is the first single-blinded, randomised placebo-controlled trial in China  
61

1  
2  
3  
4 62 to assess the efficacy of electroacupuncture to relieve pain and promote functional  
5  
6  
7 63 rehabilitation after total knee surgery.

8  
9 64 2. The study will use an efficient sham-electroacupuncture method that makes it hard  
10  
11  
12 65 for patients with electroacupuncture treatment experience to distinguish between both  
13  
14  
15 66 treatments.

16  
17 67 3. The study is rigorously designed, which includes adequate sample size, proper  
18  
19  
20 68 randomization and allocation concealment, and prospective trial registration to reduce  
21  
22  
23 69 selection and confounding bias.

24  
25 70 4. There is still bias in the implementation of blind method due to the unblinded  
26  
27  
28 71 acupuncturists.

29  
30 72

### 31 32 73 **Introduction**

33  
34  
35 74 Total knee arthroplasty (TKA) is the most frequently performed surgical  
36  
37  
38 75 procedure for end-stage osteoarthritis and rheumatoid arthritis. Moderate to severe  
39  
40  
41 76 postoperative pain is a major complaint in most patients. Acute and subacute  
42  
43  
44 77 postoperative pain is highly associated with persistent post-surgical pain (PPSP),  
45  
46  
47 78 especially when the acute pain is not treated with effective analgesia.<sup>1</sup> A recent study  
48  
49  
50 79 showed that 10%-34% and 7%-23% of patients reported severe pain after TKA and  
51  
52  
53 80 total hip arthroplasty (THA), respectively, which indicates that TKA patients are more  
54  
55  
56 81 likely to develop PPSP.<sup>2</sup> Multimodal analgesia has been used for 20 years and it is  
57  
58  
59 82 considered to be the most effective strategy for PPSP. Abuse of analgesic drugs has  
60  
61  
62 83 increased exposure of the public to the side effects of non-steroidal anti-inflammatory

1  
2  
3  
4 84 drugs (NSAIDs) and opioids.<sup>3,4</sup> Drug-free interventions to reduce pain or opioid  
5  
6 85 consumption are more consistent with the principles of Enhanced Recovery After  
7  
8  
9 86 Surgery (ERAS).

10  
11 87 Clinical trials and systematic reviews have shown that the efficacy of  
12  
13  
14 88 electroacupuncture or acupuncture analgesia is controversial.<sup>5-8</sup> Electrotherapy and  
15  
16  
17 89 acupuncture have been proved to be potentially beneficial for postoperative pain after  
18  
19  
20 90 TKA.<sup>9</sup> Studies on the mechanism of electroacupuncture analgesia indicated that it  
21  
22  
23 91 activates many bioactive chemicals through peripheral, spinal, and supraspinal  
24  
25  
26 92 mechanisms.<sup>10</sup> The supraspinal mechanisms showed EA analgesia is highly associated  
27  
28  
29 93 with descending pain regulation of the periaqueductal grey (PAG) and the rostral  
30  
31  
32 94 ventromedial medulla (RVM).<sup>10,11</sup> The PAG-RVM system is recognized as the central  
33  
34  
35 95 site of action of analgesic agents including opioids, cyclooxygenase inhibitors, and  
36  
37  
38 96 cannabinoids.<sup>12,13</sup> We hypothesize that EA may exert an analgesic effect by activating  
39  
40  
41 97 the PAG-RVM system. Because the mechanism of electroacupuncture analgesia is not  
42  
43  
44 98 clear, there are also opinions that pain relief may be due to expectation or placebo  
45  
46  
47 99 effects.<sup>8</sup> Besides, placebo analgesia is highly associated with both areas of the  
48  
49  
50 100 brain.<sup>14-16</sup> Strict blinding and placebo-controlled is required to rule out the effects of  
51  
52  
53 101 the placebo effect on outcomes.

54  
55  
56 102 The purpose of this study is to assess the efficacy of electroacupuncture on pain  
57  
58  
59 103 relief and promoting functional rehabilitation after total knee surgery. We will use a  
60  
104 large sample size and a reliable blind method of electroacupuncture to ensure a  
105 credible conclusion.

1  
2  
3  
4 1065  
6 107 **Methods and analysis**7  
8  
9 108 *Study Context*

10  
11 109 This study will be a single-blinded, randomised placebo-controlled trial  
12  
13  
14 110 performed at the inpatient ward of Shanghai University of Traditional Chinese  
15  
16  
17 111 Medicine Guanghai Hospital, Shanghai, China. The annual surgical number of total  
18  
19  
20 112 knee arthroplasty for osteoarthritis was about 600 in 2017. We planned to begin  
21  
22  
23 113 recruiting patients from June 2018 and patients preparing for unilateral TKA will be  
24  
25  
26 114 recruited. In this study, there will be 7 investigators, including a chief orthopaedic  
27  
28  
29 115 surgeon (LBX) with 20 years of clinical experience, two orthopaedic physicians (JX  
30  
31  
32 116 and SZ), two Chinese medicine acupuncturists (HH and YLC), and two outcome  
33  
34  
35 117 assessors (LZ, and XLS). Sheng Zhong (SZ) and Hai Huang (HH) will recruit patients  
36  
37  
38 118 who meet the inclusion criteria in the hospital and introduce the patient to the trial  
39  
40  
41 119 process, possible benefits and risks to obtain their informed consent. ERAS  
42  
43  
44 120 programme (Table 1) will be performed by trained nurses and physiotherapists at the  
45  
46  
47 121 inpatient ward. The ERAS programme is routinely applied, but electroacupuncture  
48  
49  
50 122 has been added to analgesia. The schedule and the study flow diagram is shown in  
51  
52  
53 123 Table 2 and Figure 1.

54  
55  
56 124 *Sample size calculation*

57  
58  
59 125 In a previous meta-analysis study in which pain relief was compared between EA  
60  
126 groups and controls, the minimal mean difference of the two groups based on the  
127 VAS score (on a scale of 0-10) was -1.14 (95% CI, -1.90 to -0.38), and the standard

1  
2  
3  
4 128 deviation was estimated to be 2.<sup>9</sup> Considering a dropout rate of 10%, 110 patients  
5  
6 129 are required to yield a power of 80% with a significance level of 0.05.<sup>17</sup>  
7  
8

9 130 *Randomisation and allocation concealment*  
10

11 131 One hundred and ten patients will be divided into EA and Sham-EA groups with  
12  
13 132 a ratio of 1:1. An independent biostatistician will generate a random sequence using  
14  
15 133 the R (version 3.4.4). A sequence of numbers will be prepared and sealed in an  
16  
17 134 opaque envelope. Only the acupuncturist will be allowed to open the envelope to  
18  
19 135 obtain the grouping code.  
20  
21  
22  
23

24 136 *Single-blinding*  
25

26  
27 137 The acupuncturist will be blinded to the grouping information in advance, and the  
28  
29 138 treatment method according to the grouping information contained in envelopes. All  
30  
31 139 participants, orthopaedic surgeons, and relevant healthcare staff will be blinded to the  
32  
33 140 study. The outcome assessor will not be aware of the treatment that patients received  
34  
35 141 and will only instruct the patient to fill in the scales. The independent biostatistician  
36  
37 142 will also be blinded when performing the statistical analyses. To maximize the  
38  
39 143 blinding of patients, an effective sham electroacupuncture method will be applied  
40  
41 144 with adhesive pads, a dull-tipped placebo needle, and a sham electrical stimulation  
42  
43 145 device. Details of the sham operation design are described in the following part.  
44  
45  
46  
47  
48  
49

50 146 *Eligibility criteria*  
51

52  
53 147 *Eligible*  
54

55  
56 148 (1) Aged 55 to 80 years; (2) Meet the 1995 American College of Rheumatology  
57  
58 149 (ACR) diagnostic criteria for osteoarthritis; (3) Undergoing unilateral total knee  
59  
60



1  
2  
3  
4 150 arthroplasty under general anaesthesia without surgical contraindications; (4)

5  
6  
7 151 American Society of Anesthesiologists (ASA) Grade I or II.

8  
9 152 *Ineligible*

10  
11 153 (1) The area of acupuncture points has skin damage and cannot perform

12  
13  
14 154 acupuncture; (2) Preoperative deep venous thrombosis or swelling of the lower

15  
16  
17 155 extremities; (3) Severe arrhythmia, heart failure, chronic obstructive pulmonary

18  
19  
20 156 disease, epilepsy, mental disease; (4) Received treatment of acupuncture in past 1

21  
22 157 month.

23  
24  
25 158 *Study interventions*

26  
27 159 *EA group*

28  
29  
30 160 Patients will receive early acupuncture analgesia once a day from 24 to 72 hours

31  
32 161 after surgery. The first session of acupuncture treatment will be performed at 24 hours

33  
34 162 postoperatively. Firstly, the adhesive pads will be put on the acupoints of bilateral

35  
36  
37 163 *Futu* (Stomach 32, ST32), *Zusanli* (Stomach 36, ST36), *Yanglingquan* (Gall Bladder

38  
39 164 34, GB34), and *Yinlingquan* (Spleen 9, SP9). 1.5 *cun* acupuncture needles

40  
41  
42 165 (0.25×40mm, Huatuo Inc.) will be manually inserted into the skin through the

43  
44 166 adhesive pads (Figure. 2). When *De-qi* sensation is achieved, subsequent electrical

45  
46  
47 167 stimulation with a frequency of 2Hz, a continuous wave and tolerable intensity by the

48  
49  
50 168 patient will be applied to the four acupoints (GB 34 to ST32 and ST36 to SP9) using a

51  
52  
53 169 Hwato SDZ-V electrical stimulation device (Suzhou Medical Appliance Factory,

54  
55  
56 170 Suzhou, China). Needles with electrical stimulation will be retained for 20 minutes in

57  
58  
59 171 each session. The patients will receive a total of 3 treatments which were given once a

60

1  
2  
3  
4 172 day.

5  
6 173 *Sham-EA group*

7  
8  
9 174 Similar to the EA group, three sessions of acupuncture will be provided at the  
10  
11 175 same time. An adhesive pad will be put on the sham-acupoint which is 20 mm distal  
12  
13  
14 176 to the real acupoint (Figure. 3). The placebo needle has a blunt-tip and it will be  
15  
16  
17 177 manually inserted into the adhesive pads but without skin penetration to provide  
18  
19 178 participant-blinding effects (Figure. 2). The sham electrical stimulation device will  
20  
21  
22 179 have a connecting cord with a broken inner wire with no actual current output.  
23  
24  
25 180 Needles will also be retained for 20 minutes in each session. The patients will receive  
26  
27 181 a total of 3 sham treatments which were given once a day. This Sham-EA method was  
28  
29  
30 182 proved to be effective in a previous study.<sup>18</sup>

31  
32 183 *Postoperative analgesia*

33  
34  
35 184 All patients will receive the same analgesic procedure. Fentanyl  
36  
37 185 patient-controlled analgesia (PCA) will be used at a continuous infusion rate of 0.25  
38  
39 186  $\mu\text{g}/(\text{kg}\cdot\text{h})$  and a bolus of 0.15  $\mu\text{g}/\text{kg}$  with a 10-minute lockout time. Patients will be  
40  
41  
42 187 allowed to use Celebrex 200 mg per day. Besides, additional rescue doses of  
43  
44 188 analgesics will be provided upon demand for patients with a VAS score above 60.

45  
46  
47  
48 189 *Discontinuing criteria*

49  
50  
51 190 (1) Acupuncture cannot be tolerated after surgery or patients that cannot be  
52  
53 191 implemented according to the protocol; (2) Severe physiological and pathological  
54  
55 192 changes were found during surgery and it is not appropriate to receive acupuncture  
56  
57  
58 193 treatment, such as anaesthesia accidents, cardiac-cerebrovascular accidents, nerve or  
59  
60

1  
2  
3  
4 194 vascular injury during surgery; (3) Patients in which the trial arrangement cannot be  
5  
6 195 completed or the safety judgment is affected due to surgical factors after the test; (4)  
7  
8  
9 196 Severe adverse reactions, severe complications, such as deep vein thrombosis,  
10  
11 197 pulmonary embolism and severe allergic reactions.  
12  
13

14  
15 198

16  
17 199 *Outcome*

18  
19 200 *Primary outcome*

20  
21 201 *Pain*

22  
23  
24 202 When the patients are discharged from the operating room, this will be recorded  
25  
26 203 as 0 hours. Patients will put a mark on a 100 mm visual analogue scale to assess the  
27  
28 204 pain of their knee (from no pain to very severe) at 6, 24, 48, and 72 hours after  
29  
30 205 surgery, then assessors record it. Additional PCA dose requirement will be evaluated  
31  
32 206 in this study to reflect the degree of pain. Patients will be trained to adjust the PCA to  
33  
34 207 obtain an additional dose of analgesia depending on the degree of pain. This will be  
35  
36 208 recorded 48 hours after surgery. Patients will be given an additional dose of analgesia  
37  
38 209 upon demand if the VAS score is above 60. The additional use of analgesics within 2  
39  
40 210 weeks after surgery will be recorded in the case report forms.  
41  
42

43  
44 211 *Secondary outcome*

45  
46 212 *Knee function and swelling*

47  
48 213 Knee function will be measured based on Hospital for Special Surgery  
49  
50 214 Knee-Rating Scale <sup>19</sup> (HSS scale) (Supplemental file) at one day before surgery and  
51  
52 215 three days after surgery. All patients will first be educated about the HSS scale by a  
53  
54  
55  
56  
57  
58  
59  
60

1  
2  
3  
4 216 trained researcher until they fully understand the questionnaire, then asked to  
5  
6 217 complete the form according to their actual conditions. At 24 hours after surgery, the  
7  
8  
9 218 outcome assessor will remove the elastic bandage and measure the circumference of  
10  
11  
12 219 the knee at the superior patellar pole. A second measurement will be performed 72  
13  
14  
15 220 hours after surgery.

#### 17 221 *Perioperative anxiety*

19  
20 222 Perioperative anxiety will be measured by the Hamilton Anxiety Scale  
21  
22 223 (HAMA)<sup>20</sup> (Supplemental file) at one day before surgery and three days after surgery.  
23  
24 224 HAMA has 14 levels to assess the severity of a patient's anxiety, and it divides  
25  
26  
27 225 anxiety into physical (7~13) and spiritual (1~6 and 14).

#### 30 226 *Postoperative nausea and vomiting (PONV)*

32  
33 227 PONV will be measured according to vomiting symptoms scores in 4-time points,  
34  
35 228 including on the day of surgery and 1, 2, 3 days after surgery.<sup>21</sup> Functional Living  
36  
37  
38 229 Index-Emesis (FLIE)<sup>22</sup> (Supplemental file) is used to evaluate the effect of PONV on  
39  
40  
41 230 the quality of life, and it will be measured 3 days after surgery.

#### 43 231 *Postoperative complications and adverse events*

45  
46 232 All expected and unexpected adverse events will be measured during the  
47  
48 233 allocated intervention process and during the entire study period. Acupuncture-related  
49  
50  
51 234 adverse events are hematoma and syncope during acupuncture. Other postoperative  
52  
53  
54 235 complications including incision infection, urinary retention, deep vein thrombosis,  
55  
56  
57 236 and postoperative persistent pain will be recorded 6 weeks after surgery. All serious  
58  
59 237 adverse events (SAEs) will be reported immediately to the sponsor to allow further  
60

1  
2  
3  
4 238 investigations into their causes.  
5

6  
7 239 *Data management*  
8

9 240 Data entry will be conducted by two independent trained research assistants using  
10  
11 241 paper CRFs to record the research data after completion of final data collection. As  
12  
13  
14 242 acupuncture has known minimal risks, a formal data monitoring committee will not  
15  
16  
17 243 be required.<sup>8,23</sup> Independent investigators of the hospital staff will monitor and audit  
18  
19  
20 244 the data periodically.  
21

22 245 *Statistical analysis*  
23

24 246 According to the intention to treat (ITT) principle, full analysis set (FAS) and  
25  
26  
27 247 per-protocol set (PPS) will be used for primary analysis. Safety set (SS) will not be  
28  
29  
30 248 required since acupuncture has minimal risks.<sup>8,23</sup> Sensitivity analysis will be  
31  
32  
33 249 performed to determine the impact of incomplete records on results. Missing data will  
34  
35  
36 250 not be imputed. Statistical analysis will be performed using R (version 3.4.4). The  
37  
38 251 difference between the two groups will be calculated and compared using the t-test if  
39  
40  
41 252 the Shapiro-Wilk test showed that the data is normally distributed, otherwise the  
42  
43 253 Mann-Whitney U test will be used. A Pearson  $\chi^2$  or Fisher's exact test will be used to  
44  
45  
46 254 calculate the differences in the count data. Mixed effects models will be used to  
47  
48 255 analyze the trend of changes in VAS scores with two factors of groups and time.<sup>24</sup>  
49

50  
51 256 *Ethics and dissemination*  
52

53 257 This study has been approved by the ethics committee of Shanghai Guanghua  
54  
55  
56 258 Hospital of Integrated Chinese and Western Medicine (approval number AF13v2-2),  
57  
58  
59 259 and any modification of the protocol will be reported and approved by it. Written  
60

1  
2  
3  
4 260 inform consent will be obtained from all participants or their authorized agents. All  
5  
6 261 electroacupuncture treatments will be free and the research data will be strictly  
7  
8  
9 262 confidential. The result of the trial will be presented on the website of the Chinese  
10  
11 263 Clinical Trial Registry and published in peer-reviewed journals.

#### 14 264 *Patient and Public Involvement*

16  
17 265 Patient and public were not involved in the design of this study. The participants  
18  
19 266 will be informed of the result of this study during the follow-up visit. Besides, we will  
20  
21 267 enlist their help in disseminating the research findings.

#### 24 268 **Discussion**

26  
27 269 Drug-free interventions, especially EA, have been proven effective in pain relief  
28  
29 270 and promoting functional rehabilitation,<sup>25,26</sup> and they will have good prospects for  
30  
31 271 relieving opioid abuse or overuse of NSAIDs. However, the effect and mechanism of  
32  
33 272 acupuncture analgesia are not clear, and the placebo effect is considered to play an  
34  
35 273 important role.<sup>8</sup> This study has enough samples to obtain reliable results and we have  
36  
37 274 improved the implementation of blinding to adequately characterize the placebo effect.  
38  
39 275 We hope that the results of the study will provide new evidence for  
40  
41 276 electroacupuncture treatment of postoperative pain in TKA. Another question is to  
42  
43 277 determine if the statistical difference between the two groups is clinically relevant.  
44  
45 278 The minimal clinically important difference (MCID) is a measure that is used to  
46  
47 279 evaluate the clinical significance of an intervention. In the case of standardized  
48  
49 280 multimodal analgesia, the MCID for VAS of postoperative pain after TKA is -22.6  
50  
51 281 (on a scale of 0-100), and the MCID can be also used to evaluate the difference of EA  
52  
53  
54  
55  
56  
57  
58  
59  
60

1  
2  
3  
4 282 and sham.<sup>27</sup>  
5

6 283 Multiple evidence-based ERAS strategies for TKA have been shown to reduce  
7  
8  
9 284 postoperative complications and improve prognosis and patient satisfaction.  
10  
11 285 Postoperative analgesia is an important part of ERAS. This study is based on add-on  
12  
13 286 design, electroacupuncture and sham are applied to two groups of patients who used  
14  
15 287 standard multimodal analgesia to evaluate the benefits of electroacupuncture on  
16  
17 288 postoperative pain in TKA. We recommend EA and more non-drug therapies as a  
18  
19 289 routine treatment in ERAS programme of TKA if the results indicate effectiveness  
20  
21  
22 290 over placebo.  
23  
24  
25  
26  
27  
28  
29

30 292 **Reference**

- 31  
32 293 1 Veal FC, Bereznicki LRE, Thompson AJ, *et al.* Subacute Pain as a Predictor of  
33  
34 294 Long-Term Pain Following Orthopedic Surgery: An Australian Prospective 12  
35  
36 295 Month Observational Cohort Study. *Medicine (Baltimore)* 2015;**94**:e1498.  
37  
38 296 doi:10.1097/MD.0000000000001498  
39  
40  
41  
42 297 2 Beswick AD, Wylde V, Gooberman-Hill R, *et al.* What proportion of patients  
43  
44 298 report long-term pain after total hip or knee replacement for osteoarthritis? A  
45  
46 299 systematic review of prospective studies in unselected patients. *BMJ Open*  
47  
48 300 2012;**2**:e000435. doi:10.1136/bmjopen-2011-000435  
49  
50  
51  
52 301 3 Han C, Li X, Jiang H, *et al.* The use of gabapentin in the management of  
53  
54 302 postoperative pain after total knee arthroplasty. *Medicine (Baltimore)*  
55  
56 303 2016;**95**:e3883. doi:10.1097/MD.0000000000003883  
57  
58  
59  
60

1  
2  
3  
4  
5  
6  
7  
8  
9  
10  
11  
12  
13  
14  
15  
16  
17  
18  
19  
20  
21  
22  
23  
24  
25  
26  
27  
28  
29  
30  
31  
32  
33  
34  
35  
36  
37  
38  
39  
40  
41  
42  
43  
44  
45  
46  
47  
48  
49  
50  
51  
52  
53  
54  
55  
56  
57  
58  
59  
60

- 304 4 Katz J, Buis T, Cohen L. Locked out and still knocking: predictors of excessive  
305 demands for postoperative intravenous patient-controlled analgesia. *Can J*  
306 *Anesth Can d'anesthésie* 2008;**55**:88–99. doi:10.1007/BF03016320
- 307 5 Li X, Wang R, Xing X, *et al.* Acupuncture for Myofascial Pain Syndrome: A  
308 Network Meta-Analysis of 33 Randomized Controlled Trials. *Pain Physician*  
309 2017;**20**:E883–902.
- 310 6 Peng L, Zhang C, Zhou L, *et al.* Traditional manual acupuncture combined  
311 with rehabilitation therapy for shoulder hand syndrome after stroke within the  
312 Chinese healthcare system: a systematic review and meta-analysis. *Clin*  
313 *Rehabil* 2018;**32**:429–39. doi:10.1177/0269215517729528
- 314 7 Ju ZY, Wang K, Cui HS, *et al.* Acupuncture for neuropathic pain in adults.  
315 *Cochrane Database Syst Rev* Published Online First: 2 December 2017.  
316 doi:10.1002/14651858.CD012057.pub2
- 317 8 Manheimer E, Cheng K, Linde K, *et al.* Acupuncture for peripheral joint  
318 osteoarthritis. *Cochrane Database Syst Rev* Published Online First: 20 January  
319 2010. doi:10.1002/14651858.CD001977.pub2
- 320 9 Tedesco D, Gori D, Desai KR, *et al.* Drug-Free Interventions to Reduce Pain or  
321 Opioid Consumption After Total Knee Arthroplasty. *JAMA Surg*  
322 2017;**152**:e172872. doi:10.1001/jamasurg.2017.2872
- 323 10 Zhang R, Lao L, Ren K, *et al.* *Mechanisms of acupuncture-electroacupuncture*  
324 *on persistent pain*. 2014. doi:10.1097/ALN.000000000000101
- 325 11 Zhao Z-Q. Neural mechanism underlying acupuncture analgesia. *Prog*



- 1  
2  
3  
4 326 *Neurobiol* 2008;**85**:355–75. doi:10.1016/j.pneurobio.2008.05.004  
5  
6  
7 327 12 Pogatzki-zahn EM, Segelcke D, Schug SA. Postoperative pain — from  
8  
9 328 mechanisms to treatment. *PAIN Reports* 2017;**2**:e588.  
10  
11 329 doi:10.1097/PR9.0000000000000588  
12  
13  
14 330 13 Leith JL, Wilson AW, Donaldson LF, *et al.* Cyclooxygenase-1-derived  
15  
16 331 prostaglandins in the periaqueductal gray differentially control C- versus  
17  
18 332 A-fiber-evoked spinal nociception. *J Neurosci* 2007;**27**:11296–305.  
19  
20 333 doi:10.1523/JNEUROSCI.2586-07.2007  
21  
22  
23 334 14 Tinnermann A, Geuter S, Sprenger C, *et al.* Interactions between brain and  
24  
25 335 spinal cord mediate value effects in nocebo hyperalgesia. *Science*  
26  
27 336 2017;**358**:105–8. doi:10.1126/science.aan1221  
28  
29  
30 337 15 Grahl A, Onat S, Büchel C. The periaqueductal gray and Bayesian integration  
31  
32 338 in placebo analgesia. *Elife* 2018;**7**. doi:10.7554/eLife.32930  
33  
34  
35 339 16 Eippert F, Bingel U, Schoell ED, *et al.* Activation of the opioidergic  
36  
37 340 descending pain control system underlies placebo analgesia. *Neuron*  
38  
39 341 2009;**63**:533–43. doi:10.1016/j.neuron.2009.07.014  
40  
41  
42 342 17 Chow SC, Wang H, Shao J. *Sample Size Calculations in Clinical Research,*  
43  
44 343 *Second Edition.* Taylor & Francis 2007.  
45  
46  
47 344 18 Liu Z, Liu Y, Xu H, *et al.* Effect of Electroacupuncture on Urinary Leakage  
48  
49 345 Among Women With Stress Urinary Incontinence. *Jama* 2017;**317**:2493.  
50  
51 346 doi:10.1001/jama.2017.7220  
52  
53  
54 347 19 Bach CM, Nogler M, Steingruber IE, *et al.* Scoring Systems in Total Knee  
55  
56  
57  
58  
59  
60

- 1  
2  
3  
4 348 Arthroplasty. 2002;:184–96.
- 5  
6 349 20 HAMILTON M. The assessment of anxiety states by rating. *Br J Med Psychol*  
7  
8  
9 350 1959;**32**:50–5. doi:10.1145/363332.363339
- 10  
11 351 21 Hesketh PJ, Kris MG, Grunberg SM, *et al.* Proposal for classifying the acute  
12  
13  
14 352 emetogenicity of cancer chemotherapy. *J Clin Oncol* 1997;**15**:103–9.  
15  
16  
17 353 doi:10.1200/JCO.1997.15.1.103
- 18  
19 354 22 Lindley CM, Hirsch JD, O’Neill C V., *et al.* Quality of life consequences of  
20  
21  
22 355 emesis. *Qual Life Res* 1992;**1**:331–40.
- 23  
24 356 23 Witt CM, Pach D, Brinkhaus B, *et al.* Safety of Acupuncture: Results of a  
25  
26  
27 357 Prospective Observational Study with 229,230 Patients and Introduction of a  
28  
29  
30 358 Medical Information and Consent Form. *Complement Med Res* 2009;**16**:91–7.  
31  
32  
33 359 doi:10.1159/000209315
- 34  
35 360 24 Detry M, Ma Y. Analyzing repeated measurements using mixed models. *Jama*  
36  
37  
38 361 2016;**315**:407–8. doi:10.1001/jama.2015
- 39  
40 362 25 Chen G, Gu R-X, Xu D-D. [The application of electroacupuncture to  
41  
42  
43 363 postoperative rehabilitation of total knee replacement]. *Zhongguo Zhen Jiu*  
44  
45  
46 364 2012;**32**:309–12.
- 47  
48 365 26 Yue C, Zhang X, Zhu Y, *et al.* Systematic Review of Three Electrical  
49  
50  
51 366 Stimulation Techniques for Rehabilitation After Total Knee Arthroplasty. *J*  
52  
53  
54 367 *Arthroplasty* 2018;**33**:2330–7. doi:10.1016/j.arth.2018.01.070
- 55  
56 368 27 Danoff JR, Goel R, Sutton R, *et al.* How Much Pain Is Significant? Defining  
57  
58  
59 369 the Minimal Clinically Important Difference for the Visual Analog Scale for  
60

1  
2  
3  
4 370 Pain After Total Joint Arthroplasty. *J Arthroplasty* 2018;**33**:S71–S75.e2.

5  
6 371 doi:10.1016/j.arth.2018.02.029

7  
8  
9 372  
10  
11  
12  
13  
14  
15  
16  
17  
18  
19  
20  
21  
22  
23  
24  
25  
26  
27  
28  
29  
30  
31  
32  
33  
34  
35  
36  
37  
38  
39  
40  
41  
42  
43  
44  
45  
46  
47  
48  
49  
50  
51  
52  
53  
54  
55  
56  
57  
58  
59  
60

For peer review only

Table 1. Enhanced Recovery After Surgery Programme

---

Preoperative

---

- 1 Preoperative education
  - 2 Carbohydrate loading preoperatively and avoidance of prolonged starving
  - 3 Use of preoperative probiotics
  - 4 No mechanical bowel preparation
  - 5 No premedication
  - 6 Preemptive analgesia
- 

Intraoperative

---

- 7 Maintenance of normothermia
  - 8 Goal-directed perioperative fluid administration
  - 9 Minimally invasive incision
  - 10 Avoidance of nasogastric tubes and deep vein catheterization
  - 11 Avoidance of bladder catheters, if necessary early removal of bladder catheters
  - 12 Use of tranexamic acid
  - 13 Periarticular local injection analgesia
- 

Postoperative

---

- 14 Multimodal analgesia: PCA analgesia, NSAIDs; Avoidance of opioid analgesia
  - 15 Use of postoperative antiemetic and laxatives
  - 16 Enforced early mobilisation
  - 17 Enforced early postoperative oral feeding
- 

PCA, patient controlled analgesia; NSAIDs, non-steroidal antiinflammatory drugs

376

Table 2. The schedule of trial enrolment, interventions and assessments

|                                                | Enrolment |         | Intervention period |          |          |
|------------------------------------------------|-----------|---------|---------------------|----------|----------|
|                                                | Pre-OP    | 6 hours | 24 hours            | 48 hours | 72 hours |
| <b>Enrolment</b>                               |           |         |                     |          |          |
| Informed consent                               | •         |         |                     |          |          |
| Assessment of eligibility                      | •         |         |                     |          |          |
| Randomisation                                  | •         |         |                     |          |          |
| <b>Interventions</b>                           |           |         |                     |          |          |
| EA                                             |           | •       | •                   | •        | •        |
| Sham-EA                                        |           | •       | •                   | •        | •        |
| <b>Assessments</b>                             |           |         |                     |          |          |
| VAS                                            | •         | •       | •                   | •        | •        |
| Additional dose released by PCA                |           |         |                     | •        |          |
| HSS scale                                      | •         |         |                     |          | •        |
| HAMA score                                     | •         |         |                     |          | •        |
| PONV                                           |           | •       | •                   | •        | •        |
| COK                                            |           |         | •                   |          | •        |
| Additional use of analgesics                   | •         |         |                     |          | •        |
| Postoperative complications and adverse events |           | •       | •                   | •        | •        |

OP, operation; EA, electroacupuncture; VAS, Visual Analogue Score; PCA, patient-controlled analgesia; HSS, hospital for special surgery; HAMA, Hamilton Anxiety Scale; PONV, post-operative nausea and vomiting; COK, circumference of knee

377

1  
2  
3  
4  
5  
6  
7  
8  
9  
10  
11  
12  
13  
14  
15  
16  
17  
18  
19  
20  
21  
22  
23  
24  
25  
26  
27  
28  
29  
30  
31  
32  
33  
34  
35  
36  
37  
38  
39  
40  
41  
42  
43  
44  
45  
46  
47  
48  
49  
50  
51  
52  
53  
54  
55  
56  
57  
58  
59  
60

379 **Figure Legend**

380 Figure 1. The study flow diagram, including participants recruitment, eligibility,  
381 screening, randomization, allocation concealment, and outcome assessments. EA,  
382 electroacupuncture.

383 Figure 2. The difference between the acupuncture needle and placebo. (A) The  
384 placebo needle (left) to be inserted into the adhesive pads and the tip can irritate the  
385 skin. The acupuncture needle (right) to be inserted into the skin through the adhesive  
386 pads. (B) The tip of the placebo needle (left) is blunt.

387 Figure 3. Location of acupoints for the electroacupuncture and sham  
388 electroacupuncture groups. ST32, Stomach 32; GB4, Gall Bladder 34; ST36, Stomach  
389 36; SP9, Spleen 9.



43 Figure 1. Study flow diagram, including participants recruitment, eligibility, screening, randomization,  
44 allocation concealment, and outcome assessments. EA, electroacupuncture.

45 107x122mm (300 x 300 DPI)

1  
2  
3  
4  
5  
6  
7  
8  
9  
10  
11  
12  
13  
14  
15  
16  
17  
18  
19  
20  
21  
22  
23  
24  
25  
26  
27  
28  
29  
30  
31  
32  
33  
34  
35  
36  
37  
38  
39  
40  
41  
42  
43  
44  
45  
46  
47  
48  
49  
50  
51  
52  
53  
54  
55  
56  
57  
58  
59  
60



Figure 2. The difference between acupuncture needle and placebo. (A) The placebo needle (left) to be inserted into the adhesive pads and the tip can irritate the skin. The acupuncture needle (right) to be inserted into the skin through the adhesive pads. (B) The tip of the placebo needle (left) is blunt.

119x90mm (300 x 300 DPI)





Figure 3. Location of acupoints for the electroacupuncture and sham electroacupuncture groups. ST32, Stomach 32; GB4, Gall Bladder 34; ST36, Stomach 36; SP9, Spleen 9.

94x90mm (300 x 300 DPI)

## Supplemental file

### 1. Hospital for Special Surgery Knee-Rating Scale<sup>1</sup>

#### **Hospital for Special Surgery Knee-Rating Scale (HSS)**

| <b>Criteria</b>                                                          | <b>Points</b> |
|--------------------------------------------------------------------------|---------------|
| <b>Pain (30 points)</b>                                                  |               |
| No pain at any time                                                      | 30            |
| No pain on walking                                                       | 15            |
| Mild pain on walking                                                     | 10            |
| Moderate pain on waling                                                  | 5             |
| Severe pain on walking                                                   | 0             |
| No pain at rest                                                          | 15            |
| Mild pain at rest                                                        | 10            |
| Moderate pain at rest                                                    | 5             |
| Severe pain at rest                                                      | 0             |
| <b>Function (22 points)</b>                                              |               |
| Walking and standing unlimited                                           | 12            |
| Walking distance of 5-10 blocks and standing ability intermittent >1/2hr | 10            |
| Walking 1-5 blocks and standing up < 1/2hr                               | 8             |
| Walking less than 1 block                                                | 4             |
| Cannot walk                                                              | 0             |
| Climbing stairs                                                          | 5             |
| Climbing stairs with support                                             | 2             |
| Transfer activity                                                        | 5             |
| Transfer activity with support                                           | 2             |
| <b>Range of Motion (18 points)</b>                                       |               |
| 1 point for each 8 degrees (max 18 points)                               | 18            |
| <b>Muscle Strength (10 points)</b>                                       |               |
| Excellent: cannot break quadriceps power                                 | 10            |
| Good: can break the quadriceps power                                     | 8             |
| Fair: move through the arc of motion                                     | 4             |
| Poor: cannot move through arc of motion                                  | 0             |
| <b>Flexion Deformity (10 points)</b>                                     |               |
| No deformity                                                             | 10            |
| Less than 5 degrees                                                      | 8             |
| 5-10 degrees                                                             | 5             |
| > 10 degrees                                                             | 0             |
| <b>Instability (10 points)</b>                                           |               |
| None                                                                     | 10            |

|                             |    |
|-----------------------------|----|
| Mild: 0-5 degrees           | 8  |
| Moderate: 5-15 degrees      | 5  |
| Severe: > 15degrees         | 0  |
| <b>Subtraction</b>          |    |
| One cane                    | -1 |
| One crutch                  | -2 |
| Two crutches                | -3 |
| Extension lag of 5 degrees  | -2 |
| Extension lag of 10 degrees | -3 |
| Extension lag of 15 degrees | -5 |
| Each 5 degrees of varus     | -1 |
| Each 5 degrees of valgus    | -1 |

Excellent  $\geq 85$

Good = 70-84

Fair = 60-69

Poor  $\leq 60$

## 2. Hamilton Anxiety Rating Scale (HAMA)<sup>2</sup>

### Hamilton Anxiety Rating Scale (HAMA)

Below is a list of phrases that describe certain feeling that people have. Rate the patients by finding the answer which best describes the extent to which he/she has these conditions. Select one of the five responses for each of the fourteen questions.

0 = Not present, 1 = Mild, 2 = Moderate, 3 = Severe, 4 = Very severe.

#### 1 Anxious mood

Worries, anticipation of the worst, fearful anticipation, irritability.

0  1  2  3  4

#### 2 Tension

Feelings of tension, fatigability, startle response, moved to tears easily, trembling, feelings of restlessness, inability to relax.

0  1  2  3  4

#### 3 Fears

Of dark, of strangers, of being left alone, of animals, of traffic, of crowds.

0  1  2  3  4

#### 4 Insomnia

Difficulty in falling asleep, broken sleep, unsatisfying sleep and fatigue on waking, dreams, nightmares, night terrors

0  1  2  3  4

#### 5 Intellectual

Difficulty in concentration, poor memory.

0  1  2  3  4

**6 Depressed mood**

Loss of interest, lack of pleasure in hobbies, depression, early waking, diurnal swing.

0  1  2  3  4

**7 Somatic (muscular)**

Pains and aches, twitching, stiffness, myoclonic jerks, grinding of teeth, unsteady voice, increased muscular tone.

0  1  2  3  4

**8 Somatic (sensory)**

Tinnitus, blurring of vision, hot and cold flushes, feelings of weakness, pricking sensation.

0  1  2  3  4

**9 Cardiovascular symptoms**

Tachycardia, palpitations, pain in chest, throbbing of vessels, fainting feelings, missing beat

0  1  2  3  4

**10 Respiratory symptoms**

Pressure or constriction in chest, choking feelings, sighing, dyspnea.

0  1  2  3  4

**11 Gastrointestinal symptoms**

Difficulty in swallowing, wind abdominal pain, burning sensations, abdominal fullness, nausea, vomiting, borborygmi, looseness of bowels, loss of weight, constipation.

0  1  2  3  4

**12 Genitourinary symptoms**

Frequency of micturition, urgency of micturition, amenorrhea, menorrhagia, development of frigidity, premature ejaculation, loss of libido, impotence

0  1  2  3  4

**13 Autonomic symptoms**

Dry mouth, flushing, pallor, tendency to sweat, giddiness, tension headache, raising of hair.

0  1  2  3  4

**14 Behavior at interview**

Fidgeting, restlessness or pacing, tremor of hands, furrowed brow, strained face, sighing or rapid respiration, facial pallor, swallowing, etc.

0  1  2  3  4

0 ~ 7: No anxiety

8~14: Possible anxiety

15~21: Mild anxiety

22~29: Obvious anxiety

>29: Severe anxiety

3. Functional Living Index Emesis (FLIE)<sup>3</sup>

## Functional Living Index Emesis (FLIE)

1. How much nausea have you had in the past 3 days?

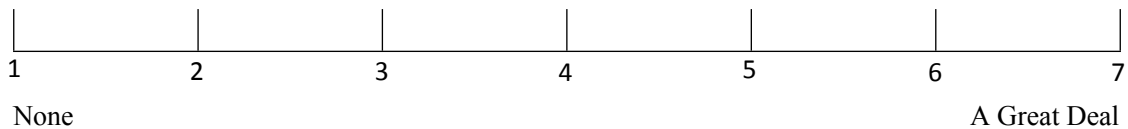

8  
9  
10  
11  
12  
13  
14  
15

2. Has nausea affected your ability to maintain usual recreation or leisure activities in the past 3 days?

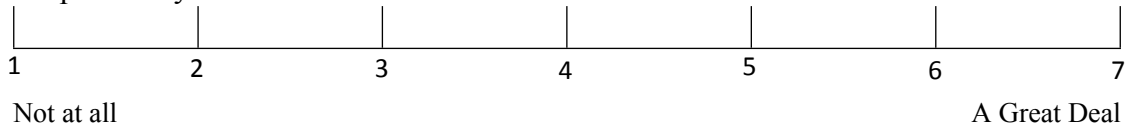

16  
17  
18  
19  
20  
21  
22  
23

3. Has nausea affected your ability to make a meal or do minor household repairs during the past 3 days?

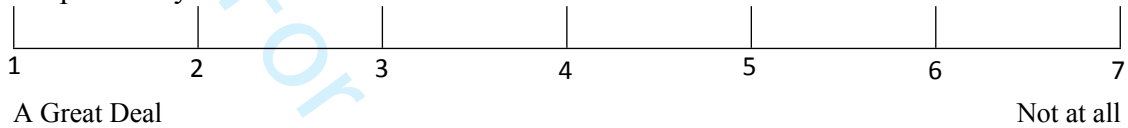

24  
25  
26  
27  
28  
29  
30  
31  
32  
33  
34  
35  
36  
37  
38  
39  
40  
41  
42  
43  
44  
45  
46  
47  
48  
49  
50  
51  
52

4. How much has nausea affected your ability to enjoy a meal in the past 3 days?

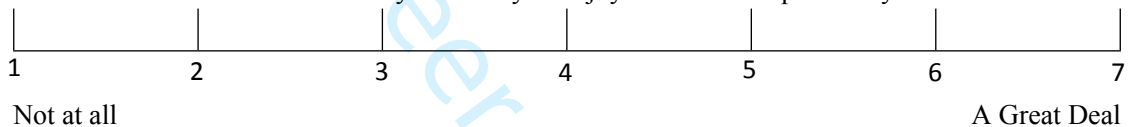

5. How much has nausea affected your ability to enjoy liquid refreshment in the past 3 days?

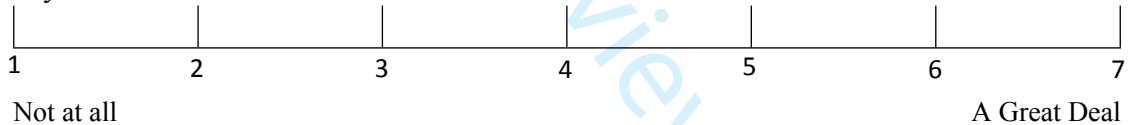

6. How much has nausea affected your willingness to see and spend time with family and friends, in the past 3 days?

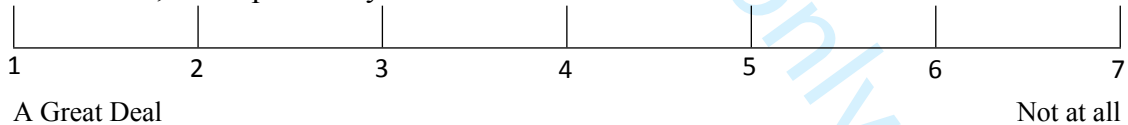

7. Has nausea affected your daily functioning in the past 3 days?



8. Rate the degree to which your nausea has imposed a hardship on you (personally) in the past 3 days.

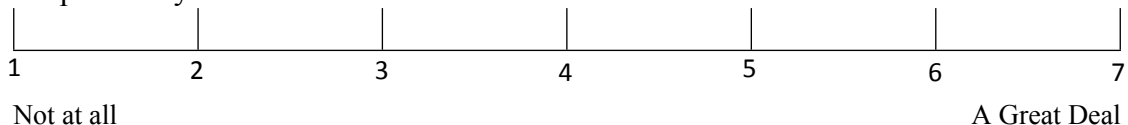

1  
2  
3  
4  
5  
6  
7  
8  
9  
10  
11  
12  
13  
14  
15  
16  
17  
18  
19  
20  
21  
22  
23  
24  
25  
26  
27  
28  
29  
30  
31  
32  
33  
34  
35  
36  
37  
38  
39  
40  
41  
42  
43  
44  
45  
46  
47  
48  
49  
50  
51  
52  
53  
54  
55  
56  
57  
58  
59  
60

9. Rate the degree to which your nausea has imposed a hardship on those closest to you in the past 3 days.

1 2 3 4 5 6 7  
Not at all A Great Deal

10. How much vomiting have you had in the past 3 days?

1 2 3 4 5 6 7  
None A Great Deal

11. Has vomiting affected your ability to maintain usual recreation or leisure activities during the past 3 days?

1 2 3 4 5 6 7  
A Great Deal Not at all

12. Has vomiting affected your ability to complete your usual household tasks during the past 3 days?

1 2 3 4 5 6 7  
Not at all A Great Deal

13. How much has vomiting affected your ability to enjoy a meal in the past 3 days?

1 2 3 4 5 6 7  
Not at all A Great Deal

14. How much has vomiting affected your ability to enjoy liquid refreshment in the past 3 days?

1 2 3 4 5 6 7  
Not at all A Great Deal

15. How much has vomiting affected your willingness to see and spend time with friends, in the past 3 days?

1 2 3 4 5 6 7  
A Great Deal Not at all

16. Has vomiting affected your daily functioning during the past 3 days?

1 2 3 4 5 6 7  
Not at all A Great Deal

1  
2  
3  
4  
5  
6  
7  
8  
9  
10  
11  
12  
13  
14  
15  
16  
17  
18  
19  
20  
21  
22  
23  
24  
25  
26  
27  
28  
29  
30  
31  
32  
33  
34  
35  
36  
37  
38  
39  
40  
41  
42  
43  
44  
45  
46  
47  
48  
49  
50  
51  
52  
53  
54  
55  
56  
57  
58  
59  
60

17. Rate the degree to which your vomiting has imposed a hardship on you (personally) in the past 3 days.

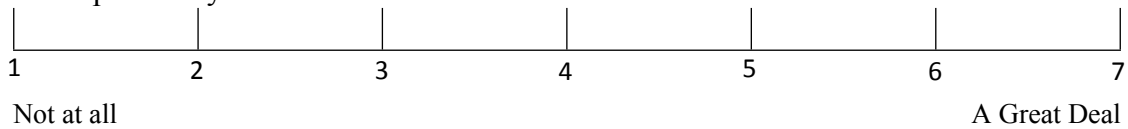

18. Rate the degree to which your vomiting has imposed a hardship on those closest to you in the past 3 days.



### References:

- 1 Bach CM, Nogler M, Steingruber IE, *et al.* Scoring Systems in Total Knee Arthroplasty. 2002;:184–96.
- 2 HAMILTON M. The assessment of anxiety states by rating. *Br J Med Psychol* 1959;**32**:50–5.<http://www.ncbi.nlm.nih.gov/pubmed/13638508>
- 3 Lindley CM, Hirsch JD, O’Neill C V., *et al.* Quality of life consequences of emesis. *Qual Life Res* 1992;**1**:331–40.

# Reporting checklist for protocol of a clinical trial.

Based on the SPIRIT guidelines.

## Instructions to authors

Complete this checklist by entering the page numbers from your manuscript where readers will find each of the items listed below.

Your article may not currently address all the items on the checklist. Please modify your text to include the missing information. If you are certain that an item does not apply, please write "n/a" and provide a short explanation.

Upload your completed checklist as an extra file when you submit to a journal.

In your methods section, say that you used the SPIRIT reporting guidelines, and cite them as:

Chan A-W, Tetzlaff JM, Altman DG, Laupacis A, Gøtzsche PC, Krleža-Jerić K, Hróbjartsson A, Mann H, Dickersin K, Berlin J, Doré C, Parulekar W, Summerskill W, Groves T, Schulz K, Sox H, Rockhold FW, Rennie D, Moher D. SPIRIT 2013 Statement: Defining standard protocol items for clinical trials. *Ann Intern Med.* 2013;158(3):200-207

|                                             |     | Reporting Item                                                                                               | Page Number |
|---------------------------------------------|-----|--------------------------------------------------------------------------------------------------------------|-------------|
| Title                                       | #1  | Descriptive title identifying the study design, population, interventions, and, if applicable, trial acronym | 1           |
| Trial registration                          | #2a | Trial identifier and registry name. If not yet registered, name of intended registry                         | 1           |
| Trial registration: data set                | #2b | All items from the World Health Organization Trial Registration Data Set                                     | 1           |
| Protocol version                            | #3  | Date and version identifier                                                                                  | 1           |
| Funding                                     | #4  | Sources and types of financial, material, and other support                                                  | 13          |
| Roles and responsibilities: contributorship | #5a | Names, affiliations, and roles of protocol contributors                                                      | 1-2         |
| Roles and responsibilities:                 | #5b | Name and contact information for the trial sponsor                                                           | n/a         |



|    |                      |      |                                                                   |     |
|----|----------------------|------|-------------------------------------------------------------------|-----|
| 1  | sponsor contact      |      |                                                                   |     |
| 2  | information          |      |                                                                   |     |
| 3  |                      |      |                                                                   |     |
| 4  | Roles and            | #5c  | Role of study sponsor and funders, if any, in study design;       | 13  |
| 5  | responsibilities:    |      | collection, management, analysis, and interpretation of           |     |
| 6  | sponsor and funder   |      | data; writing of the report; and the decision to submit the       |     |
| 7  |                      |      | report for publication, including whether they will have          |     |
| 8  |                      |      | ultimate authority over any of these activities                   |     |
| 9  |                      |      |                                                                   |     |
| 10 |                      |      |                                                                   |     |
| 11 |                      |      |                                                                   |     |
| 12 | Roles and            | #5d  | Composition, roles, and responsibilities of the coordinating      | n/a |
| 13 | responsibilities:    |      | centre, steering committee, endpoint adjudication                 |     |
| 14 | committees           |      | committee, data management team, and other individuals or         |     |
| 15 |                      |      | groups overseeing the trial, if applicable (see Item 21a for      |     |
| 16 |                      |      | data monitoring committee)                                        |     |
| 17 |                      |      |                                                                   |     |
| 18 |                      |      |                                                                   |     |
| 19 |                      |      |                                                                   |     |
| 20 | Background and       | #6a  | Description of research question and justification for            | 4   |
| 21 | rationale            |      | undertaking the trial, including summary of relevant studies      |     |
| 22 |                      |      | (published and unpublished) examining benefits and harms          |     |
| 23 |                      |      | for each intervention                                             |     |
| 24 |                      |      |                                                                   |     |
| 25 |                      |      |                                                                   |     |
| 26 |                      |      |                                                                   |     |
| 27 | Background and       | #6b  | Explanation for choice of comparators                             | 4   |
| 28 | rationale: choice of |      |                                                                   |     |
| 29 | comparators          |      |                                                                   |     |
| 30 |                      |      |                                                                   |     |
| 31 |                      |      |                                                                   |     |
| 32 | Objectives           | #7   | Specific objectives or hypotheses                                 | 3   |
| 33 |                      |      |                                                                   |     |
| 34 |                      |      |                                                                   |     |
| 35 | Trial design         | #8   | Description of trial design including type of trial (eg, parallel | 3   |
| 36 |                      |      | group, crossover, factorial, single group), allocation ratio,     |     |
| 37 |                      |      | and framework (eg, superiority, equivalence, non-inferiority,     |     |
| 38 |                      |      | exploratory)                                                      |     |
| 39 |                      |      |                                                                   |     |
| 40 |                      |      |                                                                   |     |
| 41 |                      |      |                                                                   |     |
| 42 | Study setting        | #9   | Description of study settings (eg, community clinic,              | 5-6 |
| 43 |                      |      | academic hospital) and list of countries where data will be       |     |
| 44 |                      |      | collected. Reference to where list of study sites can be          |     |
| 45 |                      |      | obtained                                                          |     |
| 46 |                      |      |                                                                   |     |
| 47 |                      |      |                                                                   |     |
| 48 | Eligibility criteria | #10  | Inclusion and exclusion criteria for participants. If applicable, | 7   |
| 49 |                      |      | eligibility criteria for study centres and individuals who will   |     |
| 50 |                      |      | perform the interventions (eg, surgeons, psychotherapists)        |     |
| 51 |                      |      |                                                                   |     |
| 52 |                      |      |                                                                   |     |
| 53 |                      |      |                                                                   |     |
| 54 | Interventions:       | #11a | Interventions for each group with sufficient detail to allow      | 7-8 |
| 55 | description          |      | replication, including how and when they will be                  |     |
| 56 |                      |      | administered                                                      |     |
| 57 |                      |      |                                                                   |     |
| 58 |                      |      |                                                                   |     |
| 59 |                      |      |                                                                   |     |
| 60 |                      |      |                                                                   |     |

|    |                      |      |                                                                  |    |
|----|----------------------|------|------------------------------------------------------------------|----|
| 1  | Interventions:       | #11b | Criteria for discontinuing or modifying allocated                | 9  |
| 2  | modifications        |      | interventions for a given trial participant (eg, drug dose       |    |
| 3  |                      |      | change in response to harms, participant request, or             |    |
| 4  |                      |      | improving / worsening disease)                                   |    |
| 5  |                      |      |                                                                  |    |
| 6  |                      |      |                                                                  |    |
| 7  |                      |      |                                                                  |    |
| 8  | Interventions:       | #11c | Strategies to improve adherence to intervention protocols,       | 9  |
| 9  | adherence            |      | and any procedures for monitoring adherence (eg, drug            |    |
| 10 |                      |      | tablet return; laboratory tests)                                 |    |
| 11 |                      |      |                                                                  |    |
| 12 |                      |      |                                                                  |    |
| 13 | Interventions:       | #11d | Relevant concomitant care and interventions that are             | 9  |
| 14 | concomitant care     |      | permitted or prohibited during the trial                         |    |
| 15 |                      |      |                                                                  |    |
| 16 |                      |      |                                                                  |    |
| 17 | Outcomes             | #12  | Primary, secondary, and other outcomes, including the            | 9  |
| 18 |                      |      | specific measurement variable (eg, systolic blood pressure),     |    |
| 19 |                      |      | analysis metric (eg, change from baseline, final value, time     |    |
| 20 |                      |      | to event), method of aggregation (eg, median, proportion),       |    |
| 21 |                      |      | and time point for each outcome. Explanation of the clinical     |    |
| 22 |                      |      | relevance of chosen efficacy and harm outcomes is strongly       |    |
| 23 |                      |      | recommended                                                      |    |
| 24 |                      |      |                                                                  |    |
| 25 |                      |      |                                                                  |    |
| 26 |                      |      |                                                                  |    |
| 27 |                      |      |                                                                  |    |
| 28 | Participant timeline | #13  | Time schedule of enrolment, interventions (including any         | 17 |
| 29 |                      |      | run-ins and washouts), assessments, and visits for               |    |
| 30 |                      |      | participants. A schematic diagram is highly recommended          |    |
| 31 |                      |      | (see Figure)                                                     |    |
| 32 |                      |      |                                                                  |    |
| 33 |                      |      |                                                                  |    |
| 34 |                      |      |                                                                  |    |
| 35 | Sample size          | #14  | Estimated number of participants needed to achieve study         | 6  |
| 36 |                      |      | objectives and how it was determined, including clinical and     |    |
| 37 |                      |      | statistical assumptions supporting any sample size               |    |
| 38 |                      |      | calculations                                                     |    |
| 39 |                      |      |                                                                  |    |
| 40 |                      |      |                                                                  |    |
| 41 |                      |      |                                                                  |    |
| 42 | Recruitment          | #15  | Strategies for achieving adequate participant enrolment to       | 6  |
| 43 |                      |      | reach target sample size                                         |    |
| 44 |                      |      |                                                                  |    |
| 45 |                      |      |                                                                  |    |
| 46 | Allocation: sequence | #16a | Method of generating the allocation sequence (eg,                | 6  |
| 47 | generation           |      | computer-generated random numbers), and list of any              |    |
| 48 |                      |      | factors for stratification. To reduce predictability of a random |    |
| 49 |                      |      | sequence, details of any planned restriction (eg, blocking)      |    |
| 50 |                      |      | should be provided in a separate document that is                |    |
| 51 |                      |      | unavailable to those who enrol participants or assign            |    |
| 52 |                      |      | interventions                                                    |    |
| 53 |                      |      |                                                                  |    |
| 54 |                      |      |                                                                  |    |
| 55 |                      |      |                                                                  |    |
| 56 |                      |      |                                                                  |    |
| 57 | Allocation           | #16b | Mechanism of implementing the allocation sequence (eg,           | 6  |
| 58 | concealment          |      | central telephone; sequentially numbered, opaque, sealed         |    |
| 59 |                      |      |                                                                  |    |
| 60 |                      |      |                                                                  |    |

|    |                        |      |                                                                |     |
|----|------------------------|------|----------------------------------------------------------------|-----|
| 1  | mechanism              |      | envelopes), describing any steps to conceal the sequence       |     |
| 2  |                        |      | until interventions are assigned                               |     |
| 3  |                        |      |                                                                |     |
| 4  | Allocation:            | #16c | Who will generate the allocation sequence, who will enrol      | 6   |
| 5  | implementation         |      | participants, and who will assign participants to              |     |
| 6  |                        |      | interventions                                                  |     |
| 7  |                        |      |                                                                |     |
| 8  |                        |      |                                                                |     |
| 9  | Blinding (masking)     | #17a | Who will be blinded after assignment to interventions (eg,     | 6-7 |
| 10 |                        |      | trial participants, care providers, outcome assessors, data    |     |
| 11 |                        |      | analysts), and how                                             |     |
| 12 |                        |      |                                                                |     |
| 13 |                        |      |                                                                |     |
| 14 | Blinding (masking):    | #17b | If blinded, circumstances under which unblinding is            | 6-7 |
| 15 | emergency              |      | permissible, and procedure for revealing a participant's       |     |
| 16 | unblinding             |      | allocated intervention during the trial                        |     |
| 17 |                        |      |                                                                |     |
| 18 |                        |      |                                                                |     |
| 19 |                        |      |                                                                |     |
| 20 | Data collection plan   | #18a | Plans for assessment and collection of outcome, baseline,      | 11  |
| 21 |                        |      | and other trial data, including any related processes to       |     |
| 22 |                        |      | promote data quality (eg, duplicate measurements, training     |     |
| 23 |                        |      | of assessors) and a description of study instruments (eg,      |     |
| 24 |                        |      | questionnaires, laboratory tests) along with their reliability |     |
| 25 |                        |      | and validity, if known. Reference to where data collection     |     |
| 26 |                        |      | forms can be found, if not in the protocol                     |     |
| 27 |                        |      |                                                                |     |
| 28 |                        |      |                                                                |     |
| 29 |                        |      |                                                                |     |
| 30 |                        |      |                                                                |     |
| 31 | Data collection plan:  | #18b | Plans to promote participant retention and complete follow-    | 11  |
| 32 | retention              |      | up, including list of any outcome data to be collected for     |     |
| 33 |                        |      | participants who discontinue or deviate from intervention      |     |
| 34 |                        |      | protocols                                                      |     |
| 35 |                        |      |                                                                |     |
| 36 |                        |      |                                                                |     |
| 37 |                        |      |                                                                |     |
| 38 | Data management        | #19  | Plans for data entry, coding, security, and storage, including | 11  |
| 39 |                        |      | any related processes to promote data quality (eg, double      |     |
| 40 |                        |      | data entry; range checks for data values). Reference to        |     |
| 41 |                        |      | where details of data management procedures can be             |     |
| 42 |                        |      | found, if not in the protocol                                  |     |
| 43 |                        |      |                                                                |     |
| 44 |                        |      |                                                                |     |
| 45 |                        |      |                                                                |     |
| 46 | Statistics: outcomes   | #20a | Statistical methods for analysing primary and secondary        | 11  |
| 47 |                        |      | outcomes. Reference to where other details of the statistical  |     |
| 48 |                        |      | analysis plan can be found, if not in the protocol             |     |
| 49 |                        |      |                                                                |     |
| 50 |                        |      |                                                                |     |
| 51 | Statistics: additional | #20b | Methods for any additional analyses (eg, subgroup and          | 11  |
| 52 | analyses               |      | adjusted analyses)                                             |     |
| 53 |                        |      |                                                                |     |
| 54 |                        |      |                                                                |     |
| 55 | Statistics: analysis   | #20c | Definition of analysis population relating to protocol non-    | 11  |
| 56 | population and         |      | adherence (eg, as randomised analysis), and any statistical    |     |
| 57 | missing data           |      | methods to handle missing data (eg, multiple imputation)       |     |
| 58 |                        |      |                                                                |     |
| 59 |                        |      |                                                                |     |
| 60 |                        |      |                                                                |     |

|    |                    |      |                                                                  |     |
|----|--------------------|------|------------------------------------------------------------------|-----|
| 1  | Data monitoring:   | #21a | Composition of data monitoring committee (DMC); summary          | n/a |
| 2  | formal committee   |      | of its role and reporting structure; statement of whether it is  |     |
| 3  |                    |      | independent from the sponsor and competing interests; and        |     |
| 4  |                    |      | reference to where further details about its charter can be      |     |
| 5  |                    |      | found, if not in the protocol. Alternatively, an explanation of  |     |
| 6  |                    |      | why a DMC is not needed                                          |     |
| 7  |                    |      |                                                                  |     |
| 8  |                    |      |                                                                  |     |
| 9  |                    |      |                                                                  |     |
| 10 |                    |      |                                                                  |     |
| 11 | Data monitoring:   | #21b | Description of any interim analyses and stopping guidelines,     | n/a |
| 12 | interim analysis   |      | including who will have access to these interim results and      |     |
| 13 |                    |      | make the final decision to terminate the trial                   |     |
| 14 |                    |      |                                                                  |     |
| 15 |                    |      |                                                                  |     |
| 16 | Harms              | #22  | Plans for collecting, assessing, reporting, and managing         | 11  |
| 17 |                    |      | solicited and spontaneously reported adverse events and          |     |
| 18 |                    |      | other unintended effects of trial interventions or trial conduct |     |
| 19 |                    |      |                                                                  |     |
| 20 |                    |      |                                                                  |     |
| 21 | Auditing           | #23  | Frequency and procedures for auditing trial conduct, if any,     | 11  |
| 22 |                    |      | and whether the process will be independent from                 |     |
| 23 |                    |      | investigators and the sponsor                                    |     |
| 24 |                    |      |                                                                  |     |
| 25 |                    |      |                                                                  |     |
| 26 |                    |      |                                                                  |     |
| 27 | Research ethics    | #24  | Plans for seeking research ethics committee / institutional      | 12  |
| 28 | approval           |      | review board (REC / IRB) approval                                |     |
| 29 |                    |      |                                                                  |     |
| 30 |                    |      |                                                                  |     |
| 31 | Protocol           | #25  | Plans for communicating important protocol modifications         | 12  |
| 32 | amendments         |      | (eg, changes to eligibility criteria, outcomes, analyses) to     |     |
| 33 |                    |      | relevant parties (eg, investigators, REC / IRBs, trial           |     |
| 34 |                    |      | participants, trial registries, journals, regulators)            |     |
| 35 |                    |      |                                                                  |     |
| 36 |                    |      |                                                                  |     |
| 37 | Consent or assent  | #26a | Who will obtain informed consent or assent from potential        | 12  |
| 38 |                    |      | trial participants or authorised surrogates, and how (see        |     |
| 39 |                    |      | Item 32)                                                         |     |
| 40 |                    |      |                                                                  |     |
| 41 |                    |      |                                                                  |     |
| 42 |                    |      |                                                                  |     |
| 43 | Consent or assent: | #26b | Additional consent provisions for collection and use of          | 12  |
| 44 | ancillary studies  |      | participant data and biological specimens in ancillary           |     |
| 45 |                    |      | studies, if applicable                                           |     |
| 46 |                    |      |                                                                  |     |
| 47 |                    |      |                                                                  |     |
| 48 | Confidentiality    | #27  | How personal information about potential and enrolled            | 12  |
| 49 |                    |      | participants will be collected, shared, and maintained in        |     |
| 50 |                    |      | order to protect confidentiality before, during, and after the   |     |
| 51 |                    |      | trial                                                            |     |
| 52 |                    |      |                                                                  |     |
| 53 |                    |      |                                                                  |     |
| 54 |                    |      |                                                                  |     |
| 55 | Declaration of     | #28  | Financial and other competing interests for principal            | 2   |
| 56 | interests          |      | investigators for the overall trial and each study site          |     |
| 57 |                    |      |                                                                  |     |
| 58 |                    |      |                                                                  |     |
| 59 | Data access        | #29  | Statement of who will have access to the final trial dataset,    | 12  |
| 60 |                    |      |                                                                  |     |

|    |                       |      |                                                                 |     |
|----|-----------------------|------|-----------------------------------------------------------------|-----|
| 1  |                       |      | and disclosure of contractual agreements that limit such        |     |
| 2  |                       |      | access for investigators                                        |     |
| 3  |                       |      |                                                                 |     |
| 4  | Ancillary and post    | #30  | Provisions, if any, for ancillary and post-trial care, and for  | 12  |
| 5  | trial care            |      | compensation to those who suffer harm from trial                |     |
| 6  |                       |      | participation                                                   |     |
| 7  |                       |      |                                                                 |     |
| 8  |                       |      |                                                                 |     |
| 9  | Dissemination policy: | #31a | Plans for investigators and sponsor to communicate trial        | 12  |
| 10 | trial results         |      | results to participants, healthcare professionals, the public,  |     |
| 11 |                       |      | and other relevant groups (eg, via publication, reporting in    |     |
| 12 |                       |      | results databases, or other data sharing arrangements),         |     |
| 13 |                       |      | including any publication restrictions                          |     |
| 14 |                       |      |                                                                 |     |
| 15 |                       |      |                                                                 |     |
| 16 |                       |      |                                                                 |     |
| 17 | Dissemination policy: | #31b | Authorship eligibility guidelines and any intended use of       | 12  |
| 18 | authorship            |      | professional writers                                            |     |
| 19 |                       |      |                                                                 |     |
| 20 |                       |      |                                                                 |     |
| 21 | Dissemination policy: | #31c | Plans, if any, for granting public access to the full protocol, | 12  |
| 22 | reproducible          |      | participant-level dataset, and statistical code                 |     |
| 23 | research              |      |                                                                 |     |
| 24 |                       |      |                                                                 |     |
| 25 |                       |      |                                                                 |     |
| 26 |                       |      |                                                                 |     |
| 27 | Informed consent      | #32  | Model consent form and other related documentation given        | n/a |
| 28 | materials             |      | to participants and authorised surrogates                       |     |
| 29 |                       |      |                                                                 |     |
| 30 |                       |      |                                                                 |     |
| 31 | Biological specimens  | #33  | Plans for collection, laboratory evaluation, and storage of     | n/a |
| 32 |                       |      | biological specimens for genetic or molecular analysis in the   |     |
| 33 |                       |      | current trial and for future use in ancillary studies, if       |     |
| 34 |                       |      | applicable                                                      |     |
| 35 |                       |      |                                                                 |     |
| 36 |                       |      |                                                                 |     |

37 The SPIRIT checklist is distributed under the terms of the Creative Commons Attribution License CC-  
 38 BY-ND 3.0. This checklist was completed on 06. July 2018 using <http://www.goodreports.org/>, a tool  
 39 made by the [EQUATOR Network](#) in collaboration with [Penelope.ai](#)  
 40  
 41  
 42  
 43  
 44  
 45  
 46  
 47  
 48  
 49  
 50  
 51  
 52  
 53  
 54  
 55  
 56  
 57  
 58  
 59  
 60
