# Supplementary material for: Application of electroacupuncture for postoperative pain management after total knee arthroplasty: a study protocol for a single-blinded, randomised placebo-controlled trial
Source: PubMed Central journal article supplement — BMJ Open. 2019 Apr 8;9(4):e026084. doi: 10.1136/bmjopen-2018-026084 (PMC6500353; doi:10.1136/bmjopen-2018-026084), 2019-04-08
Supplement: bmjopen-2018-026084supp001.pdf [file bmjopen-2018-026084supp001.pdf]

## Supplemental file

### 1. Hospital for Special Surgery Knee-Rating Scale<sup>1</sup>

#### **Hospital for Special Surgery Knee-Rating Scale (HSS)**

| <b>Criteria</b>                                                             | <b>Points</b> |
|-----------------------------------------------------------------------------|---------------|
| Pain (30 points)                                                            |               |
| No pain at any time                                                         | 30            |
| No pain on walking                                                          | 15            |
| Mild pain on walking                                                        | 10            |
| Moderate pain on waling                                                     | 5             |
| Severe pain on walking                                                      | 0             |
| No pain at rest                                                             | 15            |
| Mild pain at rest                                                           | 10            |
| Moderate pain at rest                                                       | 5             |
| Severe pain at rest                                                         | 0             |
| Function (22 points)                                                        |               |
| Walking and standing unlimited                                              | 12            |
| Walking distance of 5-10 blocks and standing ability<br>intermittent >1/2hr | 10            |
| Walking 1-5 blocks and standing up < 1/2hr                                  | 8             |
| Walking less than 1 block                                                   | 4             |
| Cannot walk                                                                 | 0             |
| Climbing stairs                                                             | 5             |
| Climbing stairs with support                                                | 2             |
| Transfer activity                                                           | 5             |
| Transfer activity with support                                              | 2             |
| Range of Motion (18 points)                                                 |               |
| 1 point for each 8 degrees (max 18 points)                                  | 18            |
| Muscle Strength (10 points)                                                 |               |
| Excellent: cannot break quadriceps power                                    | 10            |
| Good: can break the quadriceps power                                        | 8             |
| Fair: move through the arc of motion                                        | 4             |
| Poor: cannot move through arc of motion                                     | 0             |
| Flexion Deformity (10 points)                                               |               |
| No deformity                                                                | 10            |
| Less than 5 degrees                                                         | 8             |
| 5-10 degrees                                                                | 5             |
| > 10 degrees                                                                | 0             |
| Instability (10 points)                                                     |               |
| None                                                                        | 10            |

|                             |    |
|-----------------------------|----|
| Mild: 0-5 degrees           | 8  |
| Moderate: 5-15 degrees      | 5  |
| Severe: > 15degrees         | 0  |
| <b>Subtraction</b>          |    |
| One cane                    | -1 |
| One crutch                  | -2 |
| Two crutches                | -3 |
| Extension lag of 5 degrees  | -2 |
| Extension lag of 10 degrees | -3 |
| Extension lag of 15 degrees | -5 |
| Each 5 degrees of varus     | -1 |
| Each 5 degrees of valgus    | -1 |

Excellent  $\geq 85$

Good = 70-84

Fair = 60-69

Poor  $\leq 60$

## 2. Hamilton Anxiety Rating Scale (HAMA)<sup>2</sup>

### **Hamilton Anxiety Rating Scale (HAMA)**

Below is a list of phrases that describe certain feeling that people have. Rate the patients by finding the answer which best describes the extent to which he/she has these conditions. Select one of the five responses for each of the fourteen questions.

0 = Not present, 1 = Mild, 2 = Moderate, 3 = Severe, 4 = Very severe.

#### **1 Anxious mood**

Worries, anticipation of the worst, fearful anticipation, irritability.

0  1  2  3  4

#### **2 Tension**

Feelings of tension, fatigability, startle response, moved to tears easily, trembling, feelings of restlessness, inability to relax.

0  1  2  3  4

#### **3 Fears**

Of dark, of strangers, of being left alone, of animals, of traffic, of crowds.

0  1  2  3  4

#### **4 Insomnia**

Difficulty in falling asleep, broken sleep, unsatisfying sleep and fatigue on waking, dreams, nightmares, night terrors

0  1  2  3  4

#### **5 Intellectual**

Difficulty in concentration, poor memory.

0  1  2  3  4

**6 Depressed mood**

Loss of interest, lack of pleasure in hobbies, depression, early waking, diurnal swing.

0  1  2  3  4

**7 Somatic (muscular)**

Pains and aches, twitching, stiffness, myoclonic jerks, grinding of teeth, unsteady voice, increased muscular tone.

0  1  2  3  4

**8 Somatic (sensory)**

Tinnitus, blurring of vision, hot and cold flushes, feelings of weakness, pricking sensation.

0  1  2  3  4

**9 Cardiovascular symptoms**

Tachycardia, palpitations, pain in chest, throbbing of vessels, fainting feelings, missing beat

0  1  2  3  4

**10 Respiratory symptoms**

Pressure or constriction in chest, choking feelings, sighing, dyspnea.

0  1  2  3  4

**11 Gastrointestinal symptoms**

Difficulty in swallowing, wind abdominal pain, burning sensations, abdominal fullness, nausea, vomiting, borborygmi, looseness of bowels, loss of weight, constipation.

0  1  2  3  4

**12 Genitourinary symptoms**

Frequency of micturition, urgency of micturition, amenorrhea, menorrhagia, development of frigidity, premature ejaculation, loss of libido, impotence

0  1  2  3  4

**13 Autonomic symptoms**

Dry mouth, flushing, pallor, tendency to sweat, giddiness, tension headache, raising of hair.

0  1  2  3  4

**14 Behavior at interview**

Fidgeting, restlessness or pacing, tremor of hands, furrowed brow, strained face, sighing or rapid respiration, facial pallor, swallowing, etc.

0  1  2  3  4

0 ~ 7: No anxiety

8~14: Possible anxiety

15~21: Mild anxiety

22~29: Obvious anxiety

>29: Severe anxiety

3. Functional Living Index Emesis (FLIE)<sup>3</sup>

**Functional Living Index Emesis (FLIE)**

1. How much nausea have you had in the past 3 days?

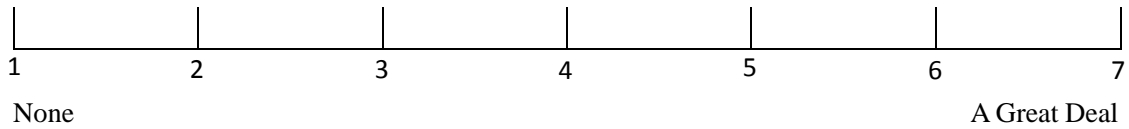

2. Has nausea affected your ability to maintain usual recreation or leisure activities in the past 3 days?

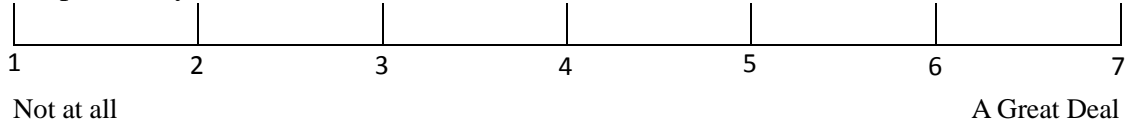

3. Has nausea affected your ability to make a meal or do minor household repairs during the past 3 days?

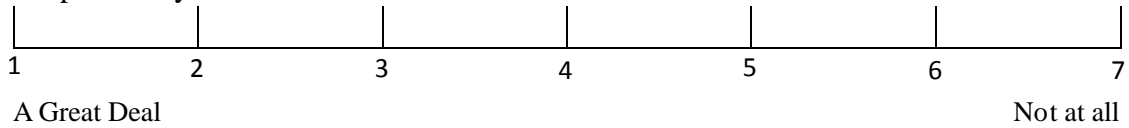

4. How much has nausea affected your ability to enjoy a meal in the past 3 days?

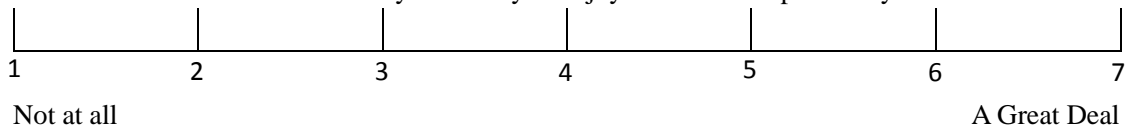

5. How much has nausea affected your ability to enjoy liquid refreshment in the past 3 days?

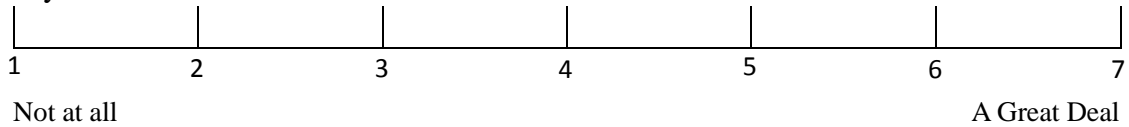

6. How much has nausea affected your willingness to see and spend time with family and friends, in the past 3 days?

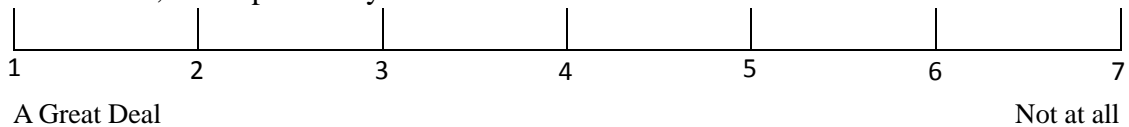

7. Has nausea affected your daily functioning in the past 3 days?

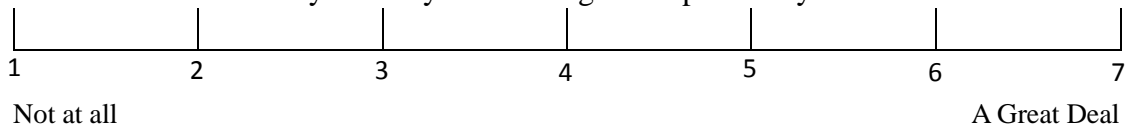

8. Rate the degree to which your nausea has imposed a hardship on you (personally) in the past 3 days.

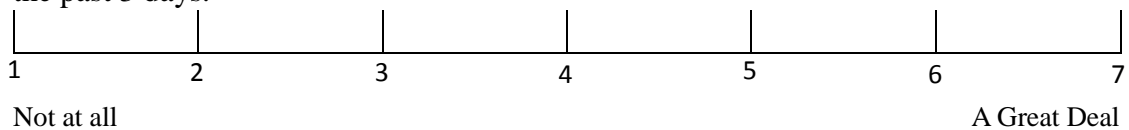

9. Rate the degree to which your nausea has imposed a hardship on those closest to you in the past 3 days.

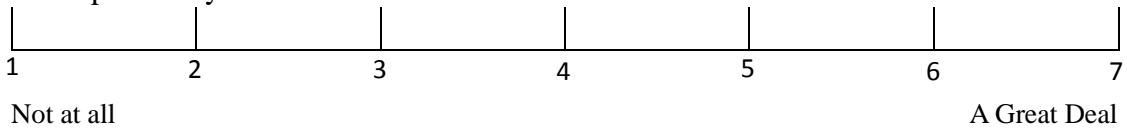

10. How much vomiting have you had in the past 3 days?

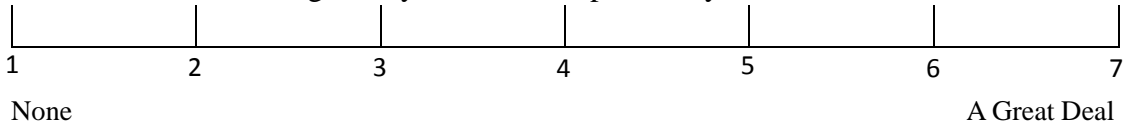

11. Has vomiting affected your ability to maintain usual recreation or leisure activities during the past 3 days?

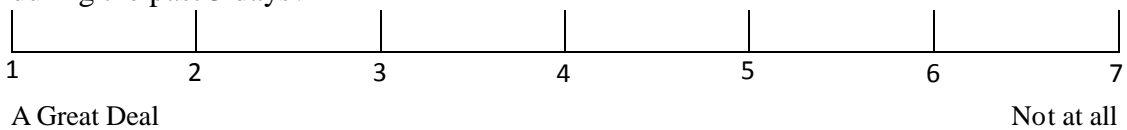

12. Has vomiting affected your ability to complete your usual household tasks during the past 3 days?

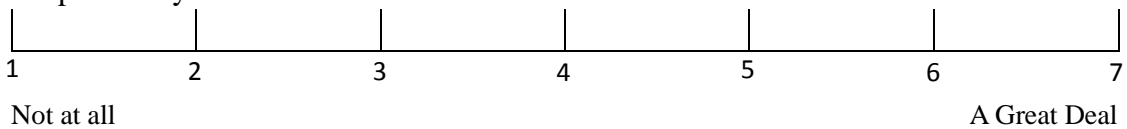

13. How much has vomiting affected your ability to enjoy a meal in the past 3 days?

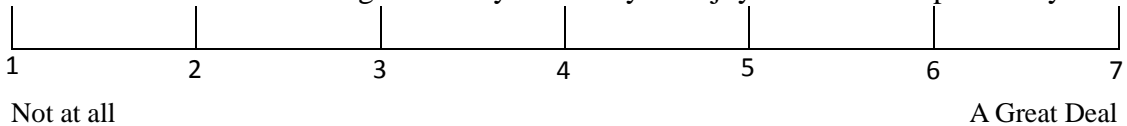

14. How much has vomiting affected your ability to enjoy liquid refreshment in the past 3 days?

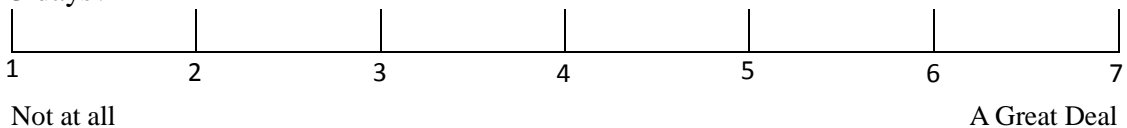

15. How much has vomiting affected your willingness to see and spend time with friends, in the past 3 days?

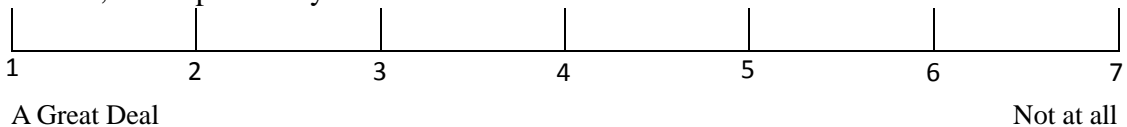

16. Has vomiting affected your daily functioning during the past 3 days?

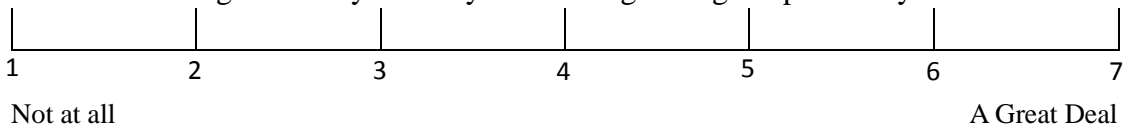

17. Rate the degree to which your vomiting has imposed a hardship on you (personally) in the past 3 days.

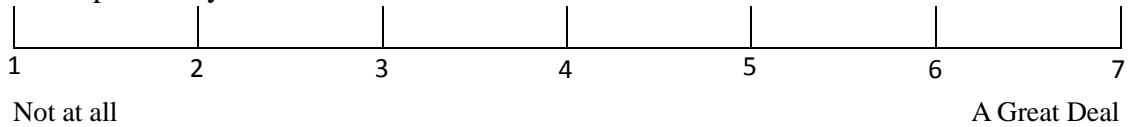

18. Rate the degree to which your vomiting has imposed a hardship on those closest to you in the past 3 days.

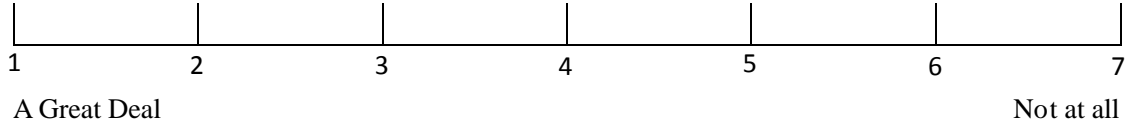

### References:

- 1 Bach CM, Nogler M, Steingruber IE, *et al.* Scoring Systems in Total Knee Arthroplasty. 2002;:184–96.
- 2 HAMILTON M. The assessment of anxiety states by rating. *Br J Med Psychol* 1959;**32**:50–5.<http://www.ncbi.nlm.nih.gov/pubmed/13638508>
- 3 Lindley CM, Hirsch JD, O’Neill C V., *et al.* Quality of life consequences of emesis. *Qual Life Res* 1992;**1**:331–40.
